# Supplementary material for: Insights from the proteome profile of Phytophthora capsici in response to the novel fungicide SYP-14288
Source: PeerJ. 2019 Aug 27;7:e7626. doi: 10.7717/peerj.7626 (PMC6716503; doi:10.7717/peerj.7626)
Supplement: Supplemental Information 2 [file peerj-07-7626-s002.xlsx]

## Sheet: Sheet1
Accession	Description	Score	Coverage	# Proteins	# Unique Peptides	# Peptides	# PSMs	# AAs	MW [kDa]	calc. pI	3/1
262108121	pyruvate, phosphate dikinase, putative [Phytophthora infestans T30-4]	3613.01	0.3578	4	2	26	241	900	98.3	5.8	0.174
348676929	hypothetical protein PHYSODRAFT_559636 [Phytophthora sojae]	356.63	0.1877	1	3	7	33	538	58.9	5.47	0.226
262107586	proteasome subunit alpha type-3, putative [Phytophthora infestans T30-4]	93.29	0.2442	2	2	5	8	258	29.1	5.52	0.242
262110231	DNA ligase, putative [Phytophthora infestans T30-4]	46.34	0.0031	2	1	1	1	3896	448.1	9.63	0.252
348687452	hypothetical protein PHYSODRAFT_284079 [Phytophthora sojae]	289.36	0.6818	2	6	6	33	66	7.6	9.45	0.299
348688731	hypothetical protein PHYSODRAFT_284295 [Phytophthora sojae]	4693.48	0.5463	3	5	21	399	454	48.9	5.27	0.303
262101904	triosephosphate isomerase [Phytophthora infestans T30-4]	139.88	0.244	1	1	5	31	250	27.1	5.36	0.312
348677147	hypothetical protein PHYSODRAFT_346054 [Phytophthora sojae]	512.7	0.1794	1	2	4	41	340	37.1	7.11	0.324
262111199	conserved hypothetical protein [Phytophthora infestans T30-4]	169.64	0.2151	2	1	4	9	251	27.1	6.16	0.33
262109977	conserved hypothetical protein [Phytophthora infestans T30-4]	65.91	0.0228	1	1	1	2	569	61	9.29	0.33
348677561	hypothetical protein PHYSODRAFT_354575 [Phytophthora sojae]	146.65	0.1401	1	2	2	5	157	18	6.64	0.333
348677474	hypothetical protein PHYSODRAFT_559962 [Phytophthora sojae]	135.19	0.2212	1	2	6	10	330	36	5.73	0.334
348683063	hypothetical protein PHYSODRAFT_554510 [Phytophthora sojae]	92.9	0.0284	2	1	1	6	317	35.5	5.19	0.343
262108245	peptidyl-prolyl cis-trans isomerase, putative [Phytophthora infestans T30-4]	310.91	0.1757	2	2	8	33	478	52.4	5.88	0.36
348668189	hypothetical protein PHYSODRAFT_339892 [Phytophthora sojae]	51.92	0.0171	1	1	1	1	644	67.8	5.17	0.363
262101526	aspartyl-tRNA synthetase, putative [Phytophthora infestans T30-4]	221.17	0.2257	9	1	10	29	514	58	6.07	0.367
348687321	hypothetical protein PHYSODRAFT_471713 [Phytophthora sojae]	1821.34	0.4146	2	9	27	176	767	84.9	6.05	0.373
262104765	phosphate acetyltransferase [Phytophthora infestans T30-4]	301.67	0.2231	1	2	11	35	771	84.2	6.96	0.375
262107965	importin-like protein [Phytophthora infestans T30-4]	661.29	0.152	1	3	10	32	1079	117.3	4.65	0.379
348673584	hypothetical protein PHYSODRAFT_316694 [Phytophthora sojae]	33.57	0.0559	1	1	4	6	787	88.2	5.97	0.38
348688971	hypothetical protein PHYSODRAFT_537442 [Phytophthora sojae]	309.55	0.1837	2	2	8	31	479	52.4	6.11	0.381
262102613	sphingolipid delta(4)-desaturase DES1-like protein [Phytophthora infestans T30-4]	85.47	0.0543	1	1	1	2	350	40.2	8.27	0.383
348684064	hypothetical protein PHYSODRAFT_485399 [Phytophthora sojae]	2290.6	0.5724	3	7	22	225	421	46.8	5.83	0.385
262111992	fumarate hydratase, mitochondrial precursor [Phytophthora infestans T30-4]	238.87	0.3319	1	1	12	41	473	50.7	6.48	0.385
262111123	argininosuccinate synthase [Phytophthora infestans T30-4]	1194.72	0.4336	3	2	16	133	459	51.1	6.13	0.391
262109014	conserved hypothetical protein [Phytophthora infestans T30-4]	0	0.0081	1	1	1	1	621	71.2	8.1	0.391
348687330	hypothetical protein PHYSODRAFT_284057 [Phytophthora sojae]	152	0.3073	1	3	5	19	205	23.2	4.96	0.393
347978988	40S ribosomal protein S2 [Plasmopara viticola]	844.79	0.4698	1	3	7	82	149	16	9.86	0.398
262101565	50S ribosomal protein L1 [Phytophthora infestans T30-4]	97.88	0.1917	1	1	3	7	266	28.3	9.6	0.399
348666456	hypothetical protein PHYSODRAFT_341553 [Phytophthora sojae]	117.6	0.0333	1	1	1	6	390	43	7.33	0.399
262105191	malate dehydrogenase [Phytophthora infestans T30-4]	278.27	0.2054	1	1	6	20	336	36.4	6.58	0.405
262111671	conserved hypothetical protein [Phytophthora infestans T30-4]	72.57	0.0891	2	1	1	4	101	11.3	9.82	0.405
348684155	hypothetical protein PHYSODRAFT_478148 [Phytophthora sojae]	1296.86	0.1689	6	3	51	129	4090	443.4	6.01	0.408
348673952	hypothetical protein PHYSODRAFT_286691 [Phytophthora sojae]	804.72	0.3642	2	4	4	58	151	16.9	5.86	0.41
325193405	calmodulin putative [Albugo laibachii Nc14]	64.16	0.2752	6	4	4	10	149	17	4.2	0.412
262099290	phosphoenolpyruvate carboxykinase [Phytophthora infestans T30-4]	87.59	0.1857	1	2	7	14	533	59.2	5.97	0.415
348687768	hypothetical protein PHYSODRAFT_293395 [Phytophthora sojae]	1585.69	0.367	2	7	21	137	763	81.7	6.16	0.416
262106601	conserved hypothetical protein [Phytophthora infestans T30-4]	0	0.0047	1	1	1	7	1266	140.7	6.57	0.418
262103226	succinate semialdehyde dehydrogenase, mitochondrial precursor [Phytophthora infestans T30-4]	388.18	0.2327	1	2	6	23	507	54.1	7.53	0.423
262100296	hypothetical protein PITG_01004 [Phytophthora infestans T30-4]	83.66	0.4815	1	1	1	7	54	6.1	5.24	0.426
262099431	aldehyde dehydrogenase, putative [Phytophthora infestans T30-4]	102.95	0.2148	1	2	10	18	526	58.1	8.88	0.432
262106566	conserved hypothetical protein [Phytophthora infestans T30-4]	36.6	0.0229	1	1	1	2	437	48.1	9.5	0.432
312184101	translation elongation factor 1 alpha [Phytophthora drechsleri]	5385.83	0.6122	55	3	13	407	294	31.9	7.52	0.434
262109829	endoribonuclease L-PSP, putative [Phytophthora infestans T30-4]	226.58	0.125	1	1	3	13	160	16.6	5.52	0.436
348666853	hypothetical protein PHYSODRAFT_288964 [Phytophthora sojae]	35.82	0.1765	1	1	3	6	153	17.2	4.55	0.438
348682731	hypothetical protein PHYSODRAFT_285741 [Phytophthora sojae]	313.28	0.236	1	1	5	33	250	27	5.72	0.441
358246099	enolase, partial [Phytophthora syringae]	5343.67	0.5346	5	1	16	364	376	40.2	5.06	0.442
348679171	hypothetical protein PHYSODRAFT_559518 [Phytophthora sojae]	139.13	0.1096	1	2	4	10	429	46	6.8	0.442
262097641	conserved hypothetical protein [Phytophthora infestans T30-4]	0	0.1188	2	1	1	1	101	11.3	4.98	0.442
262109700	adenylosuccinate lyase [Phytophthora infestans T30-4]	317.69	0.2979	1	1	10	24	480	54.1	6.35	0.444
262109932	aconitate hydratase, mitochondrial precursor [Phytophthora infestans T30-4]	1334.83	0.2075	2	1	15	107	824	88.6	7.68	0.447
262100677	glycine cleavage system H protein, mitochondrial precursor [Phytophthora infestans T30-4]	89.86	0.1188	1	1	1	5	160	17.2	4.6	0.447
262111842	heat shock protein 90 [Phytophthora infestans T30-4]	2823.3	0.4193	5	3	31	252	706	80.3	4.94	0.449
348679875	hypothetical protein PHYSODRAFT_496544 [Phytophthora sojae]	237.77	0.1162	4	1	5	27	396	42.8	6.3	0.452
348689583	hypothetical protein PHYSODRAFT_476521 [Phytophthora sojae]	107.1	0.1707	1	1	1	3	123	13.9	5.39	0.452
348672818	hypothetical protein PHYSODRAFT_347462 [Phytophthora sojae]	275.37	0.15	1	1	3	15	160	16.5	5.87	0.453
262101093	homoserine dehydrogenase, putative [Phytophthora infestans T30-4]	205.51	0.2128	2	3	6	17	437	46.7	5.86	0.456
262102890	conserved hypothetical protein [Phytophthora infestans T30-4]	76.57	0.1118	1	1	3	4	501	55.7	6.05	0.46
262097378	phosphoglycerate kinase [Phytophthora infestans T30-4]	624.64	0.4091	1	4	8	59	242	25.2	4.96	0.461
262102190	sporangia induced dynein heavy chain [Phytophthora infestans T30-4]	19.44	0.0024	2	1	1	2	4547	516.2	5.68	0.462
348669512	phosphoglycerate kinase [Phytophthora sojae]	2106.52	0.4203	2	10	14	129	414	43.6	6.67	0.463
348670787	hypothetical protein PHYSODRAFT_317771 [Phytophthora sojae]	283.43	0.1554	2	1	11	33	959	107.1	5.92	0.465
332985070	enolase, partial [Phytophthora capsici]	2384.54	0.8867	7	2	7	159	150	16	5.95	0.465
348675944	hypothetical protein PHYSODRAFT_286379 [Phytophthora sojae]	30.67	0.1644	1	3	3	11	146	16.5	4.93	0.466
262098595	adenosylhomocysteinase [Phytophthora infestans T30-4]	1185.99	0.3917	2	3	14	83	480	52.5	5.67	0.467
262111867	pyruvate carboxylase, mitochondrial precursor [Phytophthora infestans T30-4]	1458.28	0.4018	1	4	20	119	657	72	9.04	0.467
348668001	hypothetical protein PHYSODRAFT_526723 [Phytophthora sojae]	669.15	0.1641	1	2	4	42	329	36.5	6.34	0.468
348664576	hypothetical protein PHYSODRAFT_343277 [Phytophthora sojae]	5969.76	0.5078	7	11	35	371	900	98.3	6.38	0.468
348676995	hypothetical protein PHYSODRAFT_559670 [Phytophthora sojae]	0	0.1197	1	2	2	3	234	26.2	8.94	0.47
348664988	hypothetical protein PHYSODRAFT_356224 [Phytophthora sojae]	67.13	0.1209	2	1	2	3	182	20.8	9.19	0.474
262097629	ATP phosphoribosyltransferase [Phytophthora infestans T30-4]	29.8	0.1505	2	3	3	5	299	32.1	6.79	0.475
299830444	ribosomal protein S2 [Pythium ultimum]	32.59	0.0303	2	1	1	3	198	23.4	9.95	0.478
262097711	CUG-BP- and ETR-3-like factor, putative [Phytophthora infestans T30-4]	0	0.0706	3	1	1	2	255	27.4	5.54	0.478
262097751	conserved hypothetical protein [Phytophthora infestans T30-4]	46.15	0.121	1	2	2	4	157	16.9	7.52	0.481
348669575	hypothetical protein PHYSODRAFT_522490 [Phytophthora sojae]	0	0.1303	1	4	5	5	476	54.4	6.92	0.481
262109798	acetate kinase [Phytophthora infestans T30-4]	106.42	0.0981	1	2	4	8	428	45.8	6.76	0.482
348675658	hypothetical protein PHYSODRAFT_286325 [Phytophthora sojae]	1989.63	0.3373	4	2	8	105	335	35.3	6.68	0.483
348677650	hypothetical protein PHYSODRAFT_264166 [Phytophthora sojae]	350.85	0.1314	2	5	5	17	525	57.5	8.24	0.483
348670068	hypothetical protein PHYSODRAFT_355817 [Phytophthora sojae]	3122.04	0.4901	14	1	33	269	706	80.4	4.94	0.489
348665183	hypothetical protein PHYSODRAFT_551513 [Phytophthora sojae]	590.8	0.2319	2	3	7	48	345	37.2	9.17	0.492
262110953	60S ribosomal protein L44 [Phytophthora infestans T30-4]	46.61	0.1827	2	2	2	8	104	12.2	10.32	0.492
262098592	acyl-CoA desaturase [Phytophthora infestans T30-4]	153.09	0.0883	2	1	2	7	317	36.9	8.57	0.493
262107481	pre-mRNA-splicing factor SF2 [Phytophthora infestans T30-4]	27.26	0.0269	3	1	1	2	297	33.9	8.56	0.496
348675628	hypothetical protein PHYSODRAFT_251122 [Phytophthora sojae]	102.8	0.1869	3	3	3	8	198	22.1	5.11	0.497
348670618	hypothetical protein PHYSODRAFT_337250 [Phytophthora sojae]	151.56	0.0763	6	1	2	6	459	50.2	5.41	0.497
348674028	hypothetical protein PHYSODRAFT_562349 [Phytophthora sojae]	35.33	0.0494	1	1	1	1	263	29.6	9.29	0.499
262108004	6-phosphofructokinase, putative [Phytophthora infestans T30-4]	323.27	0.2282	1	3	11	35	504	54.8	7.66	0.5
348678486	hypothetical protein PHYSODRAFT_261332 [Phytophthora sojae]	368.41	0.2238	1	3	11	32	764	83.3	6.51	0.5
348664737	hypothetical protein PHYSODRAFT_358108 [Phytophthora sojae]	454	0.3187	2	2	10	48	455	48.3	6.06	0.502
262102812	malate dehydrogenase, mitochondrial precursor [Phytophthora infestans T30-4]	2970.94	0.4478	4	4	10	154	335	35.4	6.86	0.503
348671330	hypothetical protein PHYSODRAFT_518702 [Phytophthora sojae]	307.88	0.2236	1	1	6	18	331	37	5.15	0.504
262109357	3-isopropylmalate dehydrogenase [Phytophthora infestans T30-4]	387.58	0.1191	1	1	4	13	361	39	5.35	0.511
262110397	glutaredoxin [Phytophthora infestans T30-4]	42.63	0.1923	2	2	2	4	104	11	5.38	0.513
262100126	T-complex protein 1 subunit delta [Phytophthora infestans T30-4]	164.59	0.2101	2	1	8	21	533	57.2	6.48	0.515
348674594	hypothetical protein PHYSODRAFT_360745 [Phytophthora sojae]	853.58	0.4115	3	3	8	76	260	29.2	6.81	0.516
348671102	hypothetical protein PHYSODRAFT_355308 [Phytophthora sojae]	37.9	0.0625	1	1	1	1	128	14.2	4.49	0.517
348668109	putative dehydrogenase [Phytophthora sojae]	387.58	0.1191	1	1	4	14	361	38.9	6.19	0.518
262111598	12-oxophytodienoate reductase, putative [Phytophthora infestans T30-4]	501.41	0.1111	7	1	4	27	396	43.3	6.09	0.52
262107903	conserved hypothetical protein [Phytophthora infestans T30-4]	251.44	0.4615	1	2	3	20	117	11.9	4.07	0.52
262108863	argininosuccinate lyase [Phytophthora infestans T30-4]	585.41	0.2842	2	10	10	34	461	50.8	5.9	0.521
348683217	hypothetical protein PHYSODRAFT_358973 [Phytophthora sojae]	336.1	0.3065	1	2	7	26	336	36.3	7.33	0.523
262109730	aldehyde dehydrogenase, mitochondrial precursor [Phytophthora infestans T30-4]	2565.41	0.5101	1	6	17	170	494	53.7	5.49	0.523
348684136	hypothetical protein PHYSODRAFT_541556 [Phytophthora sojae]	4981.75	0.6095	3	6	20	233	525	56.7	5.95	0.523
348690896	hypothetical protein PHYSODRAFT_553624 [Phytophthora sojae]	662.68	0.5055	1	2	19	46	546	59.1	5.27	0.524
348673004	hypothetical protein PHYSODRAFT_354913 [Phytophthora sojae]	584.93	0.3415	1	4	8	61	325	34.2	6.27	0.526
348670337	hypothetical protein PHYSODRAFT_564447 [Phytophthora sojae]	291.41	0.3298	1	1	12	43	473	50.6	6.48	0.527
348690729	hypothetical protein PHYSODRAFT_323907 [Phytophthora sojae]	54.07	0.2125	5	2	2	7	80	9.7	10.1	0.533
325191513	creatine kinase putative [Albugo laibachii Nc14]	33.82	0.0909	1	1	3	7	341	38.1	6.6	0.534
348675559	hypothetical protein PHYSODRAFT_561180 [Phytophthora sojae]	52.24	0.053	1	1	1	1	264	29.4	5.39	0.534
348665865	hypothetical protein PHYSODRAFT_341899 [Phytophthora sojae]	105.29	0.2518	1	4	7	20	139	15.5	11.27	0.536
348690068	hypothetical protein PHYSODRAFT_248814 [Phytophthora sojae]	283.97	0.1672	1	2	7	24	622	68.4	7.23	0.536
262108925	NADP-dependent malic enzyme [Phytophthora infestans T30-4]	291.45	0.1468	1	2	6	28	538	59	5.66	0.537
262103170	myosin-like protein [Phytophthora infestans T30-4]	286.85	0.1418	1	1	17	33	1474	164.2	6.86	0.539
262095198	S-formylglutathione hydrolase, putative [Phytophthora infestans T30-4]	157.71	0.1631	2	3	3	8	282	31.3	6.21	0.539
262099832	pyridoxal biosynthesis lyase pdxS [Phytophthora infestans T30-4]	276.12	0.3935	4	10	10	29	310	33.1	5.62	0.54
348685639	hypothetical protein PHYSODRAFT_480655 [Phytophthora sojae]	30.5	0.0814	1	3	3	3	307	32.9	6.52	0.54
348677638	hypothetical protein PHYSODRAFT_560104 [Phytophthora sojae]	61.56	0.0845	3	3	3	4	426	46.2	5.8	0.54
262102276	cysteine synthase [Phytophthora infestans T30-4]	1251.02	0.3519	1	2	10	83	341	36.4	6.8	0.54
348688827	hypothetical protein PHYSODRAFT_401211 [Phytophthora sojae]	117.69	0.3651	2	2	2	33	63	7.3	10.01	0.542
348689614	hypothetical protein PHYSODRAFT_353660 [Phytophthora sojae]	240.3	0.4906	1	9	9	42	159	18.3	10.4	0.543
262098605	phosphoenolpyruvate carboxykinase [Phytophthora infestans T30-4]	541.63	0.3708	5	15	15	76	569	63	6.96	0.544
262102680	formate dehydrogenase [Phytophthora infestans T30-4]	70.7	0.0984	1	5	5	11	386	42.5	8.07	0.547
262106295	ketol-acid reductoisomerase [Phytophthora infestans T30-4]	1396.81	0.3126	3	17	17	159	515	56.5	6.43	0.548
262106251	DEAD/DEAH box RNA helicase, putative [Phytophthora infestans T30-4]	255.25	0.2629	1	1	14	28	639	68.8	7.12	0.548
262096956	actin-depolymerizing factor, putative [Phytophthora infestans T30-4]	402.7	0.2238	2	3	3	40	143	15.9	5.19	0.548
262104244	mannose-1-phosphate guanyltransferase beta, putative [Phytophthora infestans T30-4]	141.95	0.4039	2	1	7	12	359	39.3	5.44	0.55
348690141	hypothetical protein PHYSODRAFT_284543 [Phytophthora sojae]	185.36	0.7925	4	7	7	37	106	12.8	6.52	0.55
262103864	4-coumarate-CoA ligase, putative [Phytophthora infestans T30-4]	129.18	0.118	1	1	3	17	466	51.3	6.58	0.55
348681440	hypothetical protein PHYSODRAFT_285579 [Phytophthora sojae]	5356.76	0.5412	2	4	13	445	340	36.3	6.54	0.551
348681277	hypothetical protein PHYSODRAFT_557322 [Phytophthora sojae]	182.35	0.2886	1	1	11	20	596	63.4	5.9	0.551
62899789	RecName: Full=Autophagy-related protein 8; AltName: Full=Autophagy-related ubiquitin-like modifier ATG8; Flags: Precursor	107.04	0.431	2	3	3	7	116	13.5	8.92	0.551
348688629	hypothetical protein PHYSODRAFT_343844 [Phytophthora sojae]	522.02	0.3281	1	7	15	47	506	54.9	7.64	0.552
262111802	myosin-like protein [Phytophthora infestans T30-4]	75.83	0.0365	1	1	1	3	274	30.7	5.52	0.554
348684970	hypothetical protein PHYSODRAFT_284984 [Phytophthora sojae]	379.78	0.4084	1	5	8	29	262	27.9	5.08	0.555
348677155	hypothetical protein PHYSODRAFT_559773 [Phytophthora sojae]	808.28	0.2823	2	3	8	84	333	36.2	6.68	0.556
262104624	glutamyl-tRNA synthetase, putative [Phytophthora infestans T30-4]	241.1	0.1351	2	4	11	23	903	100.7	9.14	0.557
262103469	dihydroxy-acid dehydratase, putative [Phytophthora infestans T30-4]	182.35	0.2819	2	1	11	21	596	63.3	5.91	0.557
348682469	hypothetical protein PHYSODRAFT_299659 [Phytophthora sojae]	191.71	0.1565	1	2	3	14	409	44	6.84	0.558
262098735	alcohol dehydrogenase, putative [Phytophthora infestans T30-4]	125.67	0.2269	1	2	11	25	454	49.4	7.59	0.559
348677732	hypothetical protein PHYSODRAFT_351217 [Phytophthora sojae]	62.18	0.0868	2	4	4	8	507	56.1	7.43	0.559
262100355	5-methlytetrahydropteroyltriglutamate-homocysteine methyltransferease [Phytophthora infestans T30-4]	1702.61	0.3429	3	5	23	155	767	84.9	6.11	0.56
262105205	peroxiredoxin-2 [Phytophthora infestans T30-4]	441.94	0.6515	1	2	11	54	198	21.9	5.2	0.562
348675840	hypothetical protein PHYSODRAFT_260724 [Phytophthora sojae]	572.05	0.3226	2	2	7	40	403	43.1	5.99	0.562
25008506	RecName: Full=GMP reductase; AltName: Full=Guanosine 5'-monophosphate oxidoreductase; Short=Guanosine monophosphate reductase	72.34	0.0635	3	2	2	4	362	38.9	8.27	0.562
390627286	heat shock protein 90, partial [Phytophthora taxon forestsoil]	614.76	0.3737	10	1	12	79	297	34	5.25	0.563
348690023	hypothetical protein PHYSODRAFT_284519 [Phytophthora sojae]	552.78	0.2765	3	6	6	88	358	39.3	5.76	0.563
262106488	heat shock 70 kDa protein, mitochondrial precursor [Phytophthora infestans T30-4]	2695.22	0.4755	2	4	24	180	633	68.1	5.1	0.566
348666467	hypothetical protein PHYSODRAFT_341564 [Phytophthora sojae]	72.3	0.0714	1	1	1	3	168	19.3	5.21	0.567
262104358	40S ribosomal protein S7 [Phytophthora infestans T30-4]	1271.91	0.3789	2	9	9	104	190	21.5	9.58	0.568
262101917	nucleolar complex protein, putative [Phytophthora infestans T30-4]	48.93	0.034	2	2	2	2	736	82.8	6.81	0.568
348684334	hypothetical protein PHYSODRAFT_349852 [Phytophthora sojae]	300.02	0.0422	2	3	4	20	1042	112.8	5.1	0.575
348670028	putative carboxylase [Phytophthora sojae]	2780.09	0.3631	2	14	31	223	1176	128.2	6.3	0.576
262103722	MICAL-like protein [Phytophthora infestans T30-4]	130.96	0.0754	1	1	5	6	1034	115.6	8.4	0.577
348670442	hypothetical protein PHYSODRAFT_318565 [Phytophthora sojae]	0	0.1098	1	1	1	1	173	17.9	6	0.577
262099804	40S ribosomal protein S6 [Phytophthora infestans T30-4]	1419.37	0.3264	3	8	8	84	242	27.7	10.74	0.578
348683170	hypothetical protein PHYSODRAFT_284684 [Phytophthora sojae]	664.82	0.6515	1	2	11	62	198	21.9	5.34	0.578
348688220	hypothetical protein PHYSODRAFT_472264 [Phytophthora sojae]	83.37	0.024	1	1	1	4	416	46.9	6.55	0.579
262098012	ribosomal protein L37e, putative [Phytophthora infestans T30-4]	147.36	0.2065	2	3	3	10	92	10.5	11.82	0.58
262099964	4-aminobutyrate aminotransferase, putative [Phytophthora infestans T30-4]	337.81	0.2868	1	2	7	37	408	43.6	5.95	0.581
262098739	electron transfer flavoprotein subunit beta [Phytophthora infestans T30-4]	602.5	0.3546	1	10	10	65	251	27	7.9	0.582
262107718	60S ribosomal protein L6, putative [Phytophthora infestans T30-4]	913.71	0.3182	4	1	8	66	220	24.2	10.52	0.582
262102952	polyadenylate-binding protein 1-B [Phytophthora infestans T30-4]	370.52	0.3656	4	17	17	46	640	69.5	7.99	0.583
348690401	hypothetical protein PHYSODRAFT_553293 [Phytophthora sojae]	135.9	0.1533	2	5	5	15	450	45	4.59	0.583
262094855	ubiquitin-like protein/ribosomal protein [Phytophthora infestans T30-4]	160.71	0.2558	2	3	3	11	86	9.2	11.68	0.584
348671280	hypothetical protein PHYSODRAFT_520447 [Phytophthora sojae]	159.66	0.402	4	4	6	51	296	31.8	5.62	0.584
262098415	conserved hypothetical protein [Phytophthora infestans T30-4]	28.3	0.0211	1	1	1	1	570	62.1	6.38	0.584
262096900	conserved hypothetical protein [Phytophthora infestans T30-4]	0	0.0054	2	1	1	1	2026	221.6	6.15	0.585
348677150	hypothetical protein PHYSODRAFT_503916 [Phytophthora sojae]	1338.48	0.4444	3	5	11	98	333	35.9	6.95	0.586
348669505	hypothetical protein PHYSODRAFT_525100 [Phytophthora sojae]	467.29	0.3917	1	4	17	66	503	54.1	6.93	0.586
348680645	hypothetical protein PHYSODRAFT_285418 [Phytophthora sojae]	100.11	0.2561	1	2	2	11	82	9	8.73	0.586
262104961	aminotransferase, putative [Phytophthora infestans T30-4]	375.46	0.316	2	5	16	41	633	68.8	6.64	0.587
262105929	eukaryotic translation initiation factor 1b, putative [Phytophthora infestans T30-4]	42.31	0.1376	2	1	1	1	109	12.2	5.53	0.587
348673003	hypothetical protein PHYSODRAFT_354912 [Phytophthora sojae]	1560.13	0.3959	1	3	12	93	341	36.4	8.37	0.588
348681629	hypothetical protein PHYSODRAFT_285611 [Phytophthora sojae]	558.09	0.3463	2	1	6	44	205	23.4	10.49	0.588
262102222	Annexin (Annexin) Family [Phytophthora infestans T30-4]	820.32	0.1447	1	2	4	94	304	34	6.7	0.589
348688317	hypothetical protein PHYSODRAFT_353483 [Phytophthora sojae]	960.55	0.4842	4	6	13	98	221	24.3	10.42	0.589
262101796	glutathione transferase, theta class [Phytophthora infestans T30-4]	186.87	0.1195	3	1	3	21	226	25.6	6.68	0.589
262099080	aldehyde dehydrogenase, mitochondrial precursor [Phytophthora infestans T30-4]	2420.16	0.3714	1	3	14	164	525	56.6	5.72	0.59
348687704	hypothetical protein PHYSODRAFT_554034 [Phytophthora sojae]	1794.06	0.3837	1	8	30	180	1058	115.4	5.48	0.591
262099896	nucleoredoxin, putative [Phytophthora infestans T30-4]	35.32	0.1667	2	2	2	5	150	17.3	5.15	0.591
262097915	lysyl-tRNA synthetase [Phytophthora infestans T30-4]	147.32	0.1429	1	3	9	17	651	72.7	6.61	0.592
348675977	hypothetical protein PHYSODRAFT_286387 [Phytophthora sojae]	93.85	0.1888	1	6	6	22	143	16.3	10.67	0.593
348683808	putative transaldolase [Phytophthora sojae]	1660.88	0.5479	2	5	17	146	334	36.8	6.43	0.595
348677085	hypothetical protein PHYSODRAFT_559717 [Phytophthora sojae]	53.54	0.0232	1	1	4	6	2882	320.7	5.34	0.595
348665985	hypothetical protein PHYSODRAFT_551244 [Phytophthora sojae]	120.92	0.1192	1	2	8	17	663	73.6	6.29	0.596
262107515	conserved hypothetical protein [Phytophthora infestans T30-4]	0	0.0431	2	1	1	1	209	23.3	5.73	0.596
348673884	hypothetical protein PHYSODRAFT_514737 [Phytophthora sojae]	97.12	0.0665	11	3	3	11	481	50.7	5.35	0.596
262101106	eukaryotic translation initiation factor 1A, putative [Phytophthora infestans T30-4]	51	0.295	8	3	3	5	139	15.8	5.72	0.596
262110913	glycine amidinotransferase, mitochondrial precursor [Phytophthora infestans T30-4]	330.75	0.1281	1	2	4	16	398	45.7	6.62	0.598
262109462	spermine synthase, putative [Phytophthora infestans T30-4]	289.78	0.1988	1	1	6	16	332	37.2	4.97	0.599
262102893	eukaryotic translation initiation factor 3 subunit G, putative [Phytophthora infestans T30-4]	78.46	0.1631	1	1	5	9	325	35.6	5.87	0.6
262098198	fructokinase, putative [Phytophthora infestans T30-4]	78.17	0.2211	1	2	4	29	294	31.6	6.11	0.6
348669586	hypothetical protein PHYSODRAFT_549026 [Phytophthora sojae]	1572.81	0.3624	1	3	28	162	1090	118.8	6.46	0.602
262112324	conserved hypothetical protein [Phytophthora infestans T30-4]	216.5	0.2516	1	11	11	26	612	66.2	6.15	0.605
348683864	hypothetical protein PHYSODRAFT_353859 [Phytophthora sojae]	58.34	0.15	3	3	3	9	200	22.1	7.18	0.606
262100243	60S ribosomal protein L21-1 [Phytophthora infestans T30-4]	89.27	0.1938	2	3	3	19	160	18.3	11.21	0.609
262107486	conserved hypothetical protein [Phytophthora infestans T30-4]	326.5	0.4375	3	5	5	20	128	14.4	5.31	0.61
262112147	isocitrate dehydrogenase, putative [Phytophthora infestans T30-4]	49.26	0.1256	2	4	5	10	422	47.5	6.42	0.61
348677861	hypothetical protein PHYSODRAFT_501285 [Phytophthora sojae]	258.03	0.1618	1	3	5	28	476	52.2	6.21	0.611
262108284	conserved hypothetical protein [Phytophthora infestans T30-4]	134.27	0.1801	1	4	5	15	272	28.7	5.69	0.611
306530994	RecName: Full=Arginine biosynthesis bifunctional protein ArgJ, mitochondrial; Includes: RecName: Full=Glutamate N-acetyltransferase; Short=GAT; AltName: Full=Ornithine acetyltransferase; Short=OATase; AltName: Full=Ornithine transacetylase; Includes: RecName: Full=Amino-acid acetyltransferase; AltName: Full=N-acetylglutamate synthase; Short=AGS; Contains: RecName: Full=Arginine biosynthesis bifun…	0	0.0495	1	1	2	3	465	50.6	6.64	0.612
348682512	hypothetical protein PHYSODRAFT_490678 [Phytophthora sojae]	24.82	0.0709	1	1	2	3	282	30.6	7.08	0.613
348674959	hypothetical protein PHYSODRAFT_545931 [Phytophthora sojae]	356.49	0.3103	1	3	17	46	464	51.3	6.84	0.614
262103106	D-isomer specific 2-hydroxyacid dehydrogenase, putative [Phytophthora infestans T30-4]	1287.44	0.4114	2	5	11	71	333	36.1	7.05	0.615
262110076	protein kinase [Phytophthora infestans T30-4]	31.63	0.0218	1	1	1	1	550	60.5	5.44	0.615
262099589	mitochondrial-processing peptidase subunit beta [Phytophthora infestans T30-4]	1398.25	0.4657	1	1	18	106	466	51.9	6.15	0.616
348688163	hypothetical protein PHYSODRAFT_353463 [Phytophthora sojae]	1250.44	0.5556	1	1	11	86	189	21.9	9.5	0.616
59894160	heat shock protein 90, partial [Pythium graminicola]	1688.74	0.3042	3	4	16	131	572	65.2	5.35	0.617
262107894	60S ribosomal protein L7a-2 [Phytophthora infestans T30-4]	781.63	0.4905	1	3	14	128	263	29.6	10.43	0.617
262106737	conserved hypothetical protein [Phytophthora infestans T30-4]	184.82	0.2475	2	5	5	21	198	22.6	9.23	0.617
262104423	conserved hypothetical protein [Phytophthora infestans T30-4]	258.81	0.3916	2	8	8	21	263	29.3	8.28	0.618
262095352	isocitrate dehydrogenase, mitochondrial precursor [Phytophthora infestans T30-4]	1060.31	0.4333	1	2	17	113	427	47.9	6.89	0.622
348680594	glyceraldehyde-3-phosphate dehydrogenase [Phytophthora sojae]	990.94	0.4895	3	1	12	107	333	36.1	6.24	0.623
262100000	deoxyhypusine synthase, putative [Phytophthora infestans T30-4]	68.82	0.0794	2	2	2	4	378	42.4	5.87	0.623
348683526	hypothetical protein PHYSODRAFT_284724 [Phytophthora sojae]	569.55	0.4256	2	6	6	46	195	21.1	5.11	0.624
262100928	conserved hypothetical protein [Phytophthora infestans T30-4]	20.62	0.0181	2	1	1	1	554	63.7	9.23	0.625
262101058	metalloprotease family M17, putative [Phytophthora infestans T30-4]	184.75	0.1423	2	6	6	11	534	56.5	6.49	0.626
348676208	hypothetical protein PHYSODRAFT_504765 [Phytophthora sojae]	32.31	0.0833	1	1	4	5	504	55.9	5.57	0.626
262096116	60S ribosomal protein L10a-1 [Phytophthora infestans T30-4]	1920.09	0.3604	1	4	7	131	197	22	9.39	0.627
348680240	hypothetical protein PHYSODRAFT_354260 [Phytophthora sojae]	24.34	0.0319	2	1	1	1	251	28.9	12.04	0.627
348689131	hypothetical protein PHYSODRAFT_552531 [Phytophthora sojae]	55.4	0.0576	2	4	5	8	1146	124.7	5.99	0.627
262096873	hypothetical protein PITG_08495 [Phytophthora infestans T30-4]	0	0.0946	3	1	1	1	148	16.1	10.81	0.627
348680653	hypothetical protein PHYSODRAFT_345470 [Phytophthora sojae]	43.69	0.0193	2	1	1	1	776	82.4	5.36	0.628
262111509	sulfite reductase [NADPH] flavoprotein component, putative [Phytophthora infestans T30-4]	78.73	0.0369	3	2	3	8	1192	130.7	6.25	0.629
348675895	hypothetical protein PHYSODRAFT_546417 [Phytophthora sojae]	226.1	0.2192	2	2	9	23	616	65.9	6.84	0.631
262104130	glutathione reductase [Phytophthora infestans T30-4]	223.33	0.2454	2	10	10	27	493	53.4	6.29	0.631
262095092	40S ribosomal protein S24, putative [Phytophthora infestans T30-4]	260.53	0.2263	2	2	2	29	137	15.7	11.09	0.631
262103665	40S ribosomal protein S8-2 [Phytophthora infestans T30-4]	612.32	0.3286	2	1	6	46	213	24.4	10.77	0.632
262102089	aconitate hydratase, putative [Phytophthora infestans T30-4]	118.62	0.31	2	3	15	23	700	75.3	5.29	0.633
348672383	hypothetical protein PHYSODRAFT_286936 [Phytophthora sojae]	224.19	0.1563	3	1	6	24	352	38.6	5.38	0.634
348674145	hypothetical protein PHYSODRAFT_347096 [Phytophthora sojae]	880.18	0.4324	2	6	17	125	481	52.5	5.4	0.635
262112241	conserved hypothetical protein [Phytophthora infestans T30-4]	111.29	0.0795	2	2	2	6	264	28.8	5.16	0.635
348685015	hypothetical protein PHYSODRAFT_554865 [Phytophthora sojae]	0	0.0169	1	1	1	1	651	72.1	10.01	0.635
348670603	methionine aminopeptidase, merops subfamily M24 [Phytophthora sojae]	267.66	0.2901	1	3	12	35	393	43.4	6.55	0.636
348686784	hypothetical protein PHYSODRAFT_248277 [Phytophthora sojae]	44.86	0.1528	2	2	2	3	144	15	5.6	0.636
262111971	conserved hypothetical protein [Phytophthora infestans T30-4]	42.55	0.0404	1	1	1	3	198	22	8.78	0.637
145932435	cytochrome c oxidase subunit 3 [Phytophthora ramorum]	0	0.0724	1	2	2	4	304	35.1	6.89	0.637
262098711	D-3-phosphoglycerate dehydrogenase [Phytophthora infestans T30-4]	278.54	0.2661	2	1	9	26	466	50.8	8.16	0.639
262099591	conserved hypothetical protein [Phytophthora infestans T30-4]	32.22	0.1658	2	4	4	5	187	20.8	10.1	0.639
262108099	enolase [Phytophthora infestans T30-4]	7472.86	0.4339	3	1	16	492	454	49.1	5.36	0.641
348676569	hypothetical protein PHYSODRAFT_286485 [Phytophthora sojae]	43.45	0.0237	2	1	1	2	253	29.1	7.53	0.641
348671811	hypothetical protein PHYSODRAFT_547617 [Phytophthora sojae]	191.12	0.1445	2	4	4	6	422	46.8	5.5	0.641
262105863	aldo/keto reductase family [Phytophthora infestans T30-4]	72.51	0.0939	1	2	2	3	277	31	6.37	0.641
348674168	hypothetical protein PHYSODRAFT_355036 [Phytophthora sojae]	723.81	0.4487	12	6	7	72	156	17.9	9.74	0.642
348678021	hypothetical protein PHYSODRAFT_501475 [Phytophthora sojae]	202.32	0.16	2	4	4	22	200	20.9	5.52	0.642
262111378	choline/Carnitine O-acyltransferase, putative [Phytophthora infestans T30-4]	145.79	0.1272	2	7	7	15	621	69.7	7.12	0.643
262104533	methylenetetrahydrofolate dehydrogenase [NAD+], putative [Phytophthora infestans T30-4]	139.94	0.3333	14	1	7	13	294	32.5	8.03	0.643
348680599	hypothetical protein PHYSODRAFT_285408 [Phytophthora sojae]	822.35	0.3339	3	1	16	105	602	64.8	6.34	0.644
348686055	hypothetical protein PHYSODRAFT_354100 [Phytophthora sojae]	1058.13	0.5808	1	5	20	130	427	47.8	6.89	0.644
348667991	hypothetical protein PHYSODRAFT_526336 [Phytophthora sojae]	328.14	0.251	1	6	6	23	247	28.4	5.86	0.644
325187848	conserved hypothetical protein [Albugo laibachii Nc14]	34.58	0.0592	1	1	1	3	152	17.4	8.6	0.644
348673537	hypothetical protein PHYSODRAFT_335134 [Phytophthora sojae]	178.42	0.1968	2	5	5	11	310	35.4	5.01	0.644
262105916	T-complex protein 1 subunit theta [Phytophthora infestans T30-4]	165.99	0.3578	2	16	16	22	545	58.6	6.61	0.645
262107653	conserved hypothetical protein [Phytophthora infestans T30-4]	74.26	0.087	1	1	1	3	161	18.6	6.18	0.645
348680732	hypothetical protein PHYSODRAFT_350583 [Phytophthora sojae]	36.03	0.0809	1	2	2	2	235	27.6	4.3	0.645
262095532	60S ribosomal protein L7 [Phytophthora infestans T30-4]	474.2	0.4836	5	2	12	67	244	27.7	10.52	0.646
348673332	hypothetical protein PHYSODRAFT_354938 [Phytophthora sojae]	385.3	0.3485	2	6	17	48	637	69.3	6.54	0.646
262102615	conserved hypothetical protein [Phytophthora infestans T30-4]	66.76	0.1175	2	7	7	8	732	79.2	4.45	0.646
262107664	60S ribosomal protein L35a-4 [Phytophthora infestans T30-4]	150.36	0.4144	3	8	8	31	111	12.4	10.59	0.647
262097374	pyruvate kinase [Phytophthora infestans T30-4]	474.19	0.2146	1	3	8	28	466	50.8	6.74	0.647
348684607	hypothetical protein PHYSODRAFT_344705 [Phytophthora sojae]	6882.64	0.614	8	19	38	404	798	86.5	6.23	0.648
262107956	hsp70-like protein [Phytophthora infestans T30-4]	253.23	0.2197	1	4	8	23	569	61.6	4.67	0.648
348677146	hypothetical protein PHYSODRAFT_502841 [Phytophthora sojae]	944.57	0.4294	2	2	12	71	333	36.2	6.62	0.649
262095747	2,3-bisphosphoglycerate-dependent phosphoglycerate mutase [Phytophthora infestans T30-4]	981.57	0.2846	3	1	6	73	260	29.3	6.98	0.649
262105404	adenylate kinase, putative [Phytophthora infestans T30-4]	99.11	0.1667	2	1	4	13	228	25.1	6.07	0.65
145932373	ribosomal protein S2 [Phytophthora sojae]	34.43	0.101	5	2	2	3	198	23.3	9.91	0.65
262102275	cysteine synthase [Phytophthora infestans T30-4]	522.05	0.2059	1	3	5	45	340	35.8	5.48	0.651
348688153	hypothetical protein PHYSODRAFT_321678 [Phytophthora sojae]	43.46	0.1884	1	1	1	1	69	8	5.41	0.651
262109621	sulfite reductase [NADPH] subunit beta, putative [Phytophthora infestans T30-4]	287.64	0.0832	2	5	10	29	1503	167.4	5.34	0.652
348667135	hypothetical protein PHYSODRAFT_530509 [Phytophthora sojae]	62.97	0.1848	3	5	5	6	422	45.2	5.47	0.652
348675079	hypothetical protein PHYSODRAFT_333201 [Phytophthora sojae]	38.56	0.1091	2	1	1	1	110	13	4.79	0.652
348683007	hypothetical protein PHYSODRAFT_284659 [Phytophthora sojae]	101.98	0.244	2	2	9	16	496	57.5	7.18	0.653
348665746	hypothetical protein PHYSODRAFT_289235 [Phytophthora sojae]	149.36	0.3469	2	4	4	12	98	10.4	5.19	0.653
348673576	hypothetical protein PHYSODRAFT_286607 [Phytophthora sojae]	294.83	0.3506	1	1	8	59	154	17.4	9.55	0.654
262102512	conserved hypothetical protein [Phytophthora infestans T30-4]	39.85	0.1111	1	1	1	1	126	14.3	7.52	0.654
348683892	hypothetical protein PHYSODRAFT_353864 [Phytophthora sojae]	439.72	0.2228	1	3	7	39	368	40.1	5.47	0.656
262102866	NADH dehydrogenase flavoprotein 2, mitochondrial precursor [Phytophthora infestans T30-4]	192.91	0.2472	1	1	5	20	271	30.2	6.16	0.657
348676808	hypothetical protein PHYSODRAFT_498345 [Phytophthora sojae]	163.95	0.1505	3	3	3	8	299	32.5	5.81	0.658
262103702	eukaryotic translation initiation factor 3 subunit A, putative [Phytophthora infestans T30-4]	372.7	0.1265	3	2	12	26	1154	132.4	8.75	0.659
262108110	elongation factor 3, putative [Phytophthora infestans T30-4]	820.21	0.2312	2	19	19	85	1038	115.6	6.49	0.659
348666689	hypothetical protein PHYSODRAFT_566176 [Phytophthora sojae]	309.22	0.4015	1	2	6	23	274	30.5	6.42	0.659
262098159	12-oxophytodienoate reductase, putative [Phytophthora infestans T30-4]	906.31	0.1974	2	2	5	42	304	33.6	6.25	0.661
348682248	hypothetical protein PHYSODRAFT_557837 [Phytophthora sojae]	351.62	0.1697	1	3	17	38	1149	130.1	6.02	0.661
262111245	glutathione S-transferase omega-like protein [Phytophthora infestans T30-4]	86.66	0.2514	1	7	9	20	354	40.6	7.14	0.662
262111492	13 kDa ribonucleoprotein-associated protein [Phytophthora infestans T30-4]	675.2	0.7734	2	6	6	44	128	13.8	6.06	0.662
262103563	60S ribosomal protein L23 [Phytophthora infestans T30-4]	979.94	0.7305	2	10	10	89	141	14.9	10.45	0.663
325182801	PREDICTED: similar to eukaryotic release factor 1 CG5605PA putative [Albugo laibachii Nc14]	141.11	0.1216	1	2	3	6	436	49.1	5.5	0.663
348677639	hypothetical protein PHYSODRAFT_346179 [Phytophthora sojae]	962.77	0.3132	2	2	15	54	530	58.3	5.92	0.664
348680954	membrane alanine aminopeptidase [Phytophthora sojae]	277.82	0.1662	2	1	11	36	981	110	5.83	0.665
348671929	hypothetical protein PHYSODRAFT_355091 [Phytophthora sojae]	308.46	0.5497	4	10	10	55	151	17.3	10.54	0.666
348675375	hypothetical protein PHYSODRAFT_561117 [Phytophthora sojae]	544.92	0.0486	1	2	2	22	329	36.5	8.72	0.666
262110335	60S ribosomal protein L13, putative [Phytophthora infestans T30-4]	317.55	0.4	2	9	9	51	205	23	11.03	0.667
262103493	glucose-6-phosphate isomerase [Phytophthora infestans T30-4]	1280.26	0.3165	2	7	17	127	556	60.7	6.68	0.667
348675830	hypothetical protein PHYSODRAFT_504947 [Phytophthora sojae]	46.82	0.129	2	1	1	8	62	7.3	9.91	0.667
325187519	60S ribosomal protein L31 putative [Albugo laibachii Nc14]	35.78	0.1417	1	1	2	7	120	14.1	10.52	0.667
348690815	anthranilate synthase [Phytophthora sojae]	58.46	0.0909	2	3	3	3	506	55.6	5.57	0.667
262099649	40S ribosomal protein S10 [Phytophthora infestans T30-4]	426.77	0.5903	3	7	7	49	144	16.5	9.82	0.668
262112391	conserved hypothetical protein [Phytophthora infestans T30-4]	27.15	0.0577	1	1	3	4	381	41.7	5.02	0.668
348674599	hypothetical protein PHYSODRAFT_560503 [Phytophthora sojae]	227.77	0.1448	4	1	6	22	525	57.8	7.69	0.669
262098442	6-phosphogluconate dehydrogenase [Phytophthora infestans T30-4]	2202.43	0.454	2	2	20	203	489	53.2	5.52	0.669
348674989	hypothetical protein PHYSODRAFT_560950 [Phytophthora sojae]	84.09	0.1308	2	4	5	13	390	42.3	6.07	0.669
262101818	proliferation-associated protein, metalloprotease family M24X, putative [Phytophthora infestans T30-4]	305.34	0.2697	1	2	11	41	393	43.4	6.93	0.67
348679584	putative aconitate hydratase [Phytophthora sojae]	252.66	0.2073	2	6	11	20	873	94.3	5.99	0.67
262104906	phosducin-like protein [Phytophthora infestans T30-4]	26.36	0.0483	2	1	1	1	207	24.1	4.72	0.67
262105171	branched-chain-amino-acid aminotransferase [Phytophthora infestans T30-4]	42.41	0.0923	3	4	4	10	390	43.5	6.55	0.671
262099189	villin-like protein [Phytophthora infestans T30-4]	91	0.0228	1	1	2	10	879	96.8	5.15	0.671
348676938	hypothetical protein PHYSODRAFT_247517 [Phytophthora sojae]	411.7	0.2242	2	14	14	41	794	87.8	5.14	0.672
348671168	hypothetical protein PHYSODRAFT_317963 [Phytophthora sojae]	38.38	0.2442	1	1	4	5	217	24.4	4.49	0.672
262111352	transaldolase [Phytophthora infestans T30-4]	1070.67	0.4461	1	2	14	112	334	36.7	6.04	0.673
262102113	conserved hypothetical protein [Phytophthora infestans T30-4]	619.8	0.3051	1	2	6	42	177	20.1	7.33	0.673
348680773	hypothetical protein PHYSODRAFT_313196 [Phytophthora sojae]	91.13	0.1229	1	2	4	9	529	57.9	7.37	0.673
262101533	Annexin (Annexin) Family [Phytophthora infestans T30-4]	220.17	0.2305	1	3	5	36	334	37	5.2	0.674
348685044	hypothetical protein PHYSODRAFT_359351 [Phytophthora sojae]	31.34	0.1579	1	2	2	2	114	12.9	8.43	0.675
325191833	conserved hypothetical protein [Albugo laibachii Nc14]	26.57	0.0335	2	1	1	3	239	27.1	7.55	0.675
262097068	50S ribosomal protein L15 [Phytophthora infestans T30-4]	69.49	0.092	2	2	2	5	250	26.8	10.46	0.675
348666294	hypothetical protein PHYSODRAFT_289076 [Phytophthora sojae]	47.69	0.0813	1	1	3	7	406	46.2	6.47	0.677
348673481	hypothetical protein PHYSODRAFT_286588 [Phytophthora sojae]	269.65	0.0901	1	1	1	12	111	11.3	4.34	0.678
348665233	hypothetical protein PHYSODRAFT_353234 [Phytophthora sojae]	30.42	0.0225	2	1	1	1	444	48.9	9.04	0.679
262098281	prolyl-tRNA synthetase, putative [Phytophthora infestans T30-4]	298.34	0.2251	2	4	14	33	764	86.1	6.74	0.679
262108350	acetyltransferase (GNAT) family, putative [Phytophthora infestans T30-4]	0	0.0784	2	1	1	1	153	17.3	5.41	0.679
321695629	60S ribosomal protein L10 [Phytophthora sp. P1896]	630.21	0.5789	33	1	12	72	152	17	10.37	0.68
262102983	conserved hypothetical protein [Phytophthora infestans T30-4]	35.25	0.0159	1	1	1	3	502	57.6	8.46	0.68
262110768	ATP-citrate synthase [Phytophthora infestans T30-4]	1976.72	0.3914	1	7	32	180	1091	118.8	6.49	0.68
348690938	hypothetical protein PHYSODRAFT_353780 [Phytophthora sojae]	648.87	0.3671	3	7	12	42	493	55	6.52	0.681
348686593	hypothetical protein PHYSODRAFT_327318 [Phytophthora sojae]	26.82	0.0056	1	1	1	1	1074	113.3	9.72	0.681
262097860	conserved hypothetical protein [Phytophthora infestans T30-4]	660.62	0.0729	1	2	4	36	494	54	5.08	0.681
348677366	hypothetical protein PHYSODRAFT_354552 [Phytophthora sojae]	93.07	0.1955	3	3	3	10	179	20.1	4.48	0.681
348677814	hypothetical protein PHYSODRAFT_331569 [Phytophthora sojae]	60.9	0.0255	2	2	2	5	785	90.5	8.79	0.684
348690746	hypothetical protein PHYSODRAFT_284634 [Phytophthora sojae]	0	0.1395	1	1	1	3	129	15.2	9.94	0.684
348690078	hypothetical protein PHYSODRAFT_284531 [Phytophthora sojae]	386.16	0.2327	3	1	4	20	245	27.2	5.02	0.685
262107220	elongation factor Tu [Phytophthora infestans T30-4]	379.41	0.522	1	2	7	30	182	19.7	6.8	0.685
145932374	ribosomal protein S4 [Phytophthora sojae]	34.18	0.0523	1	1	1	1	153	18.9	10.71	0.685
145932364	ribosomal protein L2 [Phytophthora sojae]	45.89	0.041	3	1	1	2	268	29.9	11.19	0.685
262102889	cell division protein ftsZ [Phytophthora infestans T30-4]	42.77	0.032	1	1	1	1	469	49.8	8.75	0.686
262099183	conserved hypothetical protein [Phytophthora infestans T30-4]	91.51	0.1184	1	1	1	10	152	16	5.48	0.686
348682681	hypothetical protein PHYSODRAFT_360256 [Phytophthora sojae]	34.25	0.0542	1	2	2	2	369	39.9	5.76	0.687
262105995	T-complex protein 1 subunit alpha [Phytophthora infestans T30-4]	636.77	0.4652	1	1	18	43	546	59.2	5.44	0.687
348684859	hypothetical protein PHYSODRAFT_344769 [Phytophthora sojae]	270.21	0.1531	1	3	10	27	751	83	8.09	0.687
262101774	alanyl-tRNA synthetase, mitochondrial precursor [Phytophthora infestans T30-4]	115.04	0.1439	1	2	9	22	980	108.6	6.01	0.687
262097894	conserved hypothetical protein [Phytophthora infestans T30-4]	58.52	0.0667	2	1	1	1	270	28.8	5.3	0.687
348686832	hypothetical protein PHYSODRAFT_353332 [Phytophthora sojae]	2085.9	0.4606	1	6	10	126	317	34.4	4.74	0.688
262110041	3-isopropylmalate dehydratase large subunit, putative [Phytophthora infestans T30-4]	100.78	0.121	2	1	6	15	711	76.4	5.69	0.688
348685257	hypothetical protein PHYSODRAFT_350059 [Phytophthora sojae]	152.08	0.128	1	3	3	8	289	31.1	4.79	0.689
262100364	ran-specific GTPase-activating protein, putative [Phytophthora infestans T30-4]	85.55	0.1912	1	1	3	10	204	23	5.11	0.689
262104811	histidinol dehydrogenase, putative [Phytophthora infestans T30-4]	60.18	0.1096	2	3	3	9	456	47.6	5.6	0.689
348670702	hypothetical protein PHYSODRAFT_355273 [Phytophthora sojae]	484.86	0.4276	3	7	7	53	145	16.1	10.59	0.69
358246133	triosephosphate isomerase/glyceraldehyde-3-phosphate dehydrogenase, partial [Phytophthora austrocedri]	214.67	0.2757	2	1	11	51	526	56.1	6.19	0.69
348676381	hypothetical protein PHYSODRAFT_545686 [Phytophthora sojae]	304.85	0.2079	1	1	16	36	933	101.2	5.94	0.69
262111868	pyruvate carboxylase, putative [Phytophthora infestans T30-4]	430.85	0.2463	1	2	3	35	203	21.8	5.16	0.69
262100233	conserved hypothetical protein [Phytophthora infestans T30-4]	40.28	0.0794	1	3	3	3	428	45.5	5.43	0.69
262110823	conserved hypothetical protein [Phytophthora infestans T30-4]	95.2	0.1765	2	1	1	2	85	9.9	5.54	0.69
262107775	60S ribosomal protein L17-2 [Phytophthora infestans T30-4]	693.41	0.3842	4	6	6	79	190	20.9	10.26	0.691
348678010	hypothetical protein PHYSODRAFT_331756 [Phytophthora sojae]	122.73	0.3305	2	7	7	18	239	26.8	9.22	0.691
325182383	sporangia induced conserved hypothetical protein [Albugo laibachii Nc14]	33.94	0.017	1	1	1	1	530	59.8	8.22	0.691
262109741	fatty acid synthase subunit alpha, putative [Phytophthora infestans T30-4]	1196.45	0.2079	5	16	61	138	4123	448.4	5.63	0.692
348673403	monooxygenase [Phytophthora sojae]	260.07	0.1988	1	2	7	21	483	51.7	6.8	0.692
348668975	hypothetical protein PHYSODRAFT_352697 [Phytophthora sojae]	529.28	0.2306	2	3	25	73	1570	172.5	6.84	0.693
262110540	conserved hypothetical protein [Phytophthora infestans T30-4]	205.24	0.1833	2	2	2	12	180	20.1	4.63	0.693
262095707	conserved hypothetical protein [Phytophthora infestans T30-4]	50.36	0.0711	2	2	2	2	436	47.9	6.29	0.693
348670408	hypothetical protein PHYSODRAFT_549399 [Phytophthora sojae]	121.64	0.1961	2	3	9	20	464	49.7	6.79	0.694
262100327	60S ribosomal protein L22, putative [Phytophthora infestans T30-4]	332.11	0.384	2	4	4	48	125	14.3	9.31	0.694
348679847	zinc-dependent alcohol dehydrogenase [Phytophthora sojae]	261.41	0.3277	2	5	12	39	412	44.3	7.28	0.695
262098734	alcohol dehydrogenase, putative [Phytophthora infestans T30-4]	244.48	0.4053	2	3	14	34	412	44.4	7.28	0.695
262099682	phenylalanyl-tRNA synthetase beta chain [Phytophthora infestans T30-4]	179.44	0.2248	2	10	10	23	614	68.9	5.19	0.695
348674088	hypothetical protein PHYSODRAFT_335613 [Phytophthora sojae]	82.83	0.1419	1	3	5	11	437	48.2	6.65	0.696
348690755	hypothetical protein PHYSODRAFT_553558 [Phytophthora sojae]	313.03	0.2593	2	11	11	23	540	59.4	5.77	0.697
262096433	conserved hypothetical protein [Phytophthora infestans T30-4]	36.43	0.0255	2	1	1	3	431	47.5	5.87	0.697
348690304	hypothetical protein PHYSODRAFT_353730 [Phytophthora sojae]	638.96	0.4423	7	2	13	79	208	23.5	10.2	0.698
348666498	hypothetical protein PHYSODRAFT_356144 [Phytophthora sojae]	576.35	0.5479	2	1	16	127	261	29.7	10.07	0.699
348680758	hypothetical protein PHYSODRAFT_359947 [Phytophthora sojae]	107.48	0.091	1	6	7	13	1307	142.5	5.58	0.699
145932363	ribosomal protein S13 [Phytophthora sojae]	33.22	0.146	8	2	2	3	137	16.2	10.77	0.7
262111126	methylenetetrahydrofolate reductase, putative [Phytophthora infestans T30-4]	0	0.0288	1	1	1	1	591	66	5.99	0.7
348673781	hypothetical protein PHYSODRAFT_354996 [Phytophthora sojae]	201.88	0.2617	3	2	8	21	298	33.2	9.82	0.704
262100990	eukaryotic translation initiation factor 3 subunit, putative [Phytophthora infestans T30-4]	114.51	0.0465	1	3	4	9	1289	141.8	5.97	0.704
262106062	pyruvate dehydrogenase [lipoamide] [Phytophthora infestans T30-4]	105.03	0.1158	2	3	3	13	380	41.7	6.47	0.704
262111259	nucleolar protein Nop56 [Phytophthora infestans T30-4]	294.04	0.2257	2	1	8	24	514	57.2	9.31	0.706
348688268	hypothetical protein PHYSODRAFT_258189 [Phytophthora sojae]	26.57	0.1809	3	1	5	7	293	32.9	5.11	0.707
262106022	glutamate decarboxylase [Phytophthora infestans T30-4]	253.69	0.3194	1	2	7	19	360	39.9	6.8	0.707
262095320	inosine-5'-monophosphate dehydrogenase 2 [Phytophthora infestans T30-4]	153.95	0.1326	1	1	6	14	528	57.2	8.43	0.707
325186976	60S ribosomal protein L11 putative [Albugo laibachii Nc14]	118.64	0.1	1	1	1	16	100	11.5	9.6	0.707
348690059	hypothetical protein PHYSODRAFT_476935 [Phytophthora sojae]	92.14	0.0811	2	3	3	4	481	54	8.68	0.707
348684075	hypothetical protein PHYSODRAFT_349787 [Phytophthora sojae]	303.9	0.3767	2	10	10	27	292	31	5.92	0.71
145932459	ATP synthase F0 subunit 8 [Phytophthora ramorum]	35.09	0.0615	1	1	1	4	130	16.2	10.07	0.71
262104217	enolase [Phytophthora infestans T30-4]	526.9	0.4158	2	6	14	63	457	48.8	6.39	0.711
262111277	D-lactate dehydrogenase, putative [Phytophthora infestans T30-4]	388.92	0.1951	1	3	7	32	492	52.7	5.53	0.711
348676385	hypothetical protein PHYSODRAFT_560711 [Phytophthora sojae]	69.86	0.1565	1	4	6	7	428	45.1	6.46	0.711
348690653	hypothetical protein PHYSODRAFT_538440 [Phytophthora sojae]	51.85	0.011	2	1	1	2	1179	131.8	8.68	0.711
262110584	T-complex protein 1 subunit beta [Phytophthora infestans T30-4]	481.13	0.327	3	14	14	35	526	56.8	5.95	0.712
262099566	40S ribosomal protein S12, putative [Phytophthora infestans T30-4]	834.97	0.7899	3	10	10	99	138	15.1	5.38	0.712
262107306	conserved hypothetical protein [Phytophthora infestans T30-4]	119.47	0.0843	1	5	6	9	878	95.9	7.15	0.712
262106150	glutaredoxin [Phytophthora infestans T30-4]	0	0.072	1	1	1	1	125	13.7	7.02	0.713
262097282	ornithine aminotransferase, mitochondrial precursor [Phytophthora infestans T30-4]	359.24	0.3634	2	6	10	53	432	47.7	8.27	0.713
348668898	hypothetical protein PHYSODRAFT_564655 [Phytophthora sojae]	141.98	0.1143	1	2	9	15	1032	116.1	6.68	0.713
348673131	hypothetical protein PHYSODRAFT_561807 [Phytophthora sojae]	30.1	0.0217	2	1	1	1	736	80.6	4.98	0.713
348681143	hypothetical protein PHYSODRAFT_259407 [Phytophthora sojae]	610.65	0.2555	2	7	13	118	685	74.2	6.61	0.714
262103954	nicotinate phosphoribosyltransferase, putative [Phytophthora infestans T30-4]	89.3	0.1351	2	5	5	11	533	59.1	6.39	0.714
348683539	14-3-3-like protein [Phytophthora sojae]	2002.54	0.8193	2	17	17	190	249	28.5	4.73	0.714
348680728	hypothetical protein PHYSODRAFT_354317 [Phytophthora sojae]	92.78	0.1799	2	3	3	12	189	20.7	4.91	0.714
348684264	hypothetical protein PHYSODRAFT_284842 [Phytophthora sojae]	122.63	0.1949	1	1	3	9	272	30.2	6.01	0.714
300828062	ATP synthase F0 subunit 9 (mitochondrion) [Phytophthora infestans]	436.76	0.1333	3	1	1	21	75	7.8	8.24	0.716
348683354	hypothetical protein PHYSODRAFT_482691 [Phytophthora sojae]	735.76	0.3756	1	5	8	84	197	22.1	9.47	0.716
348690126	hypothetical protein PHYSODRAFT_353704 [Phytophthora sojae]	707.72	0.3784	2	7	7	50	148	16.5	10.43	0.716
262095562	60S ribosomal protein L35 [Phytophthora infestans T30-4]	171.52	0.3171	2	5	5	19	123	14.2	11.14	0.717
348678964	hypothetical protein PHYSODRAFT_286116 [Phytophthora sojae]	1230.98	0.5556	2	7	7	71	135	15	10.32	0.717
262096665	conserved hypothetical protein [Phytophthora infestans T30-4]	61.79	0.0435	2	1	1	2	207	22.6	9.61	0.717
348674150	hypothetical protein PHYSODRAFT_355034 [Phytophthora sojae]	162.7	0.1358	2	3	3	13	243	27.7	4.51	0.717
262099105	elongation factor 1-gamma, putative [Phytophthora infestans T30-4]	689.78	0.3399	1	6	12	53	406	45.9	5.59	0.718
262099977	urease, putative [Phytophthora infestans T30-4]	55.41	0.0808	1	1	5	6	842	90.1	6.48	0.719
399764569	ASF1-like protein, partial [Phytophthora thermophila x amnicola]	26.36	0.1101	5	1	1	1	109	12.2	4.22	0.719
262099011	hypothetical protein PITG_20686 [Phytophthora infestans T30-4]	0	0.1667	2	1	1	2	90	10.2	10.9	0.719
348677518	hypothetical protein PHYSODRAFT_285912 [Phytophthora sojae]	380.07	0.4259	1	7	7	50	162	17.9	4.98	0.72
262099848	conserved hypothetical protein [Phytophthora infestans T30-4]	183.37	0.5114	1	4	4	24	88	9.6	8.31	0.72
262098052	succinyl-CoA ligase beta-chain, mitochondrial precursor [Phytophthora infestans T30-4]	1460.9	0.428	1	3	19	121	507	54.8	6.65	0.721
348672147	hypothetical protein PHYSODRAFT_286907 [Phytophthora sojae]	538.67	0.3107	1	1	5	41	177	20.1	7.85	0.722
262106043	CTP synthase, putative [Phytophthora infestans T30-4]	53.96	0.1047	2	5	5	7	602	66.7	6.34	0.722
262096831	cystathionine gamma-lyase [Phytophthora infestans T30-4]	199.67	0.1103	1	3	4	12	408	44.1	6.57	0.723
348684161	hypothetical protein PHYSODRAFT_541581 [Phytophthora sojae]	0	0.0444	1	3	3	6	789	87.3	6.51	0.723
262101071	hypothetical cleavage-induced protein [Phytophthora infestans T30-4]	59.3	0.0979	1	1	3	5	429	47	5.38	0.724
262107842	GTPase, putative [Phytophthora infestans T30-4]	235.2	0.2974	1	3	8	19	390	43.6	7.5	0.724
348687572	putative arginine N-methyltransferase [Phytophthora sojae]	0	0.0637	1	1	2	2	377	42.6	4.97	0.724
262107305	conserved hypothetical protein [Phytophthora infestans T30-4]	53.47	0.0085	1	1	1	2	2356	267.3	8.79	0.724
262103399	transketolase [Phytophthora infestans T30-4]	492.51	0.1537	1	4	10	44	696	75.5	6.8	0.725
348668926	hypothetical protein PHYSODRAFT_549587 [Phytophthora sojae]	2895.92	0.5069	2	5	26	203	576	60.4	5.31	0.725
348689017	hypothetical protein PHYSODRAFT_473521 [Phytophthora sojae]	237.05	0.1356	1	4	11	26	981	108.6	5.88	0.725
262108972	S-adenosylmethionine synthetase 2 [Phytophthora infestans T30-4]	178.53	0.3402	2	10	10	26	391	42.9	5.52	0.725
348688625	hypothetical protein PHYSODRAFT_476244 [Phytophthora sojae]	42.49	0.0894	1	2	4	6	492	54.4	5.87	0.725
348672108	hypothetical protein PHYSODRAFT_347295 [Phytophthora sojae]	232.64	0.1363	2	10	10	22	895	98.3	6.23	0.727
262110753	acetyl-CoA carboxylase, putative [Phytophthora infestans T30-4]	743.46	0.2145	3	5	36	75	2326	258.8	5.95	0.727
262111264	carbon-nitrogen hydrolase, putative [Phytophthora infestans T30-4]	458.95	0.3814	1	2	9	39	312	34.2	7.84	0.727
348676782	hypothetical protein PHYSODRAFT_285809 [Phytophthora sojae]	0	0.1132	1	1	1	2	106	11.9	10.2	0.727
348685946	hypothetical protein PHYSODRAFT_480661 [Phytophthora sojae]	262.92	0.1842	1	2	7	17	532	57.8	8.7	0.728
348686788	hypothetical protein PHYSODRAFT_536781 [Phytophthora sojae]	86.11	0.1288	1	1	6	12	846	94.1	4.94	0.728
348673598	hypothetical protein PHYSODRAFT_286616 [Phytophthora sojae]	318.29	0.2137	2	2	2	32	117	13	4.88	0.728
262112192	proteasome subunit beta, putative [Phytophthora infestans T30-4]	64.26	0.1948	1	3	3	6	231	26.3	6.54	0.73
348684065	hypothetical protein PHYSODRAFT_344556 [Phytophthora sojae]	84.35	0.1996	1	1	7	15	456	49.3	7.5	0.73
262105574	electron transfer flavoprotein-ubiquinone oxidoreductase, putative [Phytophthora infestans T30-4]	373.68	0.2115	1	4	11	36	610	67	5.72	0.73
262104572	proliferating cell nuclear antigen [Phytophthora infestans T30-4]	244.9	0.4093	3	8	8	22	259	28.1	4.75	0.73
348677081	hypothetical protein PHYSODRAFT_314508 [Phytophthora sojae]	0	0.0298	1	1	1	1	1142	122.7	6.14	0.731
348686543	hypothetical protein PHYSODRAFT_327273 [Phytophthora sojae]	39.69	0.1619	1	1	3	5	278	29.5	9.61	0.732
262110651	NADH-cytochrome b5 reductase, putative [Phytophthora infestans T30-4]	64.79	0.1351	1	1	4	12	296	32.4	7.25	0.732
348672244	hypothetical protein PHYSODRAFT_286921 [Phytophthora sojae]	272.12	0.2556	1	1	3	49	133	15	5.16	0.732
348665562	N-5'phosphoribosyl anthranilate isomerase/indole-3-glycerol phosphate synthase [Phytophthora sojae]	70.98	0.0677	1	2	3	4	561	60.2	5.41	0.733
262109379	Mitochondrial Carrier (MC) Family [Phytophthora infestans T30-4]	0	0.0375	2	1	1	1	293	31.8	9.52	0.733
348685964	hypothetical protein PHYSODRAFT_350197 [Phytophthora sojae]	403.12	0.2783	3	10	10	41	557	63.5	5.35	0.734
348685377	hypothetical protein PHYSODRAFT_326255 [Phytophthora sojae]	21.7	0.0535	2	2	2	2	355	40.1	6.47	0.735
262111767	conserved hypothetical protein [Phytophthora infestans T30-4]	53.78	0.0524	1	1	1	4	382	39	4.35	0.735
348686393	hypothetical protein PHYSODRAFT_285170 [Phytophthora sojae]	867.27	0.4695	3	6	6	54	213	24.1	6.34	0.737
118572299	RecName: Full=Elicitin-like protein 2; Flags: Precursor	0	0.0427	2	1	1	1	164	16.5	5.4	0.737
348666687	hypothetical protein PHYSODRAFT_406507 [Phytophthora sojae]	240.86	0.3511	3	3	3	37	94	10.8	10.56	0.738
262097375	pyruvate kinase [Phytophthora infestans T30-4]	540.48	0.4333	1	3	15	72	457	49.3	7.69	0.738
262109461	elongation factor Ts, putative [Phytophthora infestans T30-4]	152.3	0.2896	2	6	6	16	335	35.7	6.81	0.738
262104465	prefoldin subunit, putative [Phytophthora infestans T30-4]	28.07	0.1014	1	1	1	3	148	16.6	4.86	0.738
348689136	hypothetical protein PHYSODRAFT_552537 [Phytophthora sojae]	220.47	0.074	2	6	11	26	1501	166.4	5.49	0.739
348670645	hypothetical protein PHYSODRAFT_287071 [Phytophthora sojae]	178.68	0.1244	4	1	3	22	225	25.2	6.27	0.74
262097468	prefoldin subunit 2, putative [Phytophthora infestans T30-4]	71.84	0.1964	2	2	2	5	112	13	6.57	0.74
348671573	hypothetical protein PHYSODRAFT_318112 [Phytophthora sojae]	44.72	0.011	1	2	2	2	2460	278.3	9.19	0.74
348684537	hypothetical protein PHYSODRAFT_344687 [Phytophthora sojae]	146.18	0.1876	3	2	7	13	533	59	6.07	0.74
348683995	hypothetical protein PHYSODRAFT_344537 [Phytophthora sojae]	148.37	0.162	1	1	10	16	858	93.8	4.55	0.741
262100869	glu/Leu/Phe/Val dehydrogenase family, putative [Phytophthora infestans T30-4]	158.5	0.1125	2	2	9	17	1031	115.8	6.47	0.741
348672304	hypothetical protein PHYSODRAFT_317375 [Phytophthora sojae]	267.83	0.1204	1	4	5	22	465	49.6	6.1	0.741
348688828	hypothetical protein PHYSODRAFT_353568 [Phytophthora sojae]	0	0.2601	1	3	3	4	173	19.4	5.4	0.742
348688976	hypothetical protein PHYSODRAFT_353589 [Phytophthora sojae]	2581.15	0.3566	2	12	12	162	387	42.5	11.15	0.743
348675955	hypothetical protein PHYSODRAFT_354820 [Phytophthora sojae]	35.95	0.2313	1	2	2	8	147	16.4	5.86	0.743
348669360	hypothetical protein PHYSODRAFT_355945 [Phytophthora sojae]	227	0.1458	1	1	5	17	432	47.6	7.93	0.743
262096147	myosin-like protein [Phytophthora infestans T30-4]	31.12	0.0259	2	2	2	4	771	84.3	6.21	0.744
348685957	hypothetical protein PHYSODRAFT_555469 [Phytophthora sojae]	203.52	0.1477	1	2	12	17	1124	126	5.69	0.744
262106550	conserved hypothetical protein [Phytophthora infestans T30-4]	146.92	0.1023	1	1	4	16	342	36.8	6.95	0.744
348667012	hypothetical protein PHYSODRAFT_530188 [Phytophthora sojae]	48.77	0.121	3	2	2	2	281	30.6	5.43	0.744
348686500	hypothetical protein PHYSODRAFT_371197 [Phytophthora sojae]	113.55	0.0981	3	4	5	7	540	60	4.68	0.745
262104006	isochorismatase, putative [Phytophthora infestans T30-4]	99.64	0.3062	2	3	3	9	209	23	7.5	0.745
348670385	hypothetical protein PHYSODRAFT_355846 [Phytophthora sojae]	39.44	0.1751	2	2	2	3	177	19.4	10.9	0.745
348684718	hypothetical protein PHYSODRAFT_481340 [Phytophthora sojae]	280.17	0.3547	1	7	15	34	530	58.2	5.96	0.746
348684343	hypothetical protein PHYSODRAFT_482317 [Phytophthora sojae]	0	0.0721	1	2	2	3	333	36.8	9.57	0.746
348672777	hypothetical protein PHYSODRAFT_361579 [Phytophthora sojae]	41.86	0.1684	1	2	4	5	297	34.4	5.44	0.747
262104764	phosphate acetyltransferase [Phytophthora infestans T30-4]	135.47	0.2181	1	4	10	18	761	83.1	6.46	0.747
348671947	hypothetical protein PHYSODRAFT_336266 [Phytophthora sojae]	89.04	0.1974	1	1	1	18	76	8.2	9.41	0.747
348681570	hypothetical protein PHYSODRAFT_350735 [Phytophthora sojae]	1731.94	0.3624	1	6	49	168	1719	193.9	5.53	0.749
348681633	hypothetical protein PHYSODRAFT_488933 [Phytophthora sojae]	59.71	0.0424	2	2	2	3	542	60.4	8.94	0.749
262100033	conserved hypothetical protein [Phytophthora infestans T30-4]	30.77	0.2288	2	3	3	8	153	17	5.53	0.749
348680216	hypothetical protein PHYSODRAFT_354258 [Phytophthora sojae]	523.12	0.2228	2	3	3	21	202	22	5.16	0.749
348689661	hypothetical protein PHYSODRAFT_468557 [Phytophthora sojae]	77.6	0.1024	1	2	2	4	254	28.3	5.43	0.75
262102764	ATP-binding Cassette (ABC) Superfamily [Phytophthora infestans T30-4]	135.09	0.0304	41	1	3	6	1350	151.9	6.74	0.75
348666032	hypothetical protein PHYSODRAFT_566368 [Phytophthora sojae]	35.1	0.0254	3	1	1	1	394	42.1	9.41	0.75
348688589	hypothetical protein PHYSODRAFT_471015 [Phytophthora sojae]	509.52	0.1148	1	1	8	26	1080	117.4	4.67	0.751
348669613	acetyl-co-A carboxylase [Phytophthora sojae]	675.61	0.2078	3	4	35	69	2310	257.1	5.97	0.751
262109647	pentafunctional AROM polypeptide, putative [Phytophthora infestans T30-4]	65.07	0.031	2	3	3	3	1548	167.7	6.47	0.751
262106050	conserved hypothetical protein [Phytophthora infestans T30-4]	43.22	0.0857	1	2	2	3	315	35.5	6.8	0.751
262107909	exportin-2-like protein [Phytophthora infestans T30-4]	53.66	0.0423	1	4	4	7	969	109.7	5.29	0.752
262107755	conserved hypothetical protein [Phytophthora infestans T30-4]	113.77	0.1295	1	3	4	14	278	30	9.45	0.752
262108117	voltage-gated potassium channel subunit beta, putative [Phytophthora infestans T30-4]	878.76	0.4269	3	3	14	96	349	39.5	6.89	0.753
348680022	hypothetical protein PHYSODRAFT_496117 [Phytophthora sojae]	283.55	0.1479	2	3	18	32	1494	163.5	5.47	0.753
262099312	DnaJ subfamily C protein [Phytophthora infestans T30-4]	88.4	0.142	1	3	6	13	507	55.5	8.57	0.753
262100267	mannitol dehydrogenase, putative [Phytophthora infestans T30-4]	327.36	0.3059	4	9	9	30	353	38.1	6.55	0.754
325191389	autoinhibited H+ ATPase putative [Albugo laibachii Nc14]	417.24	0.0504	1	1	2	11	1072	117.3	5.17	0.754
262109907	UDP-glucose 6-dehydrogenase [Phytophthora infestans T30-4]	255.77	0.2926	2	2	12	23	475	52.4	5.91	0.755
348673406	hypothetical protein PHYSODRAFT_259204 [Phytophthora sojae]	33.32	0.1437	2	5	5	5	348	39.8	4.77	0.755
262096174	conserved hypothetical protein [Phytophthora infestans T30-4]	0	0.1042	1	1	1	3	96	10.8	5.91	0.756
262105975	ubiquitin carboxyl-terminal hydrolase, putative [Phytophthora infestans T30-4]	65.85	0.0199	1	1	1	2	854	93.6	5.17	0.756
262105002	serine hydroxymethyltransferase 1, mitochondrial precursor [Phytophthora infestans T30-4]	323	0.3725	2	6	20	53	502	55.7	7.28	0.758
348685316	hypothetical protein PHYSODRAFT_540021 [Phytophthora sojae]	59.18	0.121	2	5	5	9	463	48.1	5.02	0.758
348671598	hypothetical protein PHYSODRAFT_519060 [Phytophthora sojae]	200.6	0.096	2	2	2	4	354	37	6.38	0.758
262112028	adenylyl cyclase-associated protein, putative [Phytophthora infestans T30-4]	97.71	0.1797	1	2	8	19	462	49.6	5.96	0.759
348677915	hypothetical protein PHYSODRAFT_498780 [Phytophthora sojae]	157.69	0.2237	2	1	9	16	541	59.7	8.09	0.759
348689639	hypothetical protein PHYSODRAFT_284463 [Phytophthora sojae]	51.72	0.3438	2	2	2	9	64	7	9.99	0.76
262110877	deoxyribose-phosphate aldolase 1 [Phytophthora infestans T30-4]	35.76	0.1014	5	1	1	1	138	14.2	7.14	0.76
348685181	hypothetical protein PHYSODRAFT_285013 [Phytophthora sojae]	904.73	0.4789	2	15	15	121	261	29.5	9.69	0.761
348683825	putative dehydratase [Phytophthora sojae]	42.79	0.1091	2	2	3	4	385	42.3	6.67	0.762
262097996	60S ribosomal protein L12, putative [Phytophthora infestans T30-4]	627.08	0.4848	1	1	8	45	165	17.5	9.26	0.762
262101370	phosphoribosylformylglycinamidine synthase [Phytophthora infestans T30-4]	190.27	0.1089	3	11	11	22	1332	145.6	6.15	0.762
348680632	hypothetical protein PHYSODRAFT_354294 [Phytophthora sojae]	268.94	0.1232	1	1	4	21	341	36.6	6.57	0.762
262101498	ATPase family AAA domain-containing protein 3A [Phytophthora infestans T30-4]	352.1	0.1952	2	8	8	20	584	65.8	9.07	0.763
262097341	40S ribosomal protein S5-2 [Phytophthora infestans T30-4]	1358.91	0.4592	2	11	11	83	196	21.8	10.02	0.764
262095461	40S ribosomal protein S15 [Phytophthora infestans T30-4]	301.27	0.1548	2	2	2	26	155	17.6	10.33	0.764
325182083	proteasome subunit beta type7 putative [Albugo laibachii Nc14]	65.22	0.1656	1	1	3	5	320	35.1	6.33	0.764
262107270	2-oxoglutarate dehydrogenase E1 component, putative [Phytophthora infestans T30-4]	208.9	0.1994	2	4	18	39	1043	117.7	6.43	0.765
262111891	eukaryotic translation initiation factor 3 subunit, putative [Phytophthora infestans T30-4]	33.25	0.0819	4	6	6	7	696	80.3	6.6	0.765
348682699	hypothetical protein PHYSODRAFT_249510 [Phytophthora sojae]	60.16	0.1506	8	2	5	12	352	38.7	6.11	0.765
325185839	AlNc14C92G5715 [Albugo laibachii Nc14]	0	0.0672	1	1	1	1	134	15.4	5.34	0.765
348677990	hypothetical protein PHYSODRAFT_285972 [Phytophthora sojae]	136.55	0.215	6	5	5	20	200	21	5.82	0.765
262097525	ubiquitin carboxyl-terminal hydrolase, putative [Phytophthora infestans T30-4]	46.53	0.0253	1	1	1	2	316	35.3	4.79	0.765
254576457	NADH dehydrogenase subunit I, partial (mitochondrion) [Phytophthora sp. CCH-2009b]	120.33	0.123	91	2	2	5	252	27.8	5.41	0.765
262099081	elongation factor 2 [Phytophthora infestans T30-4]	8524.12	0.5215	1	17	43	615	859	95.6	6.4	0.767
348686434	hypothetical protein PHYSODRAFT_327163 [Phytophthora sojae]	23.39	0.0654	1	1	1	1	107	12.4	5.66	0.767
262106149	acetolactate synthase, mitochondrial precursor [Phytophthora infestans T30-4]	353.23	0.1728	1	3	8	25	648	71	7.74	0.767
348676275	hypothetical protein PHYSODRAFT_506421 [Phytophthora sojae]	81.78	0.1111	2	2	2	2	189	20.4	5.91	0.767
348682080	hypothetical protein PHYSODRAFT_557759 [Phytophthora sojae]	265.44	0.211	2	3	13	28	711	80	6.57	0.768
348678041	hypothetical protein PHYSODRAFT_502603 [Phytophthora sojae]	149.87	0.0813	1	1	5	6	1046	116.3	8.06	0.769
262105959	elongator complex protein, putative [Phytophthora infestans T30-4]	34.94	0.0132	1	1	1	2	684	77.1	7.25	0.769
262102722	40S ribosomal protein S4 [Phytophthora infestans T30-4]	522.5	0.5364	2	1	16	122	261	29.7	10.07	0.77
348687231	hypothetical protein PHYSODRAFT_348851 [Phytophthora sojae]	101.43	0.123	1	2	5	8	504	56.9	8.9	0.77
348687213	hypothetical protein PHYSODRAFT_293130 [Phytophthora sojae]	0	0.0121	1	1	1	7	906	103.9	6.49	0.77
348678889	hypothetical protein PHYSODRAFT_315309 [Phytophthora sojae]	28.56	0.0228	1	1	1	1	571	62.7	6.04	0.77
348681177	hypothetical protein PHYSODRAFT_285540 [Phytophthora sojae]	97.41	0.1628	3	2	2	9	172	19	8.43	0.77
262111175	importin subunit beta, putative [Phytophthora infestans T30-4]	222.82	0.1946	1	3	12	20	858	94	4.59	0.771
348688999	hypothetical protein PHYSODRAFT_284351 [Phytophthora sojae]	104.5	0.2641	2	3	10	29	462	51.5	5.19	0.771
262100860	heat shock cognate 70 kDa protein [Phytophthora infestans T30-4]	8603.22	0.617	3	21	39	453	786	86.6	5.54	0.773
262099551	threonine dehydratase, mitochondrial precursor [Phytophthora infestans T30-4]	73.28	0.0784	1	1	3	7	485	53	8.94	0.773
262099531	ribosome biogenesis protein NEP1, putative [Phytophthora infestans T30-4]	100.44	0.0698	2	1	1	2	215	24.2	9.25	0.773
346652138	threonyl-tRNA synthase [Phytophthora sojae]	496.38	0.2608	2	3	16	50	744	83.6	6.67	0.774
262102403	electron transfer flavoprotein subunit alpha, mitochondrial precursor [Phytophthora infestans T30-4]	247.09	0.2476	2	4	5	33	311	31.8	5.52	0.774
348665485	hypothetical protein PHYSODRAFT_259740 [Phytophthora sojae]	0	0.0978	1	1	1	1	92	9.6	5.97	0.774
262097561	guanine nucleotide-binding protein subunit beta-2-like protein [Phytophthora infestans T30-4]	1761.88	0.7508	1	1	18	246	317	34.9	6.61	0.775
348671802	hypothetical protein PHYSODRAFT_547605 [Phytophthora sojae]	216.39	0.1006	1	3	4	12	626	68	6.65	0.776
348672162	hypothetical protein PHYSODRAFT_355171 [Phytophthora sojae]	67.61	0.1633	1	1	3	3	245	27.7	8.05	0.776
262096345	DEAD/DEAH box RNA helicase, putative [Phytophthora infestans T30-4]	0	0.0145	2	1	1	2	758	86.4	8.87	0.776
262097810	transcription elongation factor B polypeptide 1 [Phytophthora infestans T30-4]	0	0.1429	2	1	1	2	105	11.7	4.59	0.776
348677468	tyrosine biosynthesis bifunctional enzyme [Phytophthora sojae]	360.46	0.1333	1	5	11	29	1478	163.2	6.52	0.778
262099249	fumarate reductase flavoprotein subunit, putative [Phytophthora infestans T30-4]	84.65	0.1559	2	6	6	9	481	51.3	6.62	0.778
348673540	hypothetical protein PHYSODRAFT_346993 [Phytophthora sojae]	27.94	0.1	1	1	1	1	130	14.8	10.35	0.778
262101211	phosphoacetylglucosamine mutase, putative [Phytophthora infestans T30-4]	296.74	0.1836	1	2	7	24	561	62	5.72	0.78
262109867	conserved hypothetical protein [Phytophthora infestans T30-4]	41.86	0.0839	1	1	3	9	298	34.4	5.62	0.78
262099660	ubiquitin carboxyl-terminal hydrolase, putative [Phytophthora infestans T30-4]	23.98	0.0422	1	1	3	3	805	89.8	5.64	0.78
348684332	hypothetical protein PHYSODRAFT_349849 [Phytophthora sojae]	51.26	0.2075	1	1	6	8	318	36.3	8.53	0.78
262099170	T-complex protein 1 subunit eta [Phytophthora infestans T30-4]	236.88	0.2842	1	12	12	24	577	62.2	6.86	0.781
262099762	eukaryotic translation initiation factor 3 subunit C, putative [Phytophthora infestans T30-4]	282.91	0.1155	1	5	10	27	970	108.5	6.87	0.781
348674189	hypothetical protein PHYSODRAFT_286719 [Phytophthora sojae]	37.16	0.1757	1	2	2	2	148	16.5	4.86	0.781
358246137	triosephosphate isomerase/glyceraldehyde-3-phosphate dehydrogenase, partial [Phytophthora syringae]	482.45	0.2757	2	2	12	56	526	56.1	5.76	0.782
262100051	thioredoxin, putative [Phytophthora infestans T30-4]	90.91	0.3524	1	1	2	6	105	11.8	4.68	0.782
348690569	hypothetical protein PHYSODRAFT_353751 [Phytophthora sojae]	69.53	0.263	1	2	8	12	384	43.9	7.03	0.783
262099876	conserved hypothetical protein [Phytophthora infestans T30-4]	73.39	0.1194	1	2	2	3	201	22.3	10.24	0.783
332985426	heat shock protein 90, partial [Phytophthora capsici]	197.61	0.4387	9	3	7	38	155	17.7	4.69	0.784
262107880	carbohydrate esterase, putative [Phytophthora infestans T30-4]	166.71	0.1751	3	1	5	14	297	30.9	6.55	0.784
348688493	hypothetical protein PHYSODRAFT_353512 [Phytophthora sojae]	119.01	0.2411	3	1	5	11	282	29.5	5.52	0.784
262095282	aspartate carbamoyltransferase [Phytophthora infestans T30-4]	90.18	0.0997	1	1	3	5	321	35.4	7.03	0.784
348686469	hypothetical protein PHYSODRAFT_285181 [Phytophthora sojae]	134.41	0.3833	1	4	4	40	120	13.5	9.77	0.784
348686061	hypothetical protein PHYSODRAFT_482876 [Phytophthora sojae]	51.72	0.0284	2	1	1	1	529	58.8	5.58	0.784
348675531	hypothetical protein PHYSODRAFT_354768 [Phytophthora sojae]	35.09	0.1577	2	3	3	4	222	25.1	6.52	0.784
375267416	malate synthase, partial [Plasmopara viticola]	330.57	0.2669	1	1	5	38	251	27.3	7.78	0.785
348671618	hypothetical protein PHYSODRAFT_435859 [Phytophthora sojae]	233.63	0.4674	2	4	4	11	92	10.7	5.27	0.785
348668207	hypothetical protein PHYSODRAFT_526739 [Phytophthora sojae]	25.29	0.1709	1	2	2	4	158	17.5	6.4	0.785
262109532	phosphoglucomutase [Phytophthora infestans T30-4]	1723.47	0.3299	1	5	27	134	1058	115.5	5.45	0.786
262097359	sterol 3-beta-glucosyltransferase, putative [Phytophthora infestans T30-4]	59.31	0.0243	10	3	3	3	1401	154.6	7.43	0.787
262096515	DnaJ subfamily C member 2 protein [Phytophthora infestans T30-4]	143.86	0.1905	3	5	5	9	420	47.9	8.41	0.787
113223	RecName: Full=Actin-1	2187.13	0.7048	5	10	23	329	376	41.9	5.49	0.788
348672097	elongation factor 3-like protein ABCF transporter family [Phytophthora sojae]	38.34	0.0772	1	1	5	5	1140	125.5	6.34	0.788
348686467	hypothetical protein PHYSODRAFT_285180 [Phytophthora sojae]	120.48	0.1474	1	2	6	11	719	76.2	6.64	0.788
348670626	hypothetical protein PHYSODRAFT_287050 [Phytophthora sojae]	124.36	0.1224	10	2	3	14	433	47.1	5.69	0.789
348677479	hypothetical protein PHYSODRAFT_351153 [Phytophthora sojae]	65.95	0.0692	1	1	3	4	506	56.1	6.52	0.789
348683813	myosin-like protein [Phytophthora sojae]	56.62	0.0327	2	4	4	4	1775	202	9.8	0.789
262095272	oxidoreductase, putative [Phytophthora infestans T30-4]	51.41	0.0853	1	1	1	2	258	27	5.48	0.789
348681403	hypothetical protein PHYSODRAFT_285573 [Phytophthora sojae]	1250.22	0.4859	2	12	12	129	284	30.9	5.4	0.79
348686588	hypothetical protein PHYSODRAFT_359660 [Phytophthora sojae]	164.78	0.1946	1	3	5	23	334	37.4	5.22	0.79
348689068	hypothetical protein PHYSODRAFT_353603 [Phytophthora sojae]	35.73	0.2571	3	5	5	8	175	20.1	8.35	0.79
348681578	hypothetical protein PHYSODRAFT_557468 [Phytophthora sojae]	636.84	0.3924	2	3	6	31	316	33	8.51	0.79
348669583	GTP-binding protein [Phytophthora sojae]	215.86	0.4393	3	9	9	38	214	24.2	7.83	0.791
348684168	hypothetical protein PHYSODRAFT_353901 [Phytophthora sojae]	6437.46	0.6284	1	1	20	415	366	41	6.46	0.792
262111403	ubiquitin activating enzyme, E1 family, putative [Phytophthora infestans T30-4]	55.83	0.0301	2	1	2	2	1063	117.9	5.27	0.792
348674273	hypothetical protein PHYSODRAFT_355047 [Phytophthora sojae]	339.9	0.5833	2	11	11	72	144	16.2	9.96	0.793
348681624	hypothetical protein PHYSODRAFT_542471 [Phytophthora sojae]	1629.12	0.3987	1	1	15	114	464	51.5	6.62	0.793
348684423	hypothetical protein PHYSODRAFT_556845 [Phytophthora sojae]	468.77	0.1864	1	6	14	31	1089	123.7	6.42	0.793
348690321	hypothetical protein PHYSODRAFT_353731 [Phytophthora sojae]	47.05	0.0379	1	1	1	2	449	50.1	9.41	0.793
348667100	hypothetical protein PHYSODRAFT_356091 [Phytophthora sojae]	707.72	0.2629	2	9	9	34	407	44.1	4.97	0.794
348682898	hypothetical protein PHYSODRAFT_495458 [Phytophthora sojae]	60.27	0.0899	2	5	5	6	1001	108.2	6.42	0.794
262101487	conserved hypothetical protein [Phytophthora infestans T30-4]	152.69	0.0094	2	1	1	2	2879	323.1	5.55	0.794
262108862	hypothetical protein PITG_17785 [Phytophthora infestans T30-4]	43.2	0.1982	2	2	2	3	111	13	11.72	0.795
348671428	hypothetical protein PHYSODRAFT_347669 [Phytophthora sojae]	305.34	0.1889	2	2	16	39	1043	117.5	6.38	0.795
348672576	aspartylasparaginylbeta-hydroxylase-like protein [Phytophthora sojae]	41.03	0.0739	1	1	1	1	230	26.6	6.52	0.795
348665275	hypothetical protein PHYSODRAFT_534742 [Phytophthora sojae]	36.73	0.0679	2	2	3	6	633	70.1	5.94	0.796
348671824	hypothetical protein PHYSODRAFT_562723 [Phytophthora sojae]	865.06	0.1138	2	4	5	59	448	46.2	4.72	0.796
262111948	cytochrome P450, putative [Phytophthora infestans T30-4]	60.33	0.04	2	4	4	5	1099	125	7.49	0.797
262097042	40S ribosomal protein S14 [Phytophthora infestans T30-4]	469.17	0.5467	2	2	7	51	150	16.1	10.32	0.798
348667967	hypothetical protein PHYSODRAFT_250104 [Phytophthora sojae]	198.17	0.1919	2	10	10	22	714	80.5	6.74	0.798
348676355	hypothetical protein PHYSODRAFT_507388 [Phytophthora sojae]	920.2	0.5426	203	1	17	93	446	50.1	4.86	0.798
325190981	fatty acid synthase alphasubunit putative [Albugo laibachii Nc14]	38.49	0.0083	1	1	3	4	4115	454	5.95	0.798
262108742	12-oxophytodienoate reductase, putative [Phytophthora infestans T30-4]	77.83	0.1075	2	3	3	7	372	41.1	6.67	0.799
262097548	60S ribosomal protein L19-1 [Phytophthora infestans T30-4]	98.97	0.2703	2	6	6	26	185	21.9	11.49	0.8
114865156	translation elongation factor 1-alpha, partial [Pythium sp. quercum]	5884.65	0.3935	4	1	11	464	310	33.8	8.43	0.8
348683908	hypothetical protein PHYSODRAFT_482921 [Phytophthora sojae]	202.68	0.2012	2	1	8	24	517	57.4	9.07	0.8
348672200	hypothetical protein PHYSODRAFT_265342 [Phytophthora sojae]	0	0.0775	1	1	1	6	129	15.1	8.76	0.8
262101749	conserved hypothetical protein [Phytophthora infestans T30-4]	62.09	0.015	3	1	1	1	866	96.3	5.8	0.8
262108184	splicing factor, arginine/serine-rich, putative [Phytophthora infestans T30-4]	56.5	0.0687	2	2	2	3	233	26.8	12.02	0.801
348671224	hypothetical protein PHYSODRAFT_317994 [Phytophthora sojae]	27.6	0.2248	1	1	3	3	129	14.6	5.4	0.801
262103820	delta-aminolevulinic acid dehydratase, putative [Phytophthora infestans T30-4]	0	0.0765	1	2	2	3	327	36.3	6.64	0.801
218766466	hypothetical protein, partial [Phytophthora cinnamomi]	84.07	0.3191	1	1	2	4	94	10.6	5.02	0.802
348679629	putative aldehyde reductase [Phytophthora sojae]	105.04	0.1877	1	3	3	6	277	30.4	6.04	0.802
262109887	succinate dehydrogenase flavoprotein subunit, mitochondrial precursor [Phytophthora infestans T30-4]	422.95	0.3648	2	3	17	48	625	68.3	5.85	0.803
348690142	hypothetical protein PHYSODRAFT_466781 [Phytophthora sojae]	37.58	0.1963	2	2	2	5	107	12.6	5.99	0.803
325190877	electron transfer flavoprotein subunit alpha putativ [Albugo laibachii Nc14]	79.43	0.136	1	1	2	7	331	35.4	5.95	0.803
348667860	hypothetical protein PHYSODRAFT_288935 [Phytophthora sojae]	195.54	0.1205	3	1	3	23	224	25.2	6.74	0.804
348688710	hypothetical protein PHYSODRAFT_477401 [Phytophthora sojae]	131.48	0.1571	1	4	7	37	350	39.4	6.02	0.804
348667242	hypothetical protein PHYSODRAFT_529995 [Phytophthora sojae]	58.92	0.0134	1	1	1	3	968	108.2	6.9	0.804
262103650	fructose 1,6 bisphosphatase [Phytophthora infestans T30-4]	149.24	0.2823	3	4	7	13	333	36.4	5.55	0.805
348677511	hypothetical protein PHYSODRAFT_331311 [Phytophthora sojae]	29.02	0.1237	2	3	3	6	283	32.1	5.03	0.805
262109935	60S ribosomal protein L3 [Phytophthora infestans T30-4]	1924.53	0.5116	3	19	19	172	389	44.3	10.39	0.806
262108638	eukaryotic translation initiation factor 3 subunit E-interacting protein, putative [Phytophthora infestans T30-4]	293.17	0.2694	2	10	10	26	490	56.2	6.64	0.806
262103107	D-isomer specific 2-hydroxyacid dehydrogenase, putative [Phytophthora infestans T30-4]	1351.37	0.4474	2	2	11	82	333	36.4	6.68	0.808
262111039	conserved hypothetical protein [Phytophthora infestans T30-4]	0	0.013	2	1	1	1	998	110.3	5.4	0.808
348674313	hypothetical protein PHYSODRAFT_352029 [Phytophthora sojae]	38.62	0.0258	1	1	1	1	621	69.5	8.37	0.808
262107769	ribonucleoside-diphosphate reductase small chain [Phytophthora infestans T30-4]	0	0.0818	1	2	2	2	379	43.5	5.12	0.808
348686596	hypothetical protein PHYSODRAFT_345169 [Phytophthora sojae]	370.53	0.3054	9	5	14	53	514	57.8	6.81	0.809
262101128	conserved hypothetical protein [Phytophthora infestans T30-4]	51.66	0.031	1	3	4	7	1324	146.9	7.05	0.809
348679106	hypothetical protein PHYSODRAFT_501150 [Phytophthora sojae]	59.43	0.0904	2	3	3	4	343	36.7	5.99	0.809
262112085	arginine N-methyltransferase, putative [Phytophthora infestans T30-4]	38.09	0.069	1	1	2	2	377	42.9	4.94	0.81
348685659	hypothetical protein PHYSODRAFT_354074 [Phytophthora sojae]	359.68	0.4189	1	9	9	50	148	16.4	10.62	0.812
262105761	conserved hypothetical protein [Phytophthora infestans T30-4]	105.2	0.3451	2	6	6	17	142	15.8	7.3	0.812
348666059	hypothetical protein PHYSODRAFT_362512 [Phytophthora sojae]	39.13	0.0591	1	1	2	3	406	44.4	5.99	0.812
262097298	eukaryotic translation initiation factor 3 subunit F, putative [Phytophthora infestans T30-4]	155.68	0.1685	2	4	4	17	279	30.5	4.78	0.812
262107701	pyruvate dehydrogenase E1 component subunit alpha [Phytophthora infestans T30-4]	437.73	0.1716	2	4	9	55	402	44.4	8.12	0.813
348679816	putative dehydrogenase [Phytophthora sojae]	237.01	0.2936	2	2	10	30	470	51.2	7.52	0.813
262102913	xaa-Pro aminopeptidase, putative [Phytophthora infestans T30-4]	0	0.0249	2	1	1	1	481	53.7	6.65	0.813
262098500	conserved hypothetical protein [Phytophthora infestans T30-4]	115.45	0.092	2	2	2	6	326	34.7	6.34	0.814
262095750	pyruvate kinase, putative [Phytophthora infestans T30-4]	764.43	0.2088	1	5	8	34	522	57.4	7.46	0.815
348690353	DAHP synthetase phospho-2dehydro-3-deoxyheptonate aldolase [Phytophthora sojae]	78.06	0.2537	2	6	6	13	406	44.3	8.1	0.815
348668177	hypothetical protein PHYSODRAFT_288786 [Phytophthora sojae]	42.32	0.1094	1	1	1	1	128	13.9	11.22	0.815
262107877	seryl-tRNA synthetase [Phytophthora infestans T30-4]	205.32	0.3062	1	3	11	30	454	51.8	6.9	0.816
348688709	hypothetical protein PHYSODRAFT_552261 [Phytophthora sojae]	1384.43	0.4613	2	2	13	167	349	39.4	7.44	0.816
262111122	alcohol dehydrogenase class-3, putative [Phytophthora infestans T30-4]	103.79	0.2953	1	3	9	24	386	41.7	6.44	0.817
348676868	hypothetical protein PHYSODRAFT_314387 [Phytophthora sojae]	102.73	0.1864	2	2	7	13	515	55.9	6.42	0.817
348690512	hypothetical protein PHYSODRAFT_553371 [Phytophthora sojae]	63.29	0.1552	2	4	4	8	348	39.2	5.54	0.817
262111014	imidazole glycerol phosphate synthase hisHF, putative [Phytophthora infestans T30-4]	28.35	0.0928	3	4	4	5	582	63.4	6.43	0.817
348679135	hypothetical protein PHYSODRAFT_500480 [Phytophthora sojae]	2825.92	0.4171	2	2	22	180	633	68	5.1	0.818
262101645	ADP-ribosylation factor family [Phytophthora infestans T30-4]	941.85	0.6298	9	9	9	79	181	20.6	6.93	0.818
262108163	50S ribosomal protein L4 [Phytophthora infestans T30-4]	30.91	0.0686	2	2	2	3	277	30.4	9.99	0.818
262096335	proteasome subunit beta type-2, putative [Phytophthora infestans T30-4]	53.73	0.2132	2	4	4	11	197	22.2	6.55	0.818
348673782	hypothetical protein PHYSODRAFT_354997 [Phytophthora sojae]	1220.98	0.474	2	11	11	117	192	22.6	10.48	0.819
348685684	hypothetical protein PHYSODRAFT_486498 [Phytophthora sojae]	32.36	0.0659	1	1	1	3	182	21	8.91	0.819
262102109	eukaryotic translation initiation factor 3, putative [Phytophthora infestans T30-4]	67.61	0.0958	1	1	3	3	449	50.9	8.18	0.819
348672993	hypothetical protein PHYSODRAFT_257200 [Phytophthora sojae]	72.46	0.0335	2	2	2	4	746	79.8	6.33	0.82
262109711	conserved hypothetical protein [Phytophthora infestans T30-4]	84.4	0.1111	2	1	3	6	459	51	8.25	0.821
262098670	ribosomal protein S17, putative [Phytophthora infestans T30-4]	32.06	0.225	1	2	2	2	80	9.4	10.05	0.821
262096141	peroxisomal (S)-2-hydroxy-acid oxidase, putative [Phytophthora infestans T30-4]	201.77	0.322	2	10	10	31	382	41.4	7.37	0.822
348671345	hypothetical protein PHYSODRAFT_518692 [Phytophthora sojae]	93.22	0.1958	2	3	3	4	240	26	4.92	0.822
262107794	cell division protein ftsZ [Phytophthora infestans T30-4]	0	0.0335	2	1	1	1	508	53.7	4.97	0.822
348675004	hypothetical protein PHYSODRAFT_286194 [Phytophthora sojae]	0	0.1765	1	1	1	1	102	11.6	10.93	0.822
262104001	DEAD/DEAH box RNA helicase, putative [Phytophthora infestans T30-4]	212.92	0.1598	2	12	12	20	1095	124.6	7.02	0.823
348666230	putative ATPase [Phytophthora sojae]	2105.68	0.5507	3	33	33	155	808	89.6	5.17	0.823
262103754	conserved hypothetical protein [Phytophthora infestans T30-4]	90.8	0.1151	1	1	3	7	278	31	5.95	0.823
348677384	hypothetical protein PHYSODRAFT_264157 [Phytophthora sojae]	71.17	0.1377	2	5	5	6	559	61.7	6	0.824
262107759	conserved hypothetical protein [Phytophthora infestans T30-4]	31.77	0.0139	1	1	1	1	862	95	5.71	0.824
262098696	pirin, putative [Phytophthora infestans T30-4]	37.61	0.1502	2	3	3	3	293	32.5	5.6	0.824
262097530	conserved hypothetical protein [Phytophthora infestans T30-4]	64.88	0.0844	5	2	2	4	154	17.6	10.71	0.825
348684415	hypothetical protein PHYSODRAFT_284882 [Phytophthora sojae]	1343.11	0.474	1	3	8	78	192	21.5	11.24	0.825
348677506	hypothetical protein PHYSODRAFT_300428 [Phytophthora sojae]	49.73	0.0809	1	2	2	3	235	27.2	5.17	0.825
348677498	glucan 1,3-beta-glucosidase [Phytophthora sojae]	62.46	0.0858	1	1	3	5	373	43.3	6.27	0.825
262102059	conserved hypothetical protein [Phytophthora infestans T30-4]	271.95	0.3308	1	1	3	45	133	15.1	5.33	0.825
348683762	hypothetical protein PHYSODRAFT_484339 [Phytophthora sojae]	158.35	0.0543	1	2	4	5	1104	120.1	5.39	0.825
262110193	ribose-5-phosphate isomerase [Phytophthora infestans T30-4]	44.86	0.125	2	2	2	3	240	25.9	6.25	0.825
262101566	biotin-protein ligase, putative [Phytophthora infestans T30-4]	65.06	0.0854	2	2	2	4	316	34.2	5.52	0.826
262107230	hypothetical protein PITG_16925 [Phytophthora infestans T30-4]	252.61	0.5686	2	2	2	26	51	5.5	4.6	0.826
348669015	hypothetical protein PHYSODRAFT_564720 [Phytophthora sojae]	128.12	0.2411	2	9	9	18	423	46.1	7.53	0.826
262100112	CRM1 C terminal Exportin 1-like protein [Phytophthora infestans T30-4]	376.31	0.1747	1	2	12	32	1076	123.1	5.88	0.826
348673794	hypothetical protein PHYSODRAFT_355000 [Phytophthora sojae]	2439.79	0.7634	1	2	21	279	317	34.9	6.61	0.826
348688746	hypothetical protein PHYSODRAFT_260433 [Phytophthora sojae]	102.53	0.2426	2	7	7	11	404	44	6.42	0.826
262099508	conserved hypothetical protein [Phytophthora infestans T30-4]	69.27	0.1958	1	2	2	6	143	14.8	7.37	0.826
348671624	hypothetical protein PHYSODRAFT_338154 [Phytophthora sojae]	196.59	0.0614	2	1	1	6	293	31.3	5.91	0.826
262101367	conserved hypothetical protein [Phytophthora infestans T30-4]	316.26	0.2945	2	3	3	15	163	17.7	10.43	0.826
348683758	hypothetical protein PHYSODRAFT_370516 [Phytophthora sojae]	0	0.0591	2	1	1	4	203	23.6	6.98	0.826
348686313	hypothetical protein PHYSODRAFT_285152 [Phytophthora sojae]	507.67	0.3934	5	1	11	77	244	27.6	10.43	0.827
348676374	hypothetical protein PHYSODRAFT_250961 [Phytophthora sojae]	548.95	0.2603	2	4	14	79	557	62.3	7.46	0.827
348671155	hypothetical protein PHYSODRAFT_287141 [Phytophthora sojae]	75.35	0.1415	3	8	8	10	763	84.6	5.54	0.827
348672093	hypothetical protein PHYSODRAFT_514860 [Phytophthora sojae]	83.04	0.1988	2	6	6	9	171	19.5	4.54	0.827
262111779	N-terminal acetyltransferase complex ARD1 subunit [Phytophthora infestans T30-4]	28.1	0.086	2	2	2	3	186	21.2	7.49	0.828
348664887	hypothetical protein PHYSODRAFT_320320 [Phytophthora sojae]	68.22	0.0473	1	2	2	4	465	52.1	8.53	0.828
348684050	hypothetical protein PHYSODRAFT_556501 [Phytophthora sojae]	75.04	0.024	1	1	1	1	916	99.3	4.77	0.828
348676799	hypothetical protein PHYSODRAFT_285813 [Phytophthora sojae]	352.82	0.4324	2	5	5	72	111	12.3	9.91	0.829
348688456	hypothetical protein PHYSODRAFT_551993 [Phytophthora sojae]	171.53	0.2641	1	3	8	27	390	43.5	8.02	0.829
262096302	conserved hypothetical protein [Phytophthora infestans T30-4]	40.96	0.2308	1	2	4	10	247	27.8	6.32	0.83
262104418	Mitochondrial Carrier (MC) Family [Phytophthora infestans T30-4]	72.03	0.0802	1	1	4	7	499	54.9	9.16	0.83
348671903	hypothetical protein PHYSODRAFT_336225 [Phytophthora sojae]	34.48	0.0469	9	1	1	2	213	21.5	9.16	0.83
262096130	conserved hypothetical protein [Phytophthora infestans T30-4]	123.3	0.0667	3	1	2	12	465	49.8	7.96	0.83
262111305	DNA polymerase subunit alpha B, putative [Phytophthora infestans T30-4]	32.69	0.0256	2	1	1	1	624	68.8	7.05	0.83
348683324	hypothetical protein PHYSODRAFT_284701 [Phytophthora sojae]	52.73	0.2191	2	3	3	5	178	20.6	5.39	0.831
348672542	metalloprotease family M20/M25/M40 [Phytophthora sojae]	0	0.1014	1	2	4	4	434	47.7	5.08	0.831
262096944	isoleucyl-tRNA synthetase [Phytophthora infestans T30-4]	280.52	0.1582	1	2	16	35	1176	132.6	6.39	0.832
348668487	hypothetical protein PHYSODRAFT_288832 [Phytophthora sojae]	0	0.102	1	1	1	1	147	15.7	5.43	0.832
325186200	unnamed protein product [Albugo laibachii Nc14]	71.63	0.0335	1	1	2	14	477	52.3	6	0.833
348689065	hypothetical protein PHYSODRAFT_537479 [Phytophthora sojae]	0	0.059	1	1	2	2	830	90.7	6.95	1.202
348687736	hypothetical protein PHYSODRAFT_353417 [Phytophthora sojae]	42.77	0.1154	1	2	2	3	312	32.7	5.17	1.202
262106449	protein kinase, putative [Phytophthora infestans T30-4]	119.25	0.1498	2	8	8	12	881	96.7	8.41	1.204
348667394	hypothetical protein PHYSODRAFT_288871 [Phytophthora sojae]	89.9	0.1332	1	3	4	5	488	53.2	6.06	1.204
262112166	conserved hypothetical protein [Phytophthora infestans T30-4]	39.54	0.0403	2	1	1	1	248	28.3	9.54	1.205
262109710	P-3 complex subunit mu, putative [Phytophthora infestans T30-4]	31.25	0.0871	2	2	2	3	425	47.9	6.35	1.206
262101172	neutral alpha-glucosidase, putative [Phytophthora infestans T30-4]	89.36	0.0861	2	6	6	9	1022	115.1	5.36	1.207
262108543	conserved hypothetical protein [Phytophthora infestans T30-4]	32.05	0.1181	2	1	1	1	127	13.8	9.57	1.207
262096549	conserved hypothetical protein [Phytophthora infestans T30-4]	32.66	0.0034	1	1	1	2	2053	227.5	6.35	1.208
262099141	guanylate kinase [Phytophthora infestans T30-4]	67.47	0.2296	1	2	4	9	270	30	5.54	1.208
348681631	hypothetical protein PHYSODRAFT_285612 [Phytophthora sojae]	416.23	0.4201	2	15	16	55	438	48.4	5.49	1.209
348690443	hypothetical protein PHYSODRAFT_469020 [Phytophthora sojae]	149.78	0.207	2	8	8	15	517	57.4	6.67	1.209
348680339	hypothetical protein PHYSODRAFT_496342 [Phytophthora sojae]	32	0.2397	1	1	1	1	146	15.9	9.51	1.209
262103558	glyceraldehyde-3-phosphate dehydrogenase [Phytophthora infestans T30-4]	3992.86	0.6172	2	1	13	366	303	32.3	5.77	1.21
348671282	hypothetical protein PHYSODRAFT_548791 [Phytophthora sojae]	55.84	0.0605	2	3	3	3	628	70.3	6.61	1.21
262102156	eukaryotic peptide chain release factor subunit 1 [Phytophthora infestans T30-4]	223.54	0.1367	1	1	4	13	439	49	5.22	1.21
262099522	phosphoserine aminotransferase, putative [Phytophthora infestans T30-4]	296.64	0.0567	1	1	16	34	3635	404.5	5.94	1.21
348675230	hypothetical protein PHYSODRAFT_506430 [Phytophthora sojae]	48.78	0.0283	1	1	1	2	460	50.7	6.13	1.21
262112501	FKBP-type peptidyl-prolyl cis-trans isomerase, putative [Phytophthora infestans T30-4]	273.35	0.2099	2	5	5	13	324	34.7	6.81	1.21
262108459	6,7-dimethyl-8-ribityllumazine synthase [Phytophthora infestans T30-4]	112.7	0.293	2	4	4	9	215	22.9	7.9	1.211
262102481	conserved hypothetical protein [Phytophthora infestans T30-4]	146.43	0.1283	1	2	2	4	226	24.4	9.07	1.211
348677188	hypothetical protein PHYSODRAFT_285863 [Phytophthora sojae]	144.08	0.231	2	2	5	8	290	32.1	7.52	1.212
348668842	hypothetical protein PHYSODRAFT_355861 [Phytophthora sojae]	32.18	0.0208	1	1	1	1	384	42.8	6.05	1.213
348688442	hypothetical protein PHYSODRAFT_343770 [Phytophthora sojae]	978.32	0.5394	3	10	10	52	241	25.9	6.8	1.213
262099222	leucyl-tRNA synthetase, cytoplasmic, putative [Phytophthora infestans T30-4]	262.73	0.1458	1	4	12	25	1084	122.9	6.62	1.214
262111011	casein kinase, putative [Phytophthora infestans T30-4]	162.72	0.1741	4	6	6	12	402	46.2	9.57	1.214
262098051	ADP-ribosylation factor family [Phytophthora infestans T30-4]	32.63	0.2131	2	3	3	7	183	20.6	5.69	1.214
348689855	hypothetical protein PHYSODRAFT_476181 [Phytophthora sojae]	42.09	0.0172	1	1	1	1	1048	116.7	5.52	1.214
348684009	hypothetical protein PHYSODRAFT_255017 [Phytophthora sojae]	29.85	0.0436	1	1	1	1	436	47.6	5.3	1.215
262107613	60S ribosomal protein L9 [Phytophthora infestans T30-4]	1285.7	0.5556	2	1	11	89	189	21.9	9.64	1.216
262099605	glucan 1,3-beta-glucosidase, putative [Phytophthora infestans T30-4]	169.93	0.2331	2	5	6	10	356	38.5	4.64	1.216
348680492	hypothetical protein PHYSODRAFT_285400 [Phytophthora sojae]	278.16	0.2796	3	4	4	23	211	24.9	5.55	1.216
262099637	mitogen-activated protein kinase, putative [Phytophthora infestans T30-4]	0	0.0224	2	1	1	1	581	64.7	7.78	1.216
348666526	hypothetical protein PHYSODRAFT_566100 [Phytophthora sojae]	96.74	0.1438	2	1	7	14	786	85.6	6.14	1.218
262108154	conserved hypothetical protein [Phytophthora infestans T30-4]	26.2	0.0361	2	1	1	1	332	36.7	4.5	1.218
262107915	octanoyltransferase, putative [Phytophthora infestans T30-4]	0	0.0839	1	1	1	1	286	32.6	7.88	1.219
262112521	glucokinase, putative [Phytophthora infestans T30-4]	298.97	0.1036	2	1	3	16	338	37.2	7.61	1.22
262109947	RAC family serine/threonine-protein kinase [Phytophthora infestans T30-4]	40.99	0.0379	2	3	3	3	924	102.9	7.88	1.22
348684787	hypothetical protein PHYSODRAFT_487865 [Phytophthora sojae]	0	0.0295	3	1	1	2	576	65.5	5.76	1.22
262100024	cytochrome oxidase assembly protein, putative [Phytophthora infestans T30-4]	0	0.0347	1	1	1	2	461	51.1	10.23	1.22
348670788	hypothetical protein PHYSODRAFT_347522 [Phytophthora sojae]	310.71	0.1384	2	1	10	32	1019	113	6.74	1.222
145932376	NADH dehydrogenase subunit 11 [Phytophthora sojae]	385.56	0.2216	1	3	12	43	668	77.8	9.36	1.222
262102233	conserved hypothetical protein [Phytophthora infestans T30-4]	50.93	0.011	2	1	1	2	1095	121.8	8.19	1.222
262095134	transcription elongation factor, putative [Phytophthora infestans T30-4]	36.1	0.0489	1	1	1	1	307	33.9	9.47	1.223
262110479	glutaminyl-tRNA synthetase, putative [Phytophthora infestans T30-4]	91.58	0.1224	1	2	7	15	670	76.3	8.38	1.223
262101812	conserved hypothetical protein [Phytophthora infestans T30-4]	0	0.0408	1	1	1	1	368	41	7.12	1.223
348680233	hypothetical protein PHYSODRAFT_492501 [Phytophthora sojae]	45.58	0.0721	3	3	3	3	444	48.9	6.42	1.225
262108363	DEAD/DEAH box RNA helicase, putative [Phytophthora infestans T30-4]	23.68	0.0129	3	2	2	2	2091	231.4	8.56	1.225
348675827	hypothetical protein PHYSODRAFT_354799 [Phytophthora sojae]	263.27	0.3735	1	1	6	24	249	27.2	7.21	1.228
50261301	NADH dehydrogenase subunit 7 [Saprolegnia ferax]	53.71	0.148	1	1	5	9	392	45	6.99	1.228
262108095	disulfide-isomerase, putative [Phytophthora infestans T30-4]	168.44	0.1216	2	5	5	16	444	48.7	4.89	1.228
262096220	betaine aldehyde dehydrogenase [Phytophthora infestans T30-4]	41.04	0.0916	2	3	3	3	491	53.1	6.67	1.231
348670071	hypothetical protein PHYSODRAFT_258942 [Phytophthora sojae]	75.93	0.1314	4	4	4	9	388	43.5	6.77	1.234
348681473	hypothetical protein PHYSODRAFT_350726 [Phytophthora sojae]	40.98	0.032	4	2	2	3	687	76.6	6.84	1.234
262103140	Argonaute5 (AGO5) [Phytophthora infestans T30-4]	33.91	0.0481	1	2	3	3	831	92.7	9.19	1.234
262098913	proteasome subunit alpha type-6, putative [Phytophthora infestans T30-4]	194.51	0.4256	1	1	8	19	242	27.2	6.02	1.235
262107160	conserved hypothetical protein [Phytophthora infestans T30-4]	0	0.0275	2	2	2	2	801	89.9	5.27	1.235
348685356	hypothetical protein PHYSODRAFT_481811 [Phytophthora sojae]	92.85	0.0824	2	4	4	6	728	81.8	6.87	1.236
348669270	hypothetical protein PHYSODRAFT_564826 [Phytophthora sojae]	56.63	0.0988	1	2	2	6	253	28.6	6.62	1.236
348687397	hypothetical protein PHYSODRAFT_538841 [Phytophthora sojae]	0	0.0114	1	1	1	1	789	84.9	7.8	1.238
262100894	conserved hypothetical protein [Phytophthora infestans T30-4]	53.8	0.0354	2	2	2	3	678	75.8	4.53	1.238
348672464	hypothetical protein PHYSODRAFT_517137 [Phytophthora sojae]	52.58	0.0693	1	1	1	1	303	32.7	7.99	1.238
348676009	hypothetical protein PHYSODRAFT_505357 [Phytophthora sojae]	251.79	0.2784	2	6	6	16	291	30.9	9.83	1.239
262106474	hsp70-like protein [Phytophthora infestans T30-4]	148.73	0.1223	1	2	8	12	883	98	5.15	1.239
348675824	hypothetical protein PHYSODRAFT_510339 [Phytophthora sojae]	65.27	0.0843	1	1	5	7	842	90	6.6	1.24
262097784	ubiquinone/menaquinone biosynthesis methyltransferase ubiE [Phytophthora infestans T30-4]	0	0.1103	2	1	1	1	136	15.8	5.3	1.24
58201963	ribosomal protein L14 [Phytophthora infestans]	110.29	0.1545	6	2	2	7	123	14	10.43	1.241
262111644	splicing factor 3B subunit 1 [Phytophthora infestans T30-4]	162.4	0.0437	3	3	3	6	1235	138.3	6.25	1.241
348686457	hypothetical protein PHYSODRAFT_483267 [Phytophthora sojae]	97.34	0.2817	2	2	2	9	71	8.5	8.5	1.242
348666225	hypothetical protein PHYSODRAFT_289061 [Phytophthora sojae]	90.73	0.3333	1	4	4	16	81	9.3	8.47	1.242
348683967	hypothetical protein PHYSODRAFT_353879 [Phytophthora sojae]	237.99	0.1019	1	1	2	9	314	33.9	7.14	1.243
262095397	nuclear pore complex protein Nup155 [Phytophthora infestans T30-4]	46.83	0.0332	2	5	5	7	1504	165.6	7.08	1.244
348687253	hypothetical protein PHYSODRAFT_553771 [Phytophthora sojae]	0	0.025	1	1	1	1	560	63.2	8.98	1.244
262103945	ARP2/3 complex 20 kDa subunit [Phytophthora infestans T30-4]	53.28	0.2412	2	4	4	9	170	20	7.42	1.244
262098098	acyl-CoA synthetase short-chain family member, putative [Phytophthora infestans T30-4]	67.51	0.0545	1	1	3	4	679	74.8	6.61	1.245
348676826	hypothetical protein PHYSODRAFT_300022 [Phytophthora sojae]	1069.26	0.5306	1	1	24	99	605	66.5	5.72	1.246
348688583	hypothetical protein PHYSODRAFT_473259 [Phytophthora sojae]	521.07	0.4609	5	7	7	70	115	12.6	10.37	1.246
348682513	hypothetical protein PHYSODRAFT_497133 [Phytophthora sojae]	47.53	0.0761	1	1	1	2	184	21.1	5.8	1.246
262109836	coproporphyrinogen III oxidase, mitochondrial precursor [Phytophthora infestans T30-4]	106.68	0.1574	1	1	5	9	343	39.5	6.13	1.247
262111232	Non-selective Cation Channel-2 (NSCC2) Family [Phytophthora infestans T30-4]	58.05	0.1131	1	4	4	6	336	38.9	4.75	1.248
348684435	hypothetical protein PHYSODRAFT_349881 [Phytophthora sojae]	24.23	0.0465	2	2	2	2	387	44	9.39	1.251
262099305	Rab2 family GTPase, putative [Phytophthora infestans T30-4]	133.42	0.419	2	6	6	18	210	23.2	8.43	1.253
348678344	hypothetical protein PHYSODRAFT_332011 [Phytophthora sojae]	0	0.0925	1	2	2	3	335	36.8	8.35	1.253
348672789	hypothetical protein PHYSODRAFT_548252 [Phytophthora sojae]	297.43	0.0752	2	10	10	33	1144	126.8	6.1	1.255
348685020	hypothetical protein PHYSODRAFT_325908 [Phytophthora sojae]	219.77	0.0446	1	5	6	16	1323	147.3	7.21	1.256
348683880	hypothetical protein PHYSODRAFT_353863 [Phytophthora sojae]	171.9	0.1049	3	3	3	13	448	49.1	5.19	1.256
348672494	hypothetical protein PHYSODRAFT_336750 [Phytophthora sojae]	174.79	0.1553	2	1	10	15	921	101	5.12	1.257
262096373	conserved hypothetical protein [Phytophthora infestans T30-4]	41.59	0.0362	1	1	1	1	387	44.1	7.42	1.257
348670887	hypothetical protein PHYSODRAFT_518916 [Phytophthora sojae]	127.7	0.0619	1	1	3	4	679	74.8	6.93	1.258
262112222	conserved hypothetical protein [Phytophthora infestans T30-4]	44.48	0.0326	1	1	1	1	399	42.6	7.97	1.259
348670901	hypothetical protein PHYSODRAFT_520792 [Phytophthora sojae]	117.97	0.0753	2	2	3	8	372	41.4	7.64	1.26
262103431	protein disulfide-isomerase, putative [Phytophthora infestans T30-4]	100.64	0.0524	1	1	1	6	210	22.7	8.28	1.261
348684267	hypothetical protein PHYSODRAFT_284843 [Phytophthora sojae]	239.75	0.3052	1	3	9	19	344	38.1	6.33	1.262
262103099	Argonaute3 (AGO3) [Phytophthora infestans T30-4]	179.01	0.1215	2	10	11	22	1226	133.2	5.86	1.262
262103557	myosin-like protein [Phytophthora infestans T30-4]	0	0.0365	2	1	1	1	438	47.9	8.73	1.262
262107324	conserved hypothetical protein [Phytophthora infestans T30-4]	48.92	0.074	2	2	2	6	527	58.5	8.15	1.263
348683936	hypothetical protein PHYSODRAFT_255139 [Phytophthora sojae]	365.98	0.1577	2	3	10	30	761	86.9	4.53	1.264
348684497	hypothetical protein PHYSODRAFT_556902 [Phytophthora sojae]	58.96	0.0617	2	2	2	3	454	50.2	6.28	1.264
348687873	hypothetical protein PHYSODRAFT_554108 [Phytophthora sojae]	63.46	0.0287	2	2	2	2	1183	134.5	8.12	1.265
262110239	trafficking protein particle complex subunit 2-like protein [Phytophthora infestans T30-4]	0	0.0786	2	1	1	1	140	15.6	5.47	1.267
348667921	hypothetical protein PHYSODRAFT_565596 [Phytophthora sojae]	41.06	0.052	2	2	6	6	1289	145.4	8.54	1.268
262102915	trifunctional enzyme subunit beta, mitochondrial precursor [Phytophthora infestans T30-4]	133.75	0.2831	1	2	7	14	445	47.8	9.06	1.269
262098585	conserved hypothetical protein [Phytophthora infestans T30-4]	129.17	0.2455	1	2	4	18	167	18.7	6.2	1.271
348681450	hypothetical protein PHYSODRAFT_350723 [Phytophthora sojae]	49.25	0.222	2	6	6	8	446	51.2	8.05	1.271
262105826	conserved hypothetical protein [Phytophthora infestans T30-4]	25.33	0.0129	1	1	1	1	619	69.4	6.57	1.272
348680368	ABC transporter lipid exporter ABCA1 family [Phytophthora sojae]	762.29	0.1201	10	7	20	61	1949	213.4	5.2	1.272
348669136	hypothetical protein PHYSODRAFT_525951 [Phytophthora sojae]	61.29	0.1283	2	4	4	5	491	55.3	6.49	1.273
348682079	hypothetical protein PHYSODRAFT_354429 [Phytophthora sojae]	286.45	0.3214	3	9	9	28	420	46	7.02	1.273
348677302	hypothetical protein PHYSODRAFT_354542 [Phytophthora sojae]	26.98	0.2832	1	3	3	6	113	12.3	8.21	1.274
262101375	conserved hypothetical protein [Phytophthora infestans T30-4]	20.56	0.0183	2	1	1	1	547	61.7	6.86	1.274
348688912	hypothetical protein PHYSODRAFT_322360 [Phytophthora sojae]	30.86	0.0148	2	1	1	1	811	93.1	7.11	1.274
262111354	GTPase, putative [Phytophthora infestans T30-4]	116.53	0.1179	2	4	4	5	407	45.8	8.6	1.276
262101165	lectin, putative [Phytophthora infestans T30-4]	61.26	0.0505	1	1	1	2	416	46.8	7.8	1.277
262111493	mitochondrial import receptor subunit TOM70, putative [Phytophthora infestans T30-4]	34	0.0807	2	3	3	4	595	66.8	5.35	1.277
348684860	hypothetical protein PHYSODRAFT_483447 [Phytophthora sojae]	35.3	0.0295	1	1	1	1	474	53.4	6.49	1.278
348684880	hypothetical protein PHYSODRAFT_554783 [Phytophthora sojae]	62.95	0.1412	1	1	4	8	432	48.2	5.41	1.279
348686919	hypothetical protein PHYSODRAFT_320636 [Phytophthora sojae]	0	0.215	1	2	2	3	107	11.9	9.51	1.28
348671222	hypothetical protein PHYSODRAFT_548747 [Phytophthora sojae]	48.06	0.0586	2	1	1	2	290	31.2	5.76	1.28
262105793	kinesin-like protein [Phytophthora infestans T30-4]	0	0.0063	2	1	1	1	1594	175.6	6.61	1.281
348683893	phosphoribosyldiphosphate synthetase [Phytophthora sojae]	133.28	0.2047	3	7	7	12	425	47.1	7.88	1.281
348685637	hypothetical protein PHYSODRAFT_326460 [Phytophthora sojae]	63.53	0.0294	1	1	1	4	408	47	6.39	1.281
262101705	conserved hypothetical protein [Phytophthora infestans T30-4]	0	0.1101	2	1	1	2	109	12.3	8.88	1.282
262111398	transcription elongation factor SPT5, putative [Phytophthora infestans T30-4]	112.36	0.0342	1	1	3	4	1142	124.7	5.77	1.282
262111985	protein phosphatase 2A regulatory B subunit, putative [Phytophthora infestans T30-4]	0	0.0769	1	2	2	5	494	56.7	7.75	1.282
348666766	hypothetical protein PHYSODRAFT_532354 [Phytophthora sojae]	73.81	0.0229	2	2	2	3	1050	117.6	8.32	1.283
348669712	hypothetical protein PHYSODRAFT_385707 [Phytophthora sojae]	22.12	0.0188	2	1	1	3	426	49.5	5.1	1.284
348683798	hypothetical protein PHYSODRAFT_284757 [Phytophthora sojae]	0	0.0387	2	1	1	1	284	31.4	6.04	1.284
348685858	hypothetical protein PHYSODRAFT_354087 [Phytophthora sojae]	124.78	0.4044	2	2	4	13	136	15.4	11.02	1.287
348683003	hypothetical protein PHYSODRAFT_349597 [Phytophthora sojae]	60.53	0.1435	2	4	4	6	425	48.7	7.3	1.287
348688047	hypothetical protein PHYSODRAFT_343670 [Phytophthora sojae]	1081.73	0.2071	1	2	22	67	1410	154.1	5.06	1.288
348681826	hypothetical protein PHYSODRAFT_557588 [Phytophthora sojae]	135.79	0.1991	1	4	8	15	633	70.6	8.06	1.29
262099607	tryptophan synthase, putative [Phytophthora infestans T30-4]	74.94	0.2593	3	4	4	5	270	28.9	6.54	1.29
348674233	ATP synthase gamma subunit [Phytophthora sojae]	2813.59	0.4211	2	7	8	181	304	32.8	5.34	1.291
262109637	urease accessory protein ureG, putative [Phytophthora infestans T30-4]	280.06	0.1446	3	6	6	19	491	54.9	6.42	1.291
348676937	hypothetical protein PHYSODRAFT_559644 [Phytophthora sojae]	0	0.2358	1	3	3	3	123	14.1	10.18	1.292
262104570	conserved hypothetical protein [Phytophthora infestans T30-4]	44.16	0.1149	1	1	1	2	174	19.1	6.2	1.292
262102350	carbohydrate esterase, putative [Phytophthora infestans T30-4]	0	0.0392	2	1	1	2	332	35	6.57	1.293
262105095	calreticulin precursor [Phytophthora infestans T30-4]	661.57	0.148	2	2	6	41	419	47.3	4.59	1.293
262104367	NADH-ubiquinone oxidoreductase, putative [Phytophthora infestans T30-4]	120.75	0.1063	3	3	3	7	480	54	8.65	1.295
262101647	H - or Na -translocating F-type, V-type and A-type ATPase (F-ATPase) Superfamily [Phytophthora infestans T30-4]	191.58	0.6379	1	2	4	10	116	12.6	5.21	1.295
262096188	protein disulfide-isomerase, putative [Phytophthora infestans T30-4]	26.24	0.1012	1	4	4	9	425	46.6	9.16	1.297
348677941	histidine kinase A two component receptor [Phytophthora sojae]	249.88	0.1549	3	7	7	18	4145	461.5	5.01	1.298
262103459	conserved hypothetical protein [Phytophthora infestans T30-4]	37.76	0.0347	4	1	1	1	259	29.3	5.38	1.298
262108512	elongation factor G, putative [Phytophthora infestans T30-4]	39.03	0.024	4	1	1	1	1001	111.6	6.29	1.298
262103268	serine palmitoyltransferase, putative [Phytophthora infestans T30-4]	109.81	0.228	4	6	6	10	443	48.6	8.1	1.299
262102438	conserved hypothetical protein [Phytophthora infestans T30-4]	36.69	0.1321	3	2	2	2	318	33.3	4.49	1.301
262105030	callose synthase, putative [Phytophthora infestans T30-4]	41.96	0.031	5	5	5	7	2228	250.2	6.65	1.301
371769318	actin-related protein 2/3 complex subunit, partial [Phytophthora capsici]	39.97	0.175	13	1	3	9	200	22.3	8.41	1.302
348682389	hypothetical protein PHYSODRAFT_490738 [Phytophthora sojae]	26.57	0.117	1	1	1	2	94	10.4	8.57	1.302
348671217	hypothetical protein PHYSODRAFT_337801 [Phytophthora sojae]	0	0.1897	1	1	1	1	116	12.8	9.26	1.303
348689651	estradiol 17beta-dehydrogenase [Phytophthora sojae]	34.57	0.0641	1	1	2	4	421	46.4	8.81	1.303
262097098	Rab21/Rab5 family GTPase, putative [Phytophthora infestans T30-4]	101.68	0.1547	3	3	3	6	278	30.9	9.17	1.303
262104265	FACT complex subunit SSRP1, putative [Phytophthora infestans T30-4]	220.12	0.1676	2	7	7	14	537	60.4	5.8	1.303
262101397	fatty-acid-CoA ligase, putative [Phytophthora infestans T30-4]	0	0.015	2	1	1	1	1131	122.7	6.8	1.303
324983099	beta-tubulin [Phytophthora katsurae]	965.85	0.6947	201	1	17	93	380	42.5	5.69	1.304
348681866	hypothetical protein PHYSODRAFT_360129 [Phytophthora sojae]	446.2	0.1513	1	5	11	38	1104	122.9	5.24	1.304
348684571	hypothetical protein PHYSODRAFT_486943 [Phytophthora sojae]	72.3	0.1163	1	1	4	11	447	49.1	8.75	1.304
348667627	hypothetical protein PHYSODRAFT_356026 [Phytophthora sojae]	482.55	0.3201	7	5	12	61	453	49.9	5.02	1.306
348673354	hypothetical protein PHYSODRAFT_561933 [Phytophthora sojae]	243.21	0.1932	2	3	3	14	207	23.2	6.76	1.306
262098042	propionyl coenzyme A carboxylase (Pi-PCC1) [Phytophthora infestans T30-4]	133.71	0.1361	1	2	9	16	764	84	6.01	1.307
348677431	hypothetical protein PHYSODRAFT_559946 [Phytophthora sojae]	126.73	0.2317	1	1	6	13	436	46.7	9.06	1.307
348684208	hypothetical protein PHYSODRAFT_541614 [Phytophthora sojae]	71.63	0.0345	3	5	5	5	2321	270.9	8.29	1.307
262103936	conserved hypothetical protein [Phytophthora infestans T30-4]	0	0.0309	2	1	1	1	551	61.6	8.82	1.307
348667612	hypothetical protein PHYSODRAFT_565381 [Phytophthora sojae]	75.14	0.0409	1	1	3	3	1197	132.1	5.74	1.307
348681323	hypothetical protein PHYSODRAFT_542338 [Phytophthora sojae]	33.06	0.0479	1	1	1	1	459	51.4	5.15	1.307
348674395	hypothetical protein PHYSODRAFT_347173 [Phytophthora sojae]	351.25	0.288	3	15	15	47	552	60	7.94	1.308
348688671	putative CBEL-like protein [Phytophthora sojae]	159.55	0.2299	4	4	4	14	261	27.1	7.39	1.309
348686647	hypothetical protein PHYSODRAFT_354158 [Phytophthora sojae]	707.41	0.8238	3	14	14	54	244	26.6	4.98	1.313
348683711	hypothetical protein PHYSODRAFT_353833 [Phytophthora sojae]	40.58	0.0678	2	1	1	1	177	19.7	6.39	1.314
348668888	hypothetical protein PHYSODRAFT_549561 [Phytophthora sojae]	5449.74	0.6648	3	1	19	234	361	40.6	5.38	1.315
348682973	hypothetical protein PHYSODRAFT_478382 [Phytophthora sojae]	58.95	0.0891	2	5	5	7	550	57.8	4.55	1.315
325180764	Cytoplasmic dynein 1 heavy chain 1 putative [Albugo laibachii Nc14]	41.51	0.0041	1	2	3	6	6348	726.6	6.48	1.317
262099253	AP-1 complex subunit gamma-1 [Phytophthora infestans T30-4]	213.53	0.1427	2	9	9	13	848	92	6.29	1.317
262095869	brefeldin A-inhibited guanine nucleotide-exchange protein, putative [Phytophthora infestans T30-4]	96.06	0.036	1	2	5	5	1972	215.3	6.57	1.319
262102161	gephyrin-like protein [Phytophthora infestans T30-4]	71.94	0.0551	2	2	2	3	526	56	7.28	1.32
262098863	conserved hypothetical protein [Phytophthora infestans T30-4]	262.82	0.1509	2	3	9	23	696	76.3	9.57	1.321
348678604	hypothetical protein PHYSODRAFT_332215 [Phytophthora sojae]	27.08	0.0051	2	1	1	1	1961	216.6	6.73	1.321
348685949	hypothetical protein PHYSODRAFT_312079 [Phytophthora sojae]	679.51	0.406	1	2	18	69	537	59.3	7.91	1.322
262099523	COP9 signalosome complex subunit 3, putative [Phytophthora infestans T30-4]	30.93	0.0194	1	1	1	1	463	51.7	6.54	1.323
348675629	hypothetical protein PHYSODRAFT_505321 [Phytophthora sojae]	254.86	0.1922	1	2	6	17	463	52	7.87	1.323
262096670	conserved hypothetical protein [Phytophthora infestans T30-4]	289.17	0.2937	1	3	11	28	463	52.4	8.25	1.323
325181392	proteasome subunit beta type6 putative [Albugo laibachii Nc14]	27.34	0.0556	1	1	1	4	216	23.1	7.83	1.324
262100018	carbonic anhydrase, putative [Phytophthora infestans T30-4]	83.25	0.1908	3	5	5	9	325	37	7.43	1.324
348676189	hypothetical protein PHYSODRAFT_316117 [Phytophthora sojae]	106.37	0.0627	1	1	1	4	303	32.6	5.25	1.324
348681446	hypothetical protein PHYSODRAFT_285582 [Phytophthora sojae]	146.77	0.2119	2	7	7	37	236	25.5	7.09	1.325
348675554	hypothetical protein PHYSODRAFT_315701 [Phytophthora sojae]	24.06	0.1008	2	3	3	4	486	53.5	6.19	1.328
262112594	V-type proton ATPase subunit B, putative [Phytophthora infestans T30-4]	834.5	0.471	1	1	17	76	518	57.8	5.59	1.329
262105963	Ca2 :Cation Antiporter (CaCA) Family [Phytophthora infestans T30-4]	230.44	0.1018	1	2	4	23	707	76.9	4.93	1.329
348671600	hypothetical protein PHYSODRAFT_260821 [Phytophthora sojae]	4231.25	0.3427	4	3	10	357	321	35.4	5.6	1.33
262110699	conserved hypothetical protein [Phytophthora infestans T30-4]	32.91	0.038	1	1	2	3	421	46.8	6.14	1.33
348681293	hypothetical protein PHYSODRAFT_354368 [Phytophthora sojae]	174.51	0.1287	17	2	5	12	303	34	8.92	1.333
348675936	hypothetical protein PHYSODRAFT_286376 [Phytophthora sojae]	3771.2	0.4333	2	5	33	297	660	72.8	4.83	1.335
348679964	hypothetical protein PHYSODRAFT_327965 [Phytophthora sojae]	60.97	0.0727	2	2	2	4	523	51.6	4.84	1.335
348686858	hypothetical protein PHYSODRAFT_537928 [Phytophthora sojae]	398.74	0.4364	3	4	11	58	275	30.5	6.57	1.336
262102525	calcineurin-like phosphoesterase [Phytophthora infestans T30-4]	55.7	0.0682	1	4	4	5	719	80.8	5.35	1.336
262108026	histidinol-phosphate aminotransferase, putative [Phytophthora infestans T30-4]	41.25	0.0598	1	2	2	5	418	46.5	7.4	1.336
262111764	myosin-like protein [Phytophthora infestans T30-4]	58.99	0.0273	2	6	6	9	3298	362	6.29	1.336
348668069	hypothetical protein PHYSODRAFT_565047 [Phytophthora sojae]	64.88	0.0624	1	3	5	9	1251	137.6	6.43	1.336
262100978	nucleotide-binding protein 1 [Phytophthora infestans T30-4]	145.26	0.105	1	1	2	4	343	36.1	5.14	1.337
262102479	Mitochondrial Protein Translocase (MPT) Family [Phytophthora infestans T30-4]	36.43	0.028	2	1	1	1	322	35.6	6.8	1.338
348670956	hypothetical protein PHYSODRAFT_352373 [Phytophthora sojae]	194.01	0.1242	1	1	8	16	773	84.3	5.74	1.338
262098209	RAC family serine/threonine-protein kinase [Phytophthora infestans T30-4]	66.38	0.0411	2	3	3	3	1559	173.3	6.21	1.339
262096550	integrator complex subunit 3, putative [Phytophthora infestans T30-4]	44.88	0.0233	2	1	1	1	987	108.7	7.53	1.34
262095057	acyl-CoA dehydrogenase, putative [Phytophthora infestans T30-4]	41.27	0.0535	2	2	2	4	411	44.8	5.54	1.341
348665006	hypothetical protein PHYSODRAFT_353259 [Phytophthora sojae]	32.87	0.0587	2	2	2	2	545	59.7	5.05	1.341
383282360	dihydroorotase, partial [Phytophthora infestans]	0	0.036	3	1	1	1	333	36.5	6.52	1.342
262097943	long-chain-fatty-acid-CoA ligase [Phytophthora infestans T30-4]	109.84	0.1223	1	4	7	22	646	70.7	6.06	1.342
348684802	hypothetical protein PHYSODRAFT_284947 [Phytophthora sojae]	381.21	0.2549	2	2	2	12	102	11.1	7.74	1.343
348686993	hypothetical protein PHYSODRAFT_353347 [Phytophthora sojae]	92.12	0.3281	2	2	3	4	128	15	4.96	1.343
262111227	augmenter of liver regeneration [Phytophthora infestans T30-4]	59.86	0.0958	2	1	1	1	167	18.9	6.67	1.343
348683355	hypothetical protein PHYSODRAFT_556052 [Phytophthora sojae]	1859.46	0.39	1	4	14	116	500	52.6	7.69	1.344
348688877	hypothetical protein PHYSODRAFT_552380 [Phytophthora sojae]	45.84	0.3305	2	3	3	3	118	13	6.09	1.344
348685616	hypothetical protein PHYSODRAFT_555261 [Phytophthora sojae]	61.02	0.0332	1	2	2	4	753	85	6.28	1.345
262101208	conserved hypothetical protein [Phytophthora infestans T30-4]	52.97	0.0574	2	2	2	3	505	55.7	6.8	1.346
262095474	3-ketoacyl-CoA thiolase, mitochondrial [Phytophthora infestans T30-4]	174.66	0.2771	1	3	8	20	397	41.2	6.93	1.346
262099880	luminal-binding protein 3 precursor [Phytophthora infestans T30-4]	4086.97	0.471	2	2	30	294	656	72.4	4.86	1.347
262107491	conserved hypothetical protein [Phytophthora infestans T30-4]	104.34	0.0234	1	2	2	4	1068	121.2	8.47	1.347
262107579	indigoidine synthase A family protein, putative [Phytophthora infestans T30-4]	388.52	0.1004	2	5	5	13	707	75.4	5.72	1.347
262096375	hydroxyacyl-coenzyme A dehydrogenase, mitochondrial precursor [Phytophthora infestans T30-4]	149.42	0.3071	1	1	7	12	368	39.9	8.56	1.347
262104901	AP-3 complex subunit delta, putative [Phytophthora infestans T30-4]	68.1	0.0644	2	4	4	6	979	108.6	6.54	1.347
262102491	cystathionine beta-synthase [Phytophthora infestans T30-4]	33.21	0.1657	2	1	6	9	513	56.1	6.55	1.348
348688152	hypothetical protein PHYSODRAFT_349018 [Phytophthora sojae]	71.97	0.0742	3	2	2	5	418	46.2	6.27	1.348
348674326	hypothetical protein PHYSODRAFT_286750 [Phytophthora sojae]	177.96	0.1069	2	5	5	9	636	71	4.91	1.349
348686339	phosphatidylinositol 3 and 4-kinase-like protein [Phytophthora sojae]	32.72	0.0164	4	1	1	1	1338	150.8	7.87	1.35
262100914	conserved hypothetical protein [Phytophthora infestans T30-4]	28.1	0.0497	2	1	1	1	161	18.2	4.81	1.352
262109380	Argonaute1 (AGO1) [Phytophthora infestans T30-4]	57.25	0.0183	2	1	1	1	927	103.2	9.72	1.352
262108968	calcium/calmodulin-dependent protein kinase, putative [Phytophthora infestans T30-4]	89.73	0.2234	13	3	8	12	385	43	5.45	1.353
262110827	HECT E3 ubiquitin ligase, putative [Phytophthora infestans T30-4]	30.91	0.027	2	1	1	1	741	85	5.03	1.354
348673809	hypothetical protein PHYSODRAFT_355002 [Phytophthora sojae]	43.92	0.0625	2	1	1	1	320	35.6	8.12	1.355
262101075	serine protease family S15, putative [Phytophthora infestans T30-4]	39.32	0.0663	1	2	3	3	739	83	5.76	1.355
262111521	conserved hypothetical protein [Phytophthora infestans T30-4]	177.5	0.3426	1	1	7	23	251	27.2	6.54	1.356
262105862	cysteine protease family C01A, putative [Phytophthora infestans T30-4]	82.49	0.0662	1	1	3	9	710	79.1	5.85	1.356
262099761	aspartyl protease family A01B, putative [Phytophthora infestans T30-4]	65.37	0.0355	1	1	1	4	535	58.5	6.64	1.356
348687560	hypothetical protein PHYSODRAFT_472086 [Phytophthora sojae]	143.67	0.2517	2	7	7	12	437	48.7	8.46	1.357
262100328	3-phosphoinositide-dependent protein kinase, putative [Phytophthora infestans T30-4]	39.76	0.066	3	3	3	3	485	54.4	6.96	1.357
262109238	conserved hypothetical protein [Phytophthora infestans T30-4]	34.65	0.0146	1	1	1	1	962	108.2	8.81	1.357
348679877	hypothetical protein PHYSODRAFT_558392 [Phytophthora sojae]	61.58	0.1099	1	1	4	8	446	51.4	5.54	1.359
348665061	hypothetical protein PHYSODRAFT_342845 [Phytophthora sojae]	1453.39	0.2289	7	7	12	126	1044	111.2	7.09	1.361
325190996	hypothetical protein Aasi_0730 [Albugo laibachii Nc14]	49.24	0.069	1	1	3	3	638	70.8	6.4	1.361
262103973	ATP-binding Cassette (ABC) Superfamily [Phytophthora infestans T30-4]	145	0.0274	2	2	2	4	1316	145.5	6.43	1.361
348670602	hypothetical protein PHYSODRAFT_317690 [Phytophthora sojae]	45.59	0.0303	1	1	2	5	1057	115.5	6.27	1.361
262101115	voltage-gated potassium channel subunit beta, putative [Phytophthora infestans T30-4]	82.16	0.2085	3	3	5	9	355	39.8	6.27	1.362
262103203	ras-related GTP-binding protein, putative [Phytophthora infestans T30-4]	95.4	0.1338	2	3	3	7	269	31.2	5.72	1.364
262109446	mannosyl-oligosaccharide glucosidase, putative [Phytophthora infestans T30-4]	0	0.0213	1	1	1	1	891	100.6	5.33	1.365
348674570	hypothetical protein PHYSODRAFT_545408 [Phytophthora sojae]	535.47	0.261	1	5	10	33	544	60.7	6.57	1.365
145932350	ATP synthase F0 subunit 1 [Phytophthora sojae]	13776.6	0.5972	9	29	29	628	509	56.1	7.39	1.366
262110911	HECT E3 ubiquitin ligase, putative [Phytophthora infestans T30-4]	27.26	0.0439	2	2	2	3	684	77.5	5.25	1.366
262096669	conserved hypothetical protein [Phytophthora infestans T30-4]	240.24	0.408	3	4	4	19	125	13.4	4.54	1.367
262101532	conserved hypothetical protein [Phytophthora infestans T30-4]	40.02	0.0255	1	1	1	1	549	61.3	5.02	1.367
348669670	hypothetical protein PHYSODRAFT_564149 [Phytophthora sojae]	21.58	0.0148	1	1	1	1	540	60.5	8.68	1.369
348688326	hypothetical protein PHYSODRAFT_343735 [Phytophthora sojae]	44.69	0.0391	1	1	1	2	588	64.6	9.7	1.37
348676775	hypothetical protein PHYSODRAFT_502845 [Phytophthora sojae]	460.03	0.2987	4	1	7	25	308	32.5	8.98	1.371
348688658	hypothetical protein PHYSODRAFT_284276 [Phytophthora sojae]	392.62	0.2727	1	2	10	50	418	45.2	6.04	1.371
262099547	conserved hypothetical protein [Phytophthora infestans T30-4]	34.17	0.0638	2	1	1	1	141	15.7	9.69	1.373
348667373	hypothetical protein PHYSODRAFT_444736 [Phytophthora sojae]	35.56	0.0309	1	1	1	1	453	49.7	6.64	1.373
262107266	transglutaminase elicitor M81D [Phytophthora infestans T30-4]	112.33	0.072	13	2	3	9	528	57.2	5.14	1.374
348685379	hypothetical protein PHYSODRAFT_479256 [Phytophthora sojae]	52.52	0.0082	1	2	2	3	2426	270.9	4.7	1.375
262109372	tripeptidyl-peptidase, putative [Phytophthora infestans T30-4]	55.56	0.0425	1	2	5	10	1364	150.9	6.18	1.375
262107890	callose synthase, putative [Phytophthora infestans T30-4]	115.43	0.0879	5	14	14	21	2026	230.2	8.12	1.376
262095184	pyridoxal phosphate phosphatase, putative [Phytophthora infestans T30-4]	20.87	0.0162	3	1	1	1	678	76.8	6.3	1.376
262101536	delta-1-pyrroline-5-carboxylate synthetase [Phytophthora infestans T30-4]	677.22	0.2193	1	5	15	51	757	80.9	7.18	1.377
262096592	3-mercaptopyruvate sulfurtransferase, putative [Phytophthora infestans T30-4]	46.19	0.0344	1	1	1	6	291	32.4	5.33	1.378
262106584	sodium/potassium-transporting ATPase subunit alpha, putative [Phytophthora infestans T30-4]	61.52	0.0335	3	2	2	2	1343	147.5	5.52	1.378
262110423	enoyl-CoA hydratase/isomerase family, putative [Phytophthora infestans T30-4]	24.03	0.0402	1	2	2	3	373	40.3	6.09	1.38
348669020	hypothetical protein PHYSODRAFT_318737 [Phytophthora sojae]	29.04	0.0365	3	1	1	1	384	43	8.76	1.38
348674178	TonB-dependent receptor protein [Phytophthora sojae]	234.86	0.0562	1	1	1	7	267	29.6	4.92	1.381
262099442	myosin-like protein [Phytophthora infestans T30-4]	41.29	0.0087	1	1	1	1	1378	155.9	7.15	1.381
262097299	conserved hypothetical protein [Phytophthora infestans T30-4]	68.82	0.0565	2	1	1	2	283	31.9	5.67	1.381
348673536	hypothetical protein PHYSODRAFT_354973 [Phytophthora sojae]	327.21	0.383	3	3	10	61	282	30.4	9.44	1.382
262107636	pro-apoptotic serine protease, putative [Phytophthora infestans T30-4]	122.32	0.1118	3	6	6	7	966	106.3	6.24	1.384
262099185	26S proteasome non-ATPase regulatory subunit 7 [Phytophthora infestans T30-4]	97.58	0.2132	1	1	6	12	319	36.3	6.7	1.384
348684712	ACY1-like metalloprotease [Phytophthora sojae]	48.33	0.0742	4	2	2	3	418	46.7	6.25	1.384
262096332	pre-mRNA-splicing factor RSE1 [Phytophthora infestans T30-4]	83.19	0.0568	1	3	5	5	1197	132.1	5.74	1.385
262097322	conserved hypothetical protein [Phytophthora infestans T30-4]	17.04	0.0662	2	2	2	2	272	29.9	9.23	1.385
262105096	dihydrolipoyl dehydrogenase 1, mitochondrial precursor [Phytophthora infestans T30-4]	2801.4	0.3992	3	6	16	154	496	52.2	7.71	1.385
262099013	mRNA turnover protein 4 [Phytophthora infestans T30-4]	32.85	0.1197	2	1	1	1	234	26.5	8.06	1.386
262104017	glycerophosphoryl diester phosphodiesterase, putative [Phytophthora infestans T30-4]	30.16	0.0867	1	1	3	5	415	45.5	4.75	1.387
348689668	hypothetical protein PHYSODRAFT_349344 [Phytophthora sojae]	27.63	0.0234	1	1	1	2	385	43.5	8.13	1.388
348683629	cellulase-1, endo-1,4-beta-glucanase [Phytophthora sojae]	42.84	0.0443	2	2	2	3	542	58.7	4.89	1.389
348666068	hypothetical protein PHYSODRAFT_307593 [Phytophthora sojae]	64.28	0.0404	1	1	1	1	322	34.6	7.15	1.389
262095541	protein kinase, putative [Phytophthora infestans T30-4]	181.87	0.1326	2	4	4	14	377	42	6.39	1.39
262097450	DNA-directed RNA polymerase III subunit RPC5-like protein [Phytophthora infestans T30-4]	57.24	0.0204	1	1	1	5	393	44.8	5.35	1.39
262097875	conserved hypothetical protein [Phytophthora infestans T30-4]	0	0.1171	1	1	1	1	111	12.4	8.97	1.39
348674965	hypothetical protein PHYSODRAFT_315528 [Phytophthora sojae]	60.97	0.0669	2	1	1	1	269	29.2	5.29	1.392
348678388	ABC transporter ABCA1 lipid exporter family [Phytophthora sojae]	179.1	0.043	2	2	7	16	1929	211.9	5.38	1.393
262110933	actin-like protein [Phytophthora infestans T30-4]	51.77	0.1196	1	1	3	4	418	47.3	6.54	1.395
348673424	hypothetical protein PHYSODRAFT_335022 [Phytophthora sojae]	43.1	0.0439	2	1	1	1	524	59.2	6.37	1.395
262106970	short-chain specific acyl-CoA dehydrogenase, mitochondrial precursor [Phytophthora infestans T30-4]	131.4	0.2809	2	7	7	17	413	44.3	7.5	1.396
136298	RecName: Full=Tryptophan biosynthesis protein TRP1; Includes: RecName: Full=Indole-3-glycerol phosphate synthase; Short=IGPS; Includes: RecName: Full=N-(5'-phospho-ribosyl)anthranilate isomerase; Short=PRAI	46.68	0.0697	1	2	3	4	531	57.3	5.29	1.397
348680658	hypothetical protein PHYSODRAFT_313130 [Phytophthora sojae]	44.63	0.0457	1	1	1	2	350	39.1	6.35	1.397
348682503	Neprilysin CD10, peptidase [Phytophthora sojae]	188.73	0.0305	2	3	3	7	1245	139.8	5.3	1.398
348670008	hypothetical protein PHYSODRAFT_347790 [Phytophthora sojae]	231.61	0.1019	1	3	7	17	1079	123.6	8.98	1.398
262097497	conserved hypothetical protein [Phytophthora infestans T30-4]	0	0.0508	2	1	1	1	236	27.5	7.96	1.398
262111813	hypothetical protein PITG_06381 [Phytophthora infestans T30-4]	51.51	0.2391	1	1	1	1	92	10.3	9.8	1.398
348667633	hypothetical protein PHYSODRAFT_348222 [Phytophthora sojae]	37.2	0.0324	1	1	2	2	1018	113.5	6.47	1.398
348671863	hypothetical protein PHYSODRAFT_361407 [Phytophthora sojae]	263.61	0.27	1	1	9	25	426	48.1	7.97	1.4
348686513	hypothetical protein PHYSODRAFT_327246 [Phytophthora sojae]	15.44	0.0623	2	3	3	4	706	82.5	5.77	1.401
262098759	atlastin-like protein [Phytophthora infestans T30-4]	108.85	0.1378	2	1	4	11	392	45.2	5.15	1.402
262112003	H - or Na -translocating F-type, V-type and A-type ATPase (F-ATPase) Superfamily [Phytophthora infestans T30-4]	71.6	0.1923	3	4	4	7	260	28.9	9.25	1.403
348684430	hypothetical protein PHYSODRAFT_541826 [Phytophthora sojae]	213.51	0.1322	4	4	9	20	1059	117.9	5.77	1.404
262112105	pyridine nucleotide-disulphide oxidoreductase, putative [Phytophthora infestans T30-4]	32.43	0.1611	1	2	6	8	416	45.4	5.97	1.406
262095450	sideroflexin-1-like protein [Phytophthora infestans T30-4]	166.46	0.1046	2	1	2	8	325	35.7	8.88	1.406
262111703	conserved hypothetical protein [Phytophthora infestans T30-4]	86.01	0.212	2	5	5	7	250	26.4	9.88	1.408
262097344	translation elongation factor 1-alpha, putative [Phytophthora infestans T30-4]	34.48	0.0182	2	1	1	1	660	72.3	7.33	1.408
348681092	hypothetical protein PHYSODRAFT_259403 [Phytophthora sojae]	59.84	0.0246	2	2	2	5	1137	125.1	5.01	1.408
348682867	hypothetical protein PHYSODRAFT_285766 [Phytophthora sojae]	139.25	0.2667	2	5	5	11	315	34.8	6.7	1.409
262099368	conserved hypothetical protein [Phytophthora infestans T30-4]	45.52	0.038	2	1	1	1	316	35.9	4.73	1.41
262100453	voltage-dependent anion-selective channel protein, putative [Phytophthora infestans T30-4]	360.89	0.3156	5	7	10	64	282	29.9	9.04	1.411
262107807	lectin, putative [Phytophthora infestans T30-4]	43.25	0.1542	2	4	4	8	415	46.6	6.28	1.415
262107758	GTP-binding protein TypA/BipA, putative [Phytophthora infestans T30-4]	74.47	0.0856	2	2	4	6	631	69.9	5.53	1.416
262102231	conserved hypothetical protein [Phytophthora infestans T30-4]	37.27	0.0365	1	1	1	1	466	52.4	6.1	1.416
348690312	hypothetical protein PHYSODRAFT_258410 [Phytophthora sojae]	48.62	0.0573	1	1	2	2	419	46.4	6.04	1.416
262103128	glycoside hydrolase, putative [Phytophthora infestans T30-4]	0	0.0274	2	1	1	1	585	65.6	6.77	1.417
348665722	hypothetical protein PHYSODRAFT_438103 [Phytophthora sojae]	0	0.0672	1	1	1	1	238	25.3	4.64	1.417
348684210	hypothetical protein PHYSODRAFT_353904 [Phytophthora sojae]	208.41	0.1436	1	4	5	26	362	39.5	5.07	1.418
262104201	conserved hypothetical protein [Phytophthora infestans T30-4]	132.31	0.0435	1	2	8	13	2849	314.3	6	1.418
262106245	conserved hypothetical protein [Phytophthora infestans T30-4]	37.42	0.0215	1	1	1	1	697	77.1	6.27	1.419
262095021	conserved hypothetical protein [Phytophthora infestans T30-4]	59.9	0.0687	1	1	1	4	233	24.9	4.88	1.42
262100694	conserved hypothetical protein [Phytophthora infestans T30-4]	108.84	0.3925	2	2	2	7	107	11.9	9.63	1.421
348673922	hypothetical protein PHYSODRAFT_347055 [Phytophthora sojae]	55.15	0.0257	1	1	1	1	934	101.1	5.35	1.421
348665186	hypothetical protein PHYSODRAFT_356216 [Phytophthora sojae]	869.72	0.2222	2	4	4	57	270	29.5	5.86	1.422
348688356	hypothetical protein PHYSODRAFT_353485 [Phytophthora sojae]	89.9	0.1055	1	1	2	3	275	29.6	9.54	1.423
262105919	3-ketodihydrosphingosine reductase, putative [Phytophthora infestans T30-4]	69.64	0.1369	2	3	3	5	336	36.2	8.57	1.423
348667626	family 30 glycoside hydrolase [Phytophthora sojae]	178.27	0.1933	1	7	9	19	683	76.8	5.03	1.424
348667546	hypothetical protein PHYSODRAFT_528296 [Phytophthora sojae]	183.51	0.0211	2	2	4	5	2462	275.6	6.47	1.425
348673585	hypothetical protein PHYSODRAFT_286610 [Phytophthora sojae]	244.98	0.4783	2	6	6	27	115	13.2	7.99	1.425
262099554	phosphoserine phosphatase [Phytophthora infestans T30-4]	0	0.1146	1	1	1	1	253	27.7	5.52	1.426
348688785	hypothetical protein PHYSODRAFT_248120 [Phytophthora sojae]	193.92	0.2495	1	3	11	39	473	51.2	5.59	1.427
262108679	AP-1 complex subunit beta, putative [Phytophthora infestans T30-4]	109.52	0.143	1	1	6	13	839	93.2	4.94	1.429
262104403	thioredoxin-like protein [Phytophthora infestans T30-4]	89.71	0.0216	1	1	1	2	603	67.7	7.12	1.43
348669517	hypothetical protein PHYSODRAFT_362097 [Phytophthora sojae]	221.13	0.1594	2	2	15	26	1430	160.9	8.48	1.431
348676356	hypothetical protein PHYSODRAFT_509459 [Phytophthora sojae]	0	0.0901	1	2	2	2	322	34	4.48	1.432
348669373	hypothetical protein PHYSODRAFT_564907 [Phytophthora sojae]	202.86	0.1323	2	1	4	13	393	44.7	6.24	1.433
348688726	hypothetical protein PHYSODRAFT_260508 [Phytophthora sojae]	39.25	0.0532	2	2	2	2	376	43.3	8.9	1.433
262109651	signal peptidase complex catalytic subunit SEC11A, putative [Phytophthora infestans T30-4]	30.07	0.1222	2	1	1	2	180	20.4	5.91	1.434
262106633	conserved hypothetical protein [Phytophthora infestans T30-4]	0	0.0161	2	1	1	2	621	68	6.92	1.436
348669404	hypothetical protein PHYSODRAFT_524714 [Phytophthora sojae]	39.15	0.175	1	1	1	1	120	12.5	10.01	1.436
334701570	NADH dehydrogenase subunit 7 [Phytophthora mirabilis]	199.75	0.3469	4	1	10	28	392	45.1	6.95	1.437
348679889	hypothetical protein PHYSODRAFT_543375 [Phytophthora sojae]	85.14	0.0342	1	2	2	5	644	70.9	7.88	1.438
329763767	beta-tubulin, partial [Pseudoperonospora cubensis]	546.18	0.5887	3	1	9	57	231	25.6	6.04	1.439
348676996	hypothetical protein PHYSODRAFT_502439 [Phytophthora sojae]	939.9	0.495	1	1	17	87	503	56.2	5.8	1.44
348684106	hypothetical protein PHYSODRAFT_349796 [Phytophthora sojae]	87.08	0.0893	2	1	3	6	459	50.9	7.28	1.441
348688717	hypothetical protein PHYSODRAFT_552275 [Phytophthora sojae]	47.56	0.0443	3	2	4	5	1514	172.9	6.39	1.441
348681077	hypothetical protein PHYSODRAFT_490214 [Phytophthora sojae]	28.23	0.0239	1	1	1	1	251	27.1	5.05	1.443
262105885	conserved hypothetical protein [Phytophthora infestans T30-4]	35.35	0.144	2	1	1	3	125	13.8	5.14	1.443
348688366	hypothetical protein PHYSODRAFT_353487 [Phytophthora sojae]	44.52	0.135	1	2	3	4	311	34.1	6.47	1.448
348666909	hypothetical protein PHYSODRAFT_565717 [Phytophthora sojae]	78.98	0.0488	1	1	1	4	430	45.9	9.95	1.448
262096964	vesicle-fusing ATPase, putative [Phytophthora infestans T30-4]	203.9	0.0954	1	1	6	11	765	84	5.92	1.449
348690702	hypothetical protein PHYSODRAFT_349537 [Phytophthora sojae]	160.77	0.17	1	2	9	19	600	68.4	6.1	1.451
348683946	hypothetical protein PHYSODRAFT_556433 [Phytophthora sojae]	0	0.0229	2	2	2	2	612	68.7	8.65	1.451
262096099	transmembrane protein, putative [Phytophthora infestans T30-4]	0	0.032	1	1	1	1	500	55.5	5.01	1.451
348677565	hypothetical protein PHYSODRAFT_545018 [Phytophthora sojae]	268.45	0.2067	2	2	16	30	1229	137.9	7.18	1.453
262097763	glucan 1,3-beta-glucosidase, putative [Phytophthora infestans T30-4]	701.75	0.1628	2	3	7	47	694	77.5	6.61	1.457
348689990	hypothetical protein PHYSODRAFT_344101 [Phytophthora sojae]	235.77	0.2834	8	7	7	20	374	40.5	5.82	1.457
262098153	conserved hypothetical protein [Phytophthora infestans T30-4]	119.52	0.149	1	2	5	10	557	61	6.43	1.458
262111869	myosin-like protein [Phytophthora infestans T30-4]	177.72	0.0686	1	1	5	12	1079	123.9	9.07	1.459
348674087	hypothetical protein PHYSODRAFT_335612 [Phytophthora sojae]	68.33	0.1227	1	1	1	1	163	17.8	4.46	1.459
262101733	conserved hypothetical protein [Phytophthora infestans T30-4]	99.36	0.0216	2	1	1	3	740	83.9	5.96	1.46
262104917	choline-phosphate cytidylyltransferase B [Phytophthora infestans T30-4]	71.5	0.1897	1	4	4	6	311	35.9	6.4	1.461
348686233	hypothetical protein PHYSODRAFT_481772 [Phytophthora sojae]	190.26	0.0422	1	2	5	9	1494	168.2	5.39	1.463
262095477	UDP-glucose:glycoprotein glucosyltransferase, putative [Phytophthora infestans T30-4]	83.48	0.0306	1	2	5	7	1632	183.6	5.33	1.464
348671895	glutathione peroxidase [Phytophthora sojae]	32.73	0.0636	2	1	1	1	283	31.1	8.37	1.466
262096475	conserved hypothetical protein [Phytophthora infestans T30-4]	70.68	0.064	2	1	2	2	469	51.9	6.19	1.47
262099552	conserved hypothetical protein [Phytophthora infestans T30-4]	46.97	0.0243	1	1	1	1	371	42.2	9.36	1.471
262105063	protein phosphatase 2C, putative [Phytophthora infestans T30-4]	39.05	0.0329	2	1	1	1	395	42.5	5.03	1.471
262100676	ubiquitin fusion degradation protein, putative [Phytophthora infestans T30-4]	31.97	0.0226	2	1	1	1	840	93.2	6.23	1.471
262105598	propionyl-CoA carboxylase beta chain, mitochondrial precursor [Phytophthora infestans T30-4]	63.44	0.1682	1	2	6	10	529	58.2	6.06	1.472
262098793	Mitochondrial Protein Translocase (MPT) Family [Phytophthora infestans T30-4]	59.07	0.1221	2	1	1	1	131	14	5.17	1.472
348675725	hypothetical protein PHYSODRAFT_346620 [Phytophthora sojae]	1268.52	0.2303	3	2	15	80	964	105.7	5.57	1.474
262095196	peptidase, putative [Phytophthora infestans T30-4]	75.73	0.025	1	1	1	2	641	70.8	5.52	1.474
262108270	histone H2A type 1 [Phytophthora infestans T30-4]	1479.31	0.5357	4	1	6	82	140	14.8	10.45	1.477
348669654	hypothetical protein PHYSODRAFT_523689 [Phytophthora sojae]	415.85	0.3293	2	10	10	49	495	54.5	8.02	1.478
348689344	hypothetical protein PHYSODRAFT_358640 [Phytophthora sojae]	89.14	0.0775	2	1	2	9	271	29.3	8.16	1.478
348684786	hypothetical protein PHYSODRAFT_284942 [Phytophthora sojae]	567.66	0.224	1	3	5	46	308	34	5.4	1.479
348684211	hypothetical protein PHYSODRAFT_478431 [Phytophthora sojae]	81.91	0.0164	1	1	1	2	1162	129.2	8.02	1.48
262105093	mannitol dehydrogenase, putative [Phytophthora infestans T30-4]	0	0.169	3	4	4	6	355	37.9	6.19	1.481
348668956	hypothetical protein PHYSODRAFT_352694 [Phytophthora sojae]	0	0.1011	1	1	1	2	89	10	9.99	1.483
262108197	myosin-like protein [Phytophthora infestans T30-4]	45.38	0.054	2	5	5	7	1277	144.3	9.1	1.486
348686580	hypothetical protein PHYSODRAFT_555969 [Phytophthora sojae]	270.18	0.1374	1	1	11	22	757	80.8	7.08	1.486
262101111	ribosome biogenesis ATPase RIX7 [Phytophthora infestans T30-4]	78.41	0.0389	3	1	2	4	771	83.3	6.62	1.487
348677762	hypothetical protein PHYSODRAFT_285951 [Phytophthora sojae]	30.78	0.0462	2	1	1	2	173	19.3	4.48	1.487
348676325	hypothetical protein PHYSODRAFT_560655 [Phytophthora sojae]	592.06	0.3333	3	15	15	44	708	78.4	5.39	1.489
262110730	ATP-dependent RNA helicase, putative [Phytophthora infestans T30-4]	41.81	0.1268	4	1	5	6	489	54.6	9.06	1.49
262097960	nucleoside diphosphate kinase B [Phytophthora infestans T30-4]	897.77	0.2715	2	1	5	56	221	23.3	9.63	1.491
348685552	hypothetical protein PHYSODRAFT_540164 [Phytophthora sojae]	675.5	0.3977	1	6	18	74	616	68.1	8.15	1.495
262098462	choline/Carnitine O-acyltransferase, putative [Phytophthora infestans T30-4]	71.54	0.0979	1	1	5	10	633	71.2	7.75	1.497
262110908	protein kinase, putative [Phytophthora infestans T30-4]	42.89	0.0529	2	3	3	4	699	75.3	4.77	1.497
262104283	vesicle-associated membrane protein, putative [Phytophthora infestans T30-4]	25.16	0.1704	1	3	3	3	223	25.8	7.87	1.498
348677303	hypothetical protein PHYSODRAFT_501251 [Phytophthora sojae]	0	0.0242	2	1	1	1	537	60.2	6.34	1.498
262108642	zinc finger CDGSH domain-containing protein 1 [Phytophthora infestans T30-4]	70.91	0.2164	2	2	2	10	134	15.2	9.64	1.5
262096348	conserved hypothetical protein [Phytophthora infestans T30-4]	158.28	0.0215	2	2	4	7	2462	275.4	6.43	1.501
262096576	ATP-binding Cassette (ABC) Superfamily [Phytophthora infestans T30-4]	0	0.0768	2	3	3	5	664	75.4	8.73	1.501
348689700	hypothetical protein PHYSODRAFT_294643 [Phytophthora sojae]	38.74	0.1239	2	6	6	13	549	61.1	4.91	1.502
262112410	AP-2 complex subunit beta, putative [Phytophthora infestans T30-4]	174.79	0.1696	2	1	10	15	896	99	5.12	1.503
348680538	hypothetical protein PHYSODRAFT_298516 [Phytophthora sojae]	74.98	0.0118	2	2	2	3	2203	241.5	5.16	1.504
145932440	NADH dehydrogenase subunit 7 [Phytophthora ramorum]	261.24	0.3444	2	1	10	28	392	45	6.95	1.505
262098869	conserved hypothetical protein [Phytophthora infestans T30-4]	41.45	0.0455	2	5	5	6	988	108.4	6.23	1.505
262099103	thioredoxin-like protein [Phytophthora infestans T30-4]	262.39	0.1823	1	4	5	29	362	39.7	5.17	1.505
262112073	trifunctional enzyme subunit alpha, putative [Phytophthora infestans T30-4]	259.62	0.1926	2	7	11	27	727	77.7	9.13	1.508
348667280	hypothetical protein PHYSODRAFT_319656 [Phytophthora sojae]	17.17	0.0879	1	4	4	5	398	43.8	7.83	1.512
348686830	hypothetical protein PHYSODRAFT_343429 [Phytophthora sojae]	121.69	0.2763	2	5	5	12	304	33.9	8.76	1.515
348681680	hypothetical protein PHYSODRAFT_488160 [Phytophthora sojae]	160.22	0.1069	2	2	2	6	290	31.3	9.35	1.516
262111212	ubiquitin-activating enzyme (E1), putative [Phytophthora infestans T30-4]	67	0.0433	2	1	1	1	624	68.9	5.3	1.516
262107984	anoctamin-like protein [Phytophthora infestans T30-4]	72	0.0575	2	4	4	7	765	87.4	6.47	1.518
262099855	fat-free family protein [Phytophthora infestans T30-4]	54.69	0.0183	1	1	1	1	820	93.1	5.91	1.519
348683824	hypothetical protein PHYSODRAFT_482943 [Phytophthora sojae]	90.47	0.1108	4	2	3	4	370	40.5	7.85	1.52
348686786	ABCA1 lipid exporter [Phytophthora sojae]	244.64	0.0384	4	1	5	18	1978	217.7	5.35	1.52
348675783	hypothetical protein PHYSODRAFT_333832 [Phytophthora sojae]	64.05	0.2359	2	5	5	10	195	22.2	8.69	1.521
348670905	hypothetical protein PHYSODRAFT_563616 [Phytophthora sojae]	0	0.0283	1	1	1	1	530	57.9	6.16	1.521
348670330	ATP synthase beta subunit [Phytophthora sojae]	9832.76	0.7309	2	3	24	733	498	53.2	5.07	1.524
348677485	hypothetical protein PHYSODRAFT_455513 [Phytophthora sojae]	35.94	0.292	2	3	3	4	137	15	7.36	1.525
348664893	putative exo-1,3-beta-glucanase [Phytophthora sojae]	169.26	0.1652	2	5	7	20	684	76.5	5.86	1.528
262105736	peroxisomal trans-2-enoyl-CoA reductase, putative [Phytophthora infestans T30-4]	58.33	0.0342	2	1	1	3	292	31.3	7.58	1.529
262099973	dolichyl-diphosphooligosaccharide-protein glycosyltransferase subunit STT3A, putative [Phytophthora infestans T30-4]	357.3	0.1541	4	8	8	23	850	94.2	7.27	1.532
348687128	hypothetical protein PHYSODRAFT_553697 [Phytophthora sojae]	169.9	0.1926	2	3	4	10	270	30.4	6	1.535
348668835	hypothetical protein PHYSODRAFT_318641 [Phytophthora sojae]	34.19	0.0139	3	1	1	1	1371	152.8	6.62	1.537
262103279	metalloprotease family M01, putative [Phytophthora infestans T30-4]	174.67	0.131	2	2	10	25	1008	113.3	6.06	1.538
262103018	conserved hypothetical protein [Phytophthora infestans T30-4]	39.11	0.0855	2	2	2	2	386	42.4	9.51	1.54
262101084	peptidyl-prolyl cis-trans isomerase CYP19-4 precursor [Phytophthora infestans T30-4]	84.97	0.2573	2	3	3	14	206	22.2	7.44	1.543
262103194	protein phosphatase PP2A regulatory subunit B [Phytophthora infestans T30-4]	34.3	0.029	2	1	1	1	483	54.1	5.81	1.544
348672167	hypothetical protein PHYSODRAFT_303807 [Phytophthora sojae]	58.77	0.0352	1	1	1	2	512	56.9	8.22	1.546
348687518	hypothetical protein PHYSODRAFT_343568 [Phytophthora sojae]	74.29	0.1638	1	1	3	5	348	37.1	8.15	1.547
348675967	hypothetical protein PHYSODRAFT_346687 [Phytophthora sojae]	64.01	0.035	1	1	1	4	457	49.9	7.24	1.547
262104280	conserved hypothetical protein [Phytophthora infestans T30-4]	25.48	0.1148	3	2	2	2	122	13.7	5.82	1.549
262100141	prohibitin [Phytophthora infestans T30-4]	378.11	0.3527	2	1	8	54	275	30.6	6.57	1.55
262107971	COP9 signalosome complex subunit 5, putative [Phytophthora infestans T30-4]	80.72	0.1823	3	3	3	5	362	40.7	5.52	1.552
262104826	hypothetical protein PITG_15311 [Phytophthora infestans T30-4]	0	0.041	1	1	1	2	366	41.3	9.38	1.553
323361185	beta-tubulin [Phytophthora sp. 3 EEO-2011]	685.19	0.5714	86	1	14	64	315	35.3	5.69	1.554
348689347	hypothetical protein PHYSODRAFT_294442 [Phytophthora sojae]	32.79	0.0158	1	1	1	1	379	42.4	5.62	1.555
262108178	Mitochondrial Protein Translocase (MPT) Family [Phytophthora infestans T30-4]	0	0.2824	2	2	2	2	85	10.3	6.29	1.555
348677347	hypothetical protein PHYSODRAFT_300330 [Phytophthora sojae]	0	0.0588	2	1	1	1	255	27.9	5.08	1.557
262101563	conserved hypothetical protein [Phytophthora infestans T30-4]	36.25	0.0354	1	1	1	1	537	58.5	7.91	1.558
348688405	hypothetical protein PHYSODRAFT_551943 [Phytophthora sojae]	68.35	0.107	2	5	5	12	645	73.2	5.12	1.56
262099557	vacuolar-sorting receptor, putative [Phytophthora infestans T30-4]	36.49	0.1484	2	4	4	4	546	60.2	5.15	1.56
348671361	hypothetical protein PHYSODRAFT_355340 [Phytophthora sojae]	27.98	0.0278	1	1	1	4	360	40.5	9.41	1.56
348666817	hypothetical protein PHYSODRAFT_252046 [Phytophthora sojae]	41.02	0.0704	1	1	1	5	213	23.3	5.1	1.56
262109962	alkaline phosphatase, putative [Phytophthora infestans T30-4]	116.93	0.1	1	3	3	4	510	56	4.96	1.562
262105498	phosphoethanolamine N-methyltransferase, putative [Phytophthora infestans T30-4]	111.72	0.1808	5	8	8	18	531	59.6	5.49	1.565
348688918	hypothetical protein PHYSODRAFT_552435 [Phytophthora sojae]	33.67	0.0342	1	1	1	2	322	36.8	6.05	1.567
348670386	hypothetical protein PHYSODRAFT_318537 [Phytophthora sojae]	73.76	0.0321	1	1	2	4	655	72.3	8.18	1.568
348684335	hypothetical protein PHYSODRAFT_484868 [Phytophthora sojae]	39.62	0.3269	2	2	2	3	104	11.8	7.14	1.568
348687685	hypothetical protein PHYSODRAFT_469313 [Phytophthora sojae]	44.74	0.177	2	5	5	6	305	33.3	7.99	1.569
262099647	Delta(3,5)-Delta(2,4)-dienoyl-CoA isomerase, putative [Phytophthora infestans T30-4]	63.77	0.096	2	2	2	4	323	35.6	6.87	1.57
262108786	enoyl-CoA hydratase, mitochondrial precursor [Phytophthora infestans T30-4]	652.42	0.2846	2	1	5	52	260	27.7	5.82	1.571
348674156	putative exo-1,3-beta-glucanase [Phytophthora sojae]	567.65	0.1191	1	2	6	43	697	77.6	5.59	1.575
262111229	heat shock protein 90, putative [Phytophthora infestans T30-4]	566.86	0.1409	2	4	11	38	823	94.3	4.63	1.576
262097555	conserved hypothetical protein [Phytophthora infestans T30-4]	762.52	0.5847	3	6	11	74	183	21	4.63	1.577
348666823	hypothetical protein PHYSODRAFT_529613 [Phytophthora sojae]	99.29	0.0517	1	1	1	4	271	30.2	7.21	1.584
348666811	hypothetical protein PHYSODRAFT_565653 [Phytophthora sojae]	276.17	0.221	3	7	7	19	448	50.1	6.67	1.585
262107757	callose synthase, putative [Phytophthora infestans T30-4]	225.15	0.0525	1	3	12	26	2631	297.1	8.02	1.586
348671057	hypothetical protein PHYSODRAFT_317890 [Phytophthora sojae]	60.62	0.0296	2	1	2	2	1116	122.1	4.75	1.586
262100556	PpiC-type peptidyl-prolyl cis-trans isomerase, putative [Phytophthora infestans T30-4]	63.56	0.0906	2	1	2	3	265	28.8	7.49	1.587
348677735	hypothetical protein PHYSODRAFT_560168 [Phytophthora sojae]	46.74	0.058	43	2	3	12	517	54.1	4.67	1.588
339715925	necrosis inducing protein NPP10 [Phytophthora capsici]	89.32	0.235	1	3	3	6	234	25.5	6.95	1.591
262100322	phenylalanyl-tRNA synthetase alpha chain [Phytophthora infestans T30-4]	30.03	0.1434	1	1	4	4	502	56.8	8.9	1.592
262102114	conserved hypothetical protein [Phytophthora infestans T30-4]	36.54	0.0433	2	1	1	1	277	28.8	4.73	1.593
348664483	hypothetical protein PHYSODRAFT_343352 [Phytophthora sojae]	75.91	0.3881	2	1	1	2	67	7.1	5.17	1.593
262109275	AP-2 complex subunit alpha, putative [Phytophthora infestans T30-4]	0	0.0304	1	2	2	2	987	107.7	6.43	1.594
262108658	60S acidic ribosomal protein P0 [Phytophthora infestans T30-4]	1726.03	0.3553	1	2	6	65	318	34.4	4.73	1.598
348675965	heme peroxidase [Phytophthora sojae]	168.03	0.2426	1	2	7	28	338	37.5	8.84	1.605
262103173	CBL-interacting serine/threonine-protein kinase, putative [Phytophthora infestans T30-4]	80.39	0.0631	2	2	2	3	523	58.2	6.16	1.607
348671772	hypothetical protein PHYSODRAFT_250643 [Phytophthora sojae]	59.05	0.0382	2	3	3	4	1022	110.5	6.33	1.608
348671726	hypothetical protein PHYSODRAFT_562666 [Phytophthora sojae]	37.16	0.0668	3	3	3	4	479	51.4	4.56	1.608
262098292	conserved hypothetical protein [Phytophthora infestans T30-4]	37.4	0.0237	2	1	1	1	716	82.3	5.02	1.608
332986562	orotidine 5'-phosphate decarboxylase, partial [Phytophthora capsici]	42.81	0.2455	22	1	1	1	167	17.4	5.31	1.61
348684217	hypothetical protein PHYSODRAFT_359164 [Phytophthora sojae]	689.45	0.1242	1	1	6	44	451	51	6.93	1.613
262095044	glycerol-3-phosphate dehydrogenase, mitochondrial precursor [Phytophthora infestans T30-4]	1074.89	0.3252	1	5	17	86	615	68.1	8.66	1.614
348667962	hypothetical protein PHYSODRAFT_288955 [Phytophthora sojae]	307.52	0.1716	2	2	2	39	169	17.6	5.74	1.614
262095673	hypothetical protein PITG_19772 [Phytophthora infestans T30-4]	91.42	0.275	2	2	2	9	80	9.1	7.43	1.617
348689069	hypothetical protein PHYSODRAFT_475026 [Phytophthora sojae]	36.53	0.0108	1	1	1	2	925	102.9	5.71	1.617
262109617	maltose O-acetyltransferase [Phytophthora infestans T30-4]	71.47	0.1598	5	2	2	6	194	21.5	6.21	1.621
348688682	phospholipase D, zeta like-protein [Phytophthora sojae]	0	0.0434	2	3	3	3	922	104.7	7.58	1.623
262100160	thioredoxin-dependent peroxide reductase, putative [Phytophthora infestans T30-4]	431.69	0.2971	2	8	9	62	377	41.7	5.44	1.625
325186353	unnamed protein product [Albugo laibachii Nc14]	76.49	0.24	1	1	4	18	325	34.4	7.99	1.626
262098923	gastricsin, aspartyl protease family A01A, putative [Phytophthora infestans T30-4]	0	0.0163	2	1	1	1	737	80.6	6.18	1.627
262111983	ATP synthase subunit beta, putative [Phytophthora infestans T30-4]	10782.4	0.6462	1	1	22	731	472	50.6	5.55	1.633
348688642	G-protein alpha subunit [Phytophthora sojae]	61.22	0.1521	6	4	4	5	355	40.8	5.36	1.633
348680462	glycosyl hydrolase family 10 protein [Phytophthora sojae]	38.91	0.0344	1	1	1	1	320	35.1	9.17	1.633
348684883	hypothetical protein PHYSODRAFT_353994 [Phytophthora sojae]	92.91	0.2188	1	3	7	14	544	60	6.34	1.634
262103962	mitogen-activated protein kinase, putative [Phytophthora infestans T30-4]	37.86	0.1051	2	2	2	3	333	38	6.58	1.635
348678478	hypothetical protein PHYSODRAFT_559240 [Phytophthora sojae]	69.02	0.113	3	1	4	10	522	58.4	8.68	1.637
262104199	endo-1,3(4)-beta-glucanase, putative [Phytophthora infestans T30-4]	92.68	0.0559	1	3	3	6	823	92.1	5.67	1.637
262103003	conserved hypothetical protein [Phytophthora infestans T30-4]	49.2	0.0486	2	1	1	2	247	26.8	4.74	1.638
262106618	D-isomer specific 2-hydroxyacid dehydrogenase, putative [Phytophthora infestans T30-4]	54.18	0.0739	1	1	1	1	352	39.1	6.81	1.638
262101279	Annexin (Annexin) Family [Phytophthora infestans T30-4]	854.32	0.0808	5	1	6	63	1274	137.8	5.81	1.642
333105026	translation elongation factor 1-alpha, partial [Phytophthora capsici]	4824.93	0.6133	6	1	6	345	150	16.6	8.07	1.642
262101765	conserved hypothetical protein [Phytophthora infestans T30-4]	66.44	0.1262	3	2	2	2	214	25.2	8.72	1.643
348690786	hypothetical protein PHYSODRAFT_264096 [Phytophthora sojae]	35.07	0.0206	1	1	1	1	679	75.8	6.71	1.645
262096466	conserved hypothetical protein [Phytophthora infestans T30-4]	158.19	0.0629	3	4	4	19	668	72.3	7.97	1.646
262096097	ATP-binding Cassette (ABC) Superfamily [Phytophthora infestans T30-4]	541.1	0.0951	4	3	16	49	1945	213	5.33	1.647
262103998	CBL-interacting serine/threonine-protein kinase, putative [Phytophthora infestans T30-4]	99.87	0.1171	1	1	6	11	444	49	6.62	1.647
262099938	cathepsin, cysteine protease family C01A, putative [Phytophthora infestans T30-4]	45.19	0.0334	1	1	1	1	598	67.1	6.23	1.647
262103331	conserved hypothetical protein [Phytophthora infestans T30-4]	0	0.0373	1	1	1	1	402	45.6	6.38	1.648
262099516	estradiol 17-beta-dehydrogenase, putative [Phytophthora infestans T30-4]	68.88	0.2287	1	4	7	15	328	36	9.63	1.652
262100151	conserved hypothetical protein [Phytophthora infestans T30-4]	33.73	0.058	5	1	1	5	224	23.3	4.77	1.655
371769492	hypothetical protein, partial [Phytophthora andina]	0	0.1164	17	1	1	1	146	16	7.55	1.655
262097073	L-aminoadipate-semialdehyde dehydrogenase, putative [Phytophthora infestans T30-4]	0	0.0223	2	1	1	1	449	49.1	6.18	1.658
262098625	AhpC/TSA family Redoxin, putative [Phytophthora infestans T30-4]	160.65	0.1117	1	1	7	21	573	62.1	6.34	1.66
348671431	hypothetical protein PHYSODRAFT_548876 [Phytophthora sojae]	55.61	0.0498	12	1	2	2	603	64.4	4.97	1.663
348682940	hypothetical protein PHYSODRAFT_252187 [Phytophthora sojae]	90.32	0.0465	2	3	3	4	903	101.8	7.78	1.664
262097459	conserved hypothetical protein [Phytophthora infestans T30-4]	0	0.1333	1	2	2	5	195	21.4	4.64	1.669
123159	RecName: Full=Imidazoleglycerol-phosphate dehydratase; Short=IGPD	49.48	0.0642	2	2	2	3	452	47.9	6.21	1.671
262111999	vacuolar amino acid transporter, putative [Phytophthora infestans T30-4]	32.95	0.0145	2	1	1	1	551	60.5	5.31	1.673
262107364	conserved hypothetical protein [Phytophthora infestans T30-4]	32.75	0.3209	2	2	2	2	134	15.2	4.41	1.674
262106037	conserved hypothetical protein [Phytophthora infestans T30-4]	107.13	0.0858	2	1	1	4	268	29.1	9.41	1.675
262106660	small cysteine rich protein SCR108-like protein [Phytophthora infestans T30-4]	23.37	0.0365	2	1	1	3	192	21.1	8	1.684
348677179	hypothetical protein PHYSODRAFT_559791 [Phytophthora sojae]	176.09	0.0668	3	2	4	11	569	64.1	5.58	1.688
262099349	heat shock protein 70 [Phytophthora infestans T30-4]	1727.96	0.1927	5	1	12	143	654	71.7	5.59	1.69
262109805	conserved hypothetical protein [Phytophthora infestans T30-4]	21.09	0.0147	1	1	1	1	546	62.6	9.13	1.691
348677352	hypothetical protein PHYSODRAFT_500731 [Phytophthora sojae]	0	0.069	2	2	2	2	406	45.3	4.87	1.692
348666912	hypothetical protein PHYSODRAFT_550642 [Phytophthora sojae]	78.23	0.104	1	3	4	13	721	81.3	5.31	1.693
348676544	ABC transporter-like protein [Phytophthora sojae]	474.62	0.1358	3	1	6	33	611	67.7	6.25	1.695
262111265	conserved hypothetical protein [Phytophthora infestans T30-4]	34.3	0.0552	2	1	1	1	181	20	5.67	1.7
262106793	Resistance-Nodulation-Cell Division (RND) Superfamily [Phytophthora infestans T30-4]	137.03	0.0494	1	1	4	21	749	82.7	4.65	1.701
348687697	hypothetical protein PHYSODRAFT_321312 [Phytophthora sojae]	38.24	0.0149	1	1	1	1	669	73.6	9.66	1.704
348670516	pdr transporter [Phytophthora sojae]	49.86	0.0253	2	2	2	2	1346	148.8	5.76	1.707
348679159	hypothetical protein PHYSODRAFT_332696 [Phytophthora sojae]	68.34	0.0583	2	1	1	2	326	35.5	7.24	1.707
262101947	D-3-phosphoglycerate dehydrogenase, putative [Phytophthora infestans T30-4]	44.46	0.0415	1	1	2	4	603	65.8	6.1	1.708
348686905	hypothetical protein PHYSODRAFT_472911 [Phytophthora sojae]	0	0.1457	1	1	1	1	151	16.6	5.12	1.708
348667665	hypothetical protein PHYSODRAFT_340572 [Phytophthora sojae]	188.22	0.3187	2	9	9	24	411	42.8	8.84	1.71
348690807	hypothetical protein PHYSODRAFT_349569 [Phytophthora sojae]	276.53	0.1578	1	5	7	39	564	61.7	4.86	1.711
262106082	conserved hypothetical protein [Phytophthora infestans T30-4]	0	0.0697	1	1	1	1	244	27.1	8.22	1.713
348675377	hypothetical protein PHYSODRAFT_506633 [Phytophthora sojae]	45.33	0.014	1	1	2	4	1926	216.3	5.29	1.718
262107485	conserved hypothetical protein [Phytophthora infestans T30-4]	41.95	0.0443	1	2	2	2	700	75.8	7.69	1.724
262111200	L-gulonolactone oxidase, putative [Phytophthora infestans T30-4]	60.27	0.0982	1	4	4	7	448	51.1	6.2	1.728
262105715	isovaleryl-CoA dehydrogenase, putative [Phytophthora infestans T30-4]	49.21	0.1294	3	5	5	5	425	46.8	6.79	1.729
348671103	hypothetical protein PHYSODRAFT_464988 [Phytophthora sojae]	1362.55	0.3108	2	2	6	69	222	23.5	9.67	1.739
262100655	protein recA [Phytophthora infestans T30-4]	163.41	0.0956	2	2	2	4	366	38.8	4.88	1.739
348666001	hypothetical protein PHYSODRAFT_566334 [Phytophthora sojae]	136.23	0.0819	1	1	5	8	684	75.4	6.34	1.741
348683863	hypothetical protein PHYSODRAFT_478522 [Phytophthora sojae]	35.75	0.037	3	2	2	2	594	66.7	5.55	1.746
348687043	hypothetical protein PHYSODRAFT_538644 [Phytophthora sojae]	369.51	0.1021	1	3	3	22	235	27.2	4.3	1.747
348677095	hypothetical protein PHYSODRAFT_544689 [Phytophthora sojae]	91.58	0.1345	1	2	4	11	446	50.1	5.2	1.752
262100368	conserved hypothetical protein [Phytophthora infestans T30-4]	45.54	0.1843	1	1	5	6	331	36.5	6.76	1.753
262107808	replication factor C subunit 4 [Phytophthora infestans T30-4]	69.57	0.1091	2	2	2	3	339	37.4	7.36	1.753
262103559	glyceraldehyde-3-phosphate dehydrogenase, putative [Phytophthora infestans T30-4]	3811.28	0.6	2	1	12	354	310	33	5.77	1.757
262100029	plasma membrane H+-ATPase, putative [Phytophthora infestans T30-4]	1048.74	0.2249	3	3	16	66	965	105.9	5.53	1.757
348687551	hypothetical protein PHYSODRAFT_467898 [Phytophthora sojae]	74.06	0.1394	1	2	4	7	416	45.7	4.7	1.762
262105604	glucosamine-fructose-6-phosphate aminotransferase [isomerizing], putative [Phytophthora infestans T30-4]	111.25	0.1355	3	7	7	9	701	75.3	6.83	1.764
348685185	hypothetical protein PHYSODRAFT_478177 [Phytophthora sojae]	295.3	0.1658	1	1	6	21	561	62	5.67	1.765
262102513	thioredoxin-like protein [Phytophthora infestans T30-4]	29.76	0.0569	1	2	2	2	404	46.3	6.4	1.767
262095607	gamma-glutamyl hydrolase, putative [Phytophthora infestans T30-4]	95.07	0.142	2	3	3	7	317	35.9	5.03	1.768
348681621	hypothetical protein PHYSODRAFT_285609 [Phytophthora sojae]	36.53	0.1053	1	1	1	6	171	17.2	7.03	1.769
262106248	3,2-trans-enoyl-CoA isomerase, mitochondrial precursor [Phytophthora infestans T30-4]	175.44	0.1702	1	2	4	9	282	31.2	9.25	1.77
325180895	AlNc14C10G1266 [Albugo laibachii Nc14]	726.31	0.5728	2	6	6	74	103	11.4	11.47	1.774
348664651	hypothetical protein PHYSODRAFT_246181 [Phytophthora sojae]	73.39	0.1503	2	5	5	10	386	43.8	8.69	1.776
348684744	hypothetical protein PHYSODRAFT_344742 [Phytophthora sojae]	68.7	0.0743	45	6	7	15	1372	152.5	6.38	1.777
262099794	calcineurin-like phosphoesterase, putative [Phytophthora infestans T30-4]	46.71	0.0298	1	1	1	1	504	55.4	5.12	1.777
348676132	hypothetical protein PHYSODRAFT_316081 [Phytophthora sojae]	42.25	0.04	2	1	1	1	375	42	5.63	1.781
348666378	hypothetical protein PHYSODRAFT_289115 [Phytophthora sojae]	48.81	0.2472	1	1	1	1	89	10.4	7.44	1.783
262095381	Major Facilitator Superfamily (MFS) [Phytophthora infestans T30-4]	50.69	0.0248	1	1	1	3	484	52.1	7.78	1.786
262103094	glycoside hydrolase, putative [Phytophthora infestans T30-4]	104.11	0.0876	3	3	5	16	571	64.4	6.55	1.787
348671614	hypothetical protein PHYSODRAFT_338144 [Phytophthora sojae]	276.21	0.1963	1	1	7	30	438	48.2	5.16	1.788
262106555	conserved hypothetical protein [Phytophthora infestans T30-4]	35.81	0.0656	1	1	1	1	320	35.3	5.03	1.789
262104769	catalase [Phytophthora infestans T30-4]	307.31	0.2146	2	6	9	37	522	58.9	7.46	1.793
262098845	peroxisomal acyl-coenzyme A oxidase, putative [Phytophthora infestans T30-4]	142.84	0.0547	7	3	3	10	640	71.4	8.31	1.794
262106949	conserved hypothetical protein [Phytophthora infestans T30-4]	0	0.0193	3	1	1	1	778	86.7	8.03	1.794
348669733	pleiotropic drug resistance protein ABC superfamily [Phytophthora sojae]	252.73	0.0957	84	5	10	21	1348	150	5.99	1.795
262096214	DNA topoisomerase 2 [Phytophthora infestans T30-4]	66.54	0.0399	1	1	5	7	1505	168.6	7.37	1.799
262109851	conserved hypothetical protein [Phytophthora infestans T30-4]	230.58	0.1732	2	2	5	22	306	33.5	9.04	1.801
348667045	hypothetical protein PHYSODRAFT_319561 [Phytophthora sojae]	183.57	0.1962	2	2	9	16	469	53.6	6.06	1.804
262109135	glycoside hydrolase, putative [Phytophthora infestans T30-4]	994.17	0.0444	1	1	1	100	405	43.8	4.94	1.805
262104154	endoplasmic reticulum-Golgi intermediate compartment protein, putative [Phytophthora infestans T30-4]	128.11	0.1706	2	1	8	14	469	53.6	5.77	1.808
348670272	hypothetical protein PHYSODRAFT_522340 [Phytophthora sojae]	140.9	0.1426	1	3	8	16	666	73.3	6.21	1.811
348665522	hypothetical protein PHYSODRAFT_256065 [Phytophthora sojae]	0	0.0985	3	2	2	2	264	28.4	7.2	1.812
262109846	conserved hypothetical protein [Phytophthora infestans T30-4]	38.02	0.0464	1	1	1	1	345	37.7	9.03	1.82
262096516	conserved hypothetical protein [Phytophthora infestans T30-4]	68.25	0.0404	1	1	1	1	421	47.9	4.5	1.82
348680557	hypothetical protein PHYSODRAFT_492911 [Phytophthora sojae]	83.8	0.1287	2	3	3	7	342	37.2	8.51	1.822
348687336	hypothetical protein PHYSODRAFT_320995 [Phytophthora sojae]	137.54	0.182	2	1	6	9	665	71.5	8.65	1.822
348690457	hypothetical protein PHYSODRAFT_284598 [Phytophthora sojae]	0	0.1985	1	1	1	1	131	14.7	4.81	1.824
348672793	hypothetical protein PHYSODRAFT_355228 [Phytophthora sojae]	155.14	0.1017	2	3	4	15	295	32.6	9.07	1.825
348686662	hypothetical protein PHYSODRAFT_345188 [Phytophthora sojae]	0	0.0526	2	3	3	5	741	84.9	6.37	1.825
262094972	conserved hypothetical protein [Phytophthora infestans T30-4]	87.67	0.0489	3	7	7	8	1739	195.2	6	1.837
348682927	hypothetical protein PHYSODRAFT_345911 [Phytophthora sojae]	20.45	0.0691	1	2	2	3	622	66.9	6.35	1.839
348682750	hypothetical protein PHYSODRAFT_496026 [Phytophthora sojae]	24.03	0.0215	3	1	1	1	326	36.2	6.19	1.841
348678053	hypothetical protein PHYSODRAFT_560377 [Phytophthora sojae]	26.11	0.1228	13	1	6	10	570	63.8	8.91	1.844
348674126	hypothetical protein PHYSODRAFT_418086 [Phytophthora sojae]	62.49	0.1429	1	1	1	4	63	7.1	9.52	1.847
262107537	conserved hypothetical protein [Phytophthora infestans T30-4]	41.79	0.125	2	2	2	2	160	18.1	8.09	1.85
262098611	glucan 1,3-beta-glucosidase, putative [Phytophthora infestans T30-4]	128.05	0.087	2	2	4	17	621	70.2	6.15	1.851
348679595	proton pump, proton transport [Phytophthora sojae]	187.36	0.1214	1	1	8	23	873	99.1	5.9	1.852
262106113	ATP-binding Cassette (ABC) Superfamily [Phytophthora infestans T30-4]	65.34	0.0385	2	1	1	1	831	92.6	7.4	1.852
262110731	Mitochondrial Protein Translocase (MPT) Family [Phytophthora infestans T30-4]	58.06	0.1113	1	1	4	6	467	53.3	5.29	1.853
262106372	peroxisomal 2,4-dienoyl-CoA reductase, putative [Phytophthora infestans T30-4]	84.02	0.1919	2	4	4	10	297	31.5	9.47	1.853
262098441	lysosomal alpha-mannosidase, putative [Phytophthora infestans T30-4]	497.85	0.1632	1	6	12	46	1023	114.6	5.59	1.857
262102327	12-oxophytodienoate reductase, putative [Phytophthora infestans T30-4]	117.81	0.1183	4	3	4	13	372	41.2	6.81	1.857
348679431	hypothetical protein PHYSODRAFT_557078 [Phytophthora sojae]	270.28	0.1475	1	5	9	20	800	88.7	7.66	1.863
262097979	conserved hypothetical protein [Phytophthora infestans T30-4]	74.11	0.0661	2	3	6	13	999	108.9	4.91	1.865
348666185	hypothetical protein PHYSODRAFT_551377 [Phytophthora sojae]	54.11	0.0241	1	1	1	1	1120	122.9	4.87	1.873
262107857	malate synthase [Phytophthora infestans T30-4]	1102.37	0.3178	4	2	16	87	535	59.6	7.61	1.881
262098141	conserved hypothetical protein [Phytophthora infestans T30-4]	41.53	0.1015	1	1	1	2	197	21.6	6.52	1.881
348677176	hypothetical protein PHYSODRAFT_544745 [Phytophthora sojae]	67.54	0.087	8	4	4	7	586	65.9	5.54	1.883
348673058	hypothetical protein PHYSODRAFT_334720 [Phytophthora sojae]	82.74	0.0629	2	2	2	9	477	51.3	4.6	1.885
262103143	serine protease family S10, putative [Phytophthora infestans T30-4]	78.79	0.0992	1	1	3	6	474	53.1	5.97	1.886
262108654	carbohydrate esterase, putative [Phytophthora infestans T30-4]	295.48	0.0637	1	1	3	24	675	68.6	4.75	1.887
262098991	endoplasmic reticulum-Golgi intermediate compartment protein, putative [Phytophthora infestans T30-4]	64.48	0.0789	2	2	2	3	393	43.7	6.73	1.896
262107764	sorting and assembly machinery component 50 [Phytophthora infestans T30-4]	51.87	0.0842	1	2	3	4	463	50.5	7.12	1.908
262101948	conserved hypothetical protein [Phytophthora infestans T30-4]	51.85	0.0732	1	2	2	2	519	58.3	9.73	1.91
348684163	hypothetical protein PHYSODRAFT_325136 [Phytophthora sojae]	50.68	0.0306	1	1	1	2	589	63.5	5.74	1.914
348671348	hypothetical protein PHYSODRAFT_287246 [Phytophthora sojae]	132.24	0.2248	2	2	2	9	129	14.8	9.28	1.915
262102562	2,4-dienoyl-CoA reductase, mitochondrial precursor [Phytophthora infestans T30-4]	423.51	0.2508	4	1	7	25	307	32.4	9.07	1.924
262099169	creatine kinase B-type [Phytophthora infestans T30-4]	552.87	0.3295	1	3	12	82	431	47.4	8.56	1.926
348664658	hypothetical protein PHYSODRAFT_536256 [Phytophthora sojae]	59.64	0.0394	1	2	2	5	660	72.9	6.18	1.947
262108152	ATPase [Phytophthora infestans T30-4]	54.15	0.031	2	1	1	1	581	64.1	8.4	1.957
348681209	hypothetical protein PHYSODRAFT_354354 [Phytophthora sojae]	27.65	0.0386	1	1	1	1	207	22.2	8.51	1.96
262101229	myoferlin-like protein [Phytophthora infestans T30-4]	113.89	0.0161	1	1	2	3	1928	216.5	5.36	1.964
348686198	hypothetical protein PHYSODRAFT_555560 [Phytophthora sojae]	48.95	0.0453	1	1	1	2	486	53.8	4.93	1.965
262112036	thioredoxin-like protein [Phytophthora infestans T30-4]	185.3	0.0992	2	2	3	13	363	40.4	7.14	1.976
262095287	stromal cell-derived factor 2 precursor [Phytophthora infestans T30-4]	0	0.0707	2	1	1	1	297	33	6.15	1.979
348682852	hypothetical protein PHYSODRAFT_543145 [Phytophthora sojae]	36.63	0.0953	2	4	4	4	472	52.6	6.62	1.982
262108020	signal recognition particle receptor subunit alpha [Phytophthora infestans T30-4]	86.25	0.0401	1	1	1	1	549	60.9	8.63	1.983
262095375	conserved hypothetical protein [Phytophthora infestans T30-4]	118.36	0.1971	2	3	3	8	279	30.4	5.25	1.989
348670494	hypothetical protein PHYSODRAFT_318600 [Phytophthora sojae]	305.66	0.1534	2	6	7	48	678	74.7	4.44	1.998
262094986	conserved hypothetical protein [Phytophthora infestans T30-4]	64.96	0.0485	3	2	2	3	433	49	8.51	2.001
262100335	Amino Acid-Polyamine-Organocation (APC) Family [Phytophthora infestans T30-4]	0	0.018	3	1	1	1	555	60.5	6.15	2.001
348678295	hypothetical protein PHYSODRAFT_351306 [Phytophthora sojae]	132.55	0.1054	2	3	3	6	427	46.2	6.7	2.014
348677969	hypothetical protein PHYSODRAFT_285969 [Phytophthora sojae]	33.51	0.0486	1	1	1	1	288	32.6	7.39	2.017
262109845	conserved hypothetical protein [Phytophthora infestans T30-4]	251.02	0.1577	2	2	6	23	317	34.5	9.11	2.019
348681951	hypothetical protein PHYSODRAFT_557666 [Phytophthora sojae]	206.41	0.2098	1	2	8	13	610	65.6	6.98	2.021
348669501	hypothetical protein PHYSODRAFT_352787 [Phytophthora sojae]	601.45	0.1227	2	8	8	36	823	89.8	6.54	2.035
262103756	choline/Carnitine O-acyltransferase, putative [Phytophthora infestans T30-4]	115.28	0.115	2	4	4	5	626	71	6.73	2.035
348687786	hypothetical protein PHYSODRAFT_261542 [Phytophthora sojae]	85.8	0.0938	1	1	3	9	469	52.2	8.91	2.039
262102598	conserved hypothetical protein [Phytophthora infestans T30-4]	299.11	0.337	2	5	5	29	184	19.9	9.94	2.039
262104162	glycoside hydrolase, putative [Phytophthora infestans T30-4]	0	0.0357	1	1	1	1	308	34.1	4.7	2.039
348690480	hypothetical protein PHYSODRAFT_553352 [Phytophthora sojae]	249.83	0.1662	1	2	11	41	764	83.1	8.76	2.04
262107575	glycoside hydrolase, putative [Phytophthora infestans T30-4]	0	0.0354	14	1	2	2	790	86.7	4.89	2.042
262105742	acyl-CoA dehydrogenase, putative [Phytophthora infestans T30-4]	455.97	0.2134	1	5	14	52	764	83.1	8.44	2.048
262108637	calcineurin-like phosphoesterase, putative [Phytophthora infestans T30-4]	52.68	0.0318	1	1	1	2	598	67.5	6.13	2.05
262100370	cell division protease ftsH [Phytophthora infestans T30-4]	63.43	0.1839	2	1	6	8	658	71.3	8.88	2.068
262105369	conserved hypothetical protein [Phytophthora infestans T30-4]	49.55	0.037	2	1	1	3	622	66.5	8.4	2.079
262105670	inorganic phosphate transporter, putative [Phytophthora infestans T30-4]	244.81	0.1221	1	2	4	10	467	50.2	5.48	2.084
262096305	methylcrotonoyl-CoA carboxylase beta chain, mitochondrial precursor [Phytophthora infestans T30-4]	205.88	0.1877	3	6	7	11	570	61.5	8.24	2.092
262099852	cytochrome c peroxidase, mitochondrial precursor [Phytophthora infestans T30-4]	285.9	0.3194	1	3	8	33	335	37.2	8.4	2.092
348673808	hypothetical protein PHYSODRAFT_355001 [Phytophthora sojae]	562.61	0.4317	1	2	7	55	183	21	4.63	2.097
348686363	hypothetical protein PHYSODRAFT_258677 [Phytophthora sojae]	83.74	0.063	2	3	3	4	460	51.5	6.13	2.116
348668927	hypothetical protein PHYSODRAFT_355873 [Phytophthora sojae]	111.3	0.1242	1	1	6	9	660	73	7.01	2.116
407079205	cytochrome c oxidase subunit 2, partial (mitochondrion) [Peronospora stigmaticola]	139.54	0.1955	138	1	4	24	179	20.5	4.79	2.123
348673055	hypothetical protein PHYSODRAFT_361123 [Phytophthora sojae]	37.72	0.07	1	1	1	2	243	25.7	8.12	2.134
348676873	hypothetical protein PHYSODRAFT_330751 [Phytophthora sojae]	102.12	0.1208	3	3	3	10	298	32.9	8.13	2.155
348677015	hypothetical protein PHYSODRAFT_351065 [Phytophthora sojae]	223.79	0.2163	3	8	8	18	393	44.1	4.6	2.157
262111374	putative GPI-anchored serine rich tenascin-like glycoprotein [Phytophthora infestans T30-4]	170.83	0.1432	1	3	3	6	405	41.5	4.86	2.159
348673593	hypothetical protein PHYSODRAFT_286614 [Phytophthora sojae]	114.09	0.4691	2	3	3	11	81	9.2	8.18	2.159
348677736	hypothetical protein PHYSODRAFT_262464 [Phytophthora sojae]	152.59	0.0962	43	3	4	22	520	54.8	5.05	2.161
262095970	ATP-binding Cassette (ABC) Superfamily [Phytophthora infestans T30-4]	216.15	0.086	80	2	7	17	1279	142.7	5.83	2.176
348672571	hypothetical protein PHYSODRAFT_317487 [Phytophthora sojae]	28.36	0.0628	1	1	1	1	191	20.2	4.97	2.193
348689895	hypothetical protein PHYSODRAFT_552881 [Phytophthora sojae]	201.05	0.2014	1	2	4	13	283	30.9	8.92	2.199
348689826	hypothetical protein PHYSODRAFT_252686 [Phytophthora sojae]	163.04	0.0531	1	1	1	5	320	34	9.01	2.209
348684312	hypothetical protein PHYSODRAFT_353917 [Phytophthora sojae]	1013.94	0.3264	1	3	12	105	435	47.7	8.94	2.221
262098068	protein kinase, putative [Phytophthora infestans T30-4]	37.5	0.0354	2	1	1	1	678	74.2	5.14	2.222
262107674	conserved hypothetical protein [Phytophthora infestans T30-4]	0	0.0272	1	1	1	1	367	41.1	4.77	2.238
348667628	putative GH30 glucocerebrosidase/glucosylceramidase precursor [Phytophthora sojae]	74.22	0.0695	3	1	4	6	676	75.7	5.12	2.247
262102213	transmembrane protein, putative [Phytophthora infestans T30-4]	0	0.0641	3	1	1	4	343	38.4	5.54	2.249
348672882	hypothetical protein PHYSODRAFT_563420 [Phytophthora sojae]	51.68	0.0579	2	1	1	1	328	36.4	4.74	2.266
325191950	guanine nucleotidebinding protein subunit beta2like protein putative [Albugo laibachii Nc14]	1012.79	0.2642	1	1	9	94	318	34.8	7.46	2.268
262096360	conserved hypothetical protein [Phytophthora infestans T30-4]	27.22	0.0234	2	1	1	4	384	41.7	9.36	2.269
262096324	glucosylceramidase, putative [Phytophthora infestans T30-4]	99.2	0.0752	1	1	3	8	585	66.5	5.35	2.275
262097980	conserved hypothetical protein [Phytophthora infestans T30-4]	49.32	0.0354	2	1	4	8	1103	121.2	4.7	2.286
348672803	hypothetical protein PHYSODRAFT_517075 [Phytophthora sojae]	122.55	0.123	1	1	3	11	317	34.1	8.75	2.325
348690378	hypothetical protein PHYSODRAFT_323613 [Phytophthora sojae]	237.07	0.1092	2	2	4	11	531	57.4	5.76	2.355
262096280	choline dehydrogenase, putative [Phytophthora infestans T30-4]	50.4	0.0257	1	2	2	2	662	72.1	6.35	2.356
262111618	peroxisomal multifunctional enzyme, putative [Phytophthora infestans T30-4]	0	0.0713	1	1	2	3	421	46.6	9.31	2.375
262111860	enoyl-CoA hydratase/isomerase family, putative [Phytophthora infestans T30-4]	101.71	0.0967	2	2	2	8	269	29.8	7.93	2.388
348680416	hypothetical protein PHYSODRAFT_285389 [Phytophthora sojae]	1023.24	0.2641	2	2	6	72	284	30.2	7.69	2.415
262106276	glycoside hydrolase, putative [Phytophthora infestans T30-4]	40.13	0.1111	1	2	2	4	279	29.2	8.27	2.494
262095929	Major Facilitator Superfamily (MFS) [Phytophthora infestans T30-4]	39.03	0.0214	2	1	1	2	562	61.6	7.87	2.502
348681871	hypothetical protein PHYSODRAFT_557610 [Phytophthora sojae]	35.34	0.0194	1	1	1	2	412	46.9	9.51	2.534
348666676	hypothetical protein PHYSODRAFT_341763 [Phytophthora sojae]	399.53	0.1086	1	1	3	28	359	39	6.52	2.536
262095511	conserved hypothetical protein [Phytophthora infestans T30-4]	62.13	0.0222	2	1	1	1	899	100.9	5.26	2.553
262096022	conserved hypothetical protein [Phytophthora infestans T30-4]	36.26	0.0605	1	1	1	1	281	30.6	5.22	2.586
325179968	acetylCoA carboxylase putative [Albugo laibachii Nc14]	130.8	0.043	1	1	2	5	628	69.5	8.15	2.645
348672790	hypothetical protein PHYSODRAFT_337031 [Phytophthora sojae]	66.32	0.1103	2	2	4	14	263	28.9	9.17	2.649
262111960	long-chain-fatty-acid-CoA ligase, putative [Phytophthora infestans T30-4]	92.85	0.1471	3	3	8	16	666	72.9	6.11	2.675
348677863	hypothetical protein PHYSODRAFT_560221 [Phytophthora sojae]	37.46	0.0226	1	1	1	2	531	58.1	6.95	2.701
262110319	conserved hypothetical protein [Phytophthora infestans T30-4]	82.04	0.0285	1	2	2	7	1123	123.8	4.84	2.741
262100900	conserved hypothetical protein [Phytophthora infestans T30-4]	91.96	0.1351	1	1	6	8	659	73.2	6.51	2.762
348690309	hypothetical protein PHYSODRAFT_323562 [Phytophthora sojae]	29.79	0.1098	1	1	1	1	173	19.8	10.48	2.765
348679829	putative lectin [Phytophthora sojae]	327.83	0.3504	4	2	2	8	137	15.1	7.02	2.785
262099326	aldehyde dehydrogenase, putative [Phytophthora infestans T30-4]	64.55	0.0738	1	1	3	4	515	56.8	6.16	2.816
348690567	hypothetical protein PHYSODRAFT_553409 [Phytophthora sojae]	40.38	0.0267	1	1	1	4	450	47.1	4.27	2.853
348678551	hypothetical protein PHYSODRAFT_261444 [Phytophthora sojae]	43.29	0.0681	1	1	2	8	323	34	4.53	2.894
348671060	hypothetical protein PHYSODRAFT_519031 [Phytophthora sojae]	48.33	0.0075	1	1	1	1	1071	117.2	4.97	3.018
348684588	hypothetical protein PHYSODRAFT_556984 [Phytophthora sojae]	128.07	0.0738	1	1	3	7	515	56.4	6.47	3.066
262103988	major Facilitator Superfamily MFS [Phytophthora infestans T30-4]	18.9	0.0503	1	1	1	2	477	52.4	6.13	3.184
262096323	glucosylceramidase, putative [Phytophthora infestans T30-4]	43.53	0.0698	2	1	4	6	673	75.9	5.38	3.188
348689774	hypothetical protein PHYSODRAFT_323095 [Phytophthora sojae]	36.56	0.0281	1	1	1	10	570	59.5	5.01	3.195
348686839	hypothetical protein PHYSODRAFT_252576 [Phytophthora sojae]	168.7	0.0413	1	2	4	13	1138	118.9	4.93	3.233
262098679	hypothetical protein PITG_20406 [Phytophthora infestans T30-4]	0	0.0565	1	1	1	1	637	68	4.88	3.327
348673089	hypothetical protein PHYSODRAFT_334746 [Phytophthora sojae]	38.86	0.0346	1	1	1	1	578	63.3	6.89	3.389
262106971	acyl-CoA dehydrogenase, putative [Phytophthora infestans T30-4]	139.56	0.0811	2	2	6	14	801	89.4	7.96	3.619
348681327	pleiotropic drug resistance protein ABC superfamily [Phytophthora sojae]	81.65	0.0321	2	1	2	4	1152	126.6	5.9	3.767
262107218	ATP-binding Cassette (ABC) Superfamily [Phytophthora infestans T30-4]	478.02	0.1551	7	2	7	35	535	58.6	7.34	3.83
262107577	lysosomal beta glucosidase, putative [Phytophthora infestans T30-4]	56.8	0.0279	14	1	2	2	1148	127.5	5.59	3.897
348686202	hypothetical protein PHYSODRAFT_555569 [Phytophthora sojae]	32.69	0.0162	3	1	1	2	494	55.1	4.94	3.909
262108963	glucosylceramidase, putative [Phytophthora infestans T30-4]	126.39	0.0426	2	3	3	33	516	57	4.72	4.197
348676364	hypothetical protein PHYSODRAFT_505939 [Phytophthora sojae]	44.8	0.0106	1	1	1	1	1706	188.8	5.12	4.323
348672008	hypothetical protein PHYSODRAFT_286828 [Phytophthora sojae]	1262.45	0.1784	1	1	2	324	185	18.1	4.17	4.648
348672012	elicitin [Phytophthora sojae]	0	0.232	3	2	2	2	194	19.1	3.93	5.224
262104542	vacuolar proton translocating ATPase A subunit, putative [Phytophthora infestans T30-4]	187.36	0.1362	1	1	8	23	859	97.6	6.07	6.334
262102176	elicitin-like protein [Phytophthora infestans T30-4]	503.88	0.1864	1	1	2	151	177	17.7	4.41	6.537
325181730	AlNc14C19G1965 [Albugo laibachii Nc14]	28.87	0.0299	1	1	1	2	201	22.6	5.07
348684999	hypothetical protein PHYSODRAFT_483648 [Phytophthora sojae]	30.76	0.0094	1	1	1	1	636	72	8
262100730	ATP-binding Cassette (ABC) Superfamily [Phytophthora infestans T30-4]	29.54	0.0171	4	1	1	2	351	39.2	7.21
325190603	conserved hypothetical protein [Albugo laibachii Nc14]	0	0.0093	1	1	1	1	751	85.8	7.71
348678140	hypothetical protein PHYSODRAFT_331861 [Phytophthora sojae]	32.88	0.0224	1	1	1	1	313	35.1	5.27
262108249	HECT E3 ubiquitin ligase, putative [Phytophthora infestans T30-4]	48.83	0.0047	2	2	2	2	5129	567.5	5.33
262096337	vesicle-trafficking protein SEC22b, putative [Phytophthora infestans T30-4]	33.19	0.0359	2	1	1	2	223	25.7	9.41
262108064	phosphoglycerate mutase, putative [Phytophthora infestans T30-4]	0	0.0151	2	1	1	1	531	60.5	7.52
262109839	oxidoreductase family, putative [Phytophthora infestans T30-4]	26.54	0.0179	2	1	1	1	392	43.2	6.74
262101591	Phosphatidylinositol kinase (PIK-L2) [Phytophthora infestans T30-4]	0	0.0041	1	1	1	1	2659	297.3	6.84
348690488	hypothetical protein PHYSODRAFT_467062 [Phytophthora sojae]	29.96	0.0058	2	1	1	1	1382	159.9	8.34
262098632	conserved hypothetical protein [Phytophthora infestans T30-4]	40.05	0.0156	3	1	1	1	642	69.8	5.1
262102923	transmembrane protein, putative [Phytophthora infestans T30-4]	65.44	0.0463	2	1	1	3	216	24	6.81
348688814	hypothetical protein PHYSODRAFT_552348 [Phytophthora sojae]	48.52	0.0151	1	1	1	1	598	66.7	6.55
262097353	conserved hypothetical protein [Phytophthora infestans T30-4]	37.86	0.0061	2	1	1	2	1650	180.6	6.28
262096053	Resistance-Nodulation-Cell Division (RND) Superfamily [Phytophthora infestans T30-4]	35.55	0.049	1	1	4	4	694	76.7	5.08
262108669	conserved hypothetical protein [Phytophthora infestans T30-4]	38.48	0.0082	3	1	1	2	1092	125.2	7.42
348683485	hypothetical protein PHYSODRAFT_556110 [Phytophthora sojae]	180.86	0.0881	1	1	5	13	511	57.4	8.9
262100275	conserved hypothetical protein [Phytophthora infestans T30-4]	58.97	0.0077	1	1	1	1	1294	146.1	6.64
348671686	hypothetical protein PHYSODRAFT_516057 [Phytophthora sojae]	0	0.0339	2	1	1	1	295	33.3	5.2
262102247	cytochrome c [Phytophthora infestans T30-4]	1152.37	0.2768	2	1	4	51	112	12.1	9.48
262095991	conserved hypothetical protein [Phytophthora infestans T30-4]	22.6	0.0316	2	1	1	1	316	36	5.45
348669820	hypothetical protein PHYSODRAFT_361838 [Phytophthora sojae]	0	0.028	2	1	1	2	429	47.4	5.62
262100704	Resistance-Nodulation-Cell Division (RND) Superfamily [Phytophthora infestans T30-4]	49.84	0.01	2	1	1	1	1005	111.5	5.39
348687104	hypothetical protein PHYSODRAFT_353356 [Phytophthora sojae]	23.25	0.0252	2	1	1	1	437	48.2	5.62
262111213	conserved hypothetical protein [Phytophthora infestans T30-4]	34.59	0.0091	2	1	1	1	1214	133.4	5
262100041	conserved hypothetical protein [Phytophthora infestans T30-4]	35.41	0.0476	1	1	1	1	252	28.3	8.38
348666556	pleiotropic drug resistance protein ABC superfamily [Phytophthora sojae]	360.11	0.1041	48	0	8	18	1354	152	7.08
348666543	pleiotropic drug resistance protein ABC superfamily [Phytophthora sojae]	278.93	0.0885	41	0	6	13	1310	147.2	6.86
262102785	ATP-binding Cassette (ABC) Superfamily [Phytophthora infestans T30-4]	288.41	0.0875	46	0	7	15	1349	151.8	6.86
348665015	hypothetical protein PHYSODRAFT_356229 [Phytophthora sojae]	74.22	0.1595	1	1	7	10	514	56.6	6.81
262099529	chromodomain-helicase-DNA-binding protein, putative [Phytophthora infestans T30-4]	51.9	0.0067	1	1	1	1	1788	204.8	6.73
348670861	hypothetical protein PHYSODRAFT_347536 [Phytophthora sojae]	0	0.0021	1	1	1	1	2918	323.4	5.33
262102838	conserved hypothetical protein [Phytophthora infestans T30-4]	31	0.0651	2	1	1	1	215	24.8	4.59
348670284	hypothetical protein PHYSODRAFT_549331 [Phytophthora sojae]	55.98	0.105	1	1	3	6	362	41.6	6.18
262098362	pre-mRNA-splicing factor ATP-dependent RNA helicase PRP43 [Phytophthora infestans T30-4]	0	0.0167	4	1	1	1	719	80.7	7.77
262100384	phosphatidylinositol synthase (PIS) [Phytophthora infestans T30-4]	0	0.0783	1	1	1	1	217	24.6	7.3
262098207	ubiquitin carboxyl-terminal hydrolase, putative [Phytophthora infestans T30-4]	36.45	0.0837	2	1	1	1	239	26.7	4.96
262108000	alanine aminotransferase 2 [Phytophthora infestans T30-4]	120.54	0.1141	1	1	4	8	491	54.1	6.48
348687635	hypothetical protein PHYSODRAFT_348923 [Phytophthora sojae]	53.06	0.0333	2	1	1	2	480	53	6.58
